# Supplementary material
Source: Research Square preprint supplement (doi:10.21203/rs.3.rs-9789181/v1)
Supplement: Supplementary file 1 [file 36f1c2f5a083e0503a47b6f5.xlsx]

## Sheet: Sheet1
Table S7 qPCR primer
Q-L68-F	CTCCCTCAAGCTGTTCTTATC
Q-L68-R	TGTGGCCTTGAATCCTAAAG
Q-L102-F	GGTACATATAACAAGTGGGATGG
Q-L102-R	TCGATCCAGAATAGCGAAGG
Q-L155-F	GTTGGGCAATCAGCTGCTG
Q-L55-R	GCTTTGGATTGAATCCACACTG
Ms actinF	TTTCCAGGTATTGCTGACCGTAT
Ms actinR	CACCCTTGGATATCCACATCTGC
