# Supplementary material
Source: Research Square preprint supplement (doi:10.21203/rs.3.rs-9789181/v1)
Supplement: Supplementary file 2 [file 41bc65a110285bb2bb2b2aea.xlsx]

## Sheet: Sheet1
MsLAC1	G-Box	553	cis-acting regulatory element involved in light responsiveness
MsLAC1	G-Box	622	cis-acting regulatory element involved in light responsiveness
MsLAC1	G-Box	1229	cis-acting regulatory element involved in light responsiveness
MsLAC1	G-Box	1277	cis-acting regulatory element involved in light responsiveness
MsLAC1	G-Box	1296	cis-acting regulatory element involved in light responsiveness
MsLAC1	G-Box	1372	cis-acting regulatory element involved in light responsiveness
MsLAC1	AP-1	697
MsLAC1	W box	379
MsLAC1	W box	537
MsLAC1	W box	1417
MsLAC1	W box	1698
MsLAC1	STRE	1237
MsLAC1	GARE-motif	1722	gibberellin-responsive element
MsLAC1	AAGAA-motif	921
MsLAC1	ERE	511
MsLAC1	GT1-motif	688	light responsive element
MsLAC1	MYB	687
MsLAC1	MYB	1122
MsLAC1	MYB	1723
MsLAC1	ABRE	554	cis-acting element involved in the abscisic acid responsiveness
MsLAC1	ABRE	623	cis-acting element involved in the abscisic acid responsiveness
MsLAC1	ABRE	1229	cis-acting element involved in the abscisic acid responsiveness
MsLAC1	ABRE	1277	cis-acting element involved in the abscisic acid responsiveness
MsLAC1	ABRE	1296	cis-acting element involved in the abscisic acid responsiveness
MsLAC1	ABRE	1372	cis-acting element involved in the abscisic acid responsiveness
MsLAC1	TCA-element	178	cis-acting element involved in salicylic acid responsiveness
MsLAC1	TCA-element	1096	cis-acting element involved in salicylic acid responsiveness
MsLAC1	GCN4_motif	1441	cis-regulatory element involved in endosperm expression
MsLAC1	Myb-binding site	1122
MsLAC1	Myb-binding site	1723
MsLAC1	ARE	557	cis-acting regulatory element essential for the anaerobic induction
MsLAC1	ARE	1225	cis-acting regulatory element essential for the anaerobic induction
MsLAC1	ARE	1273	cis-acting regulatory element essential for the anaerobic induction
MsLAC1	ARE	1292	cis-acting regulatory element essential for the anaerobic induction
MsLAC1	ARE	1368	cis-acting regulatory element essential for the anaerobic induction
MsLAC1	ARE	1673	cis-acting regulatory element essential for the anaerobic induction
MsLAC1	MYC	164
MsLAC1	MYC	376
MsLAC1	MYC	1422
MsLAC1	MYC	1855
MsLAC1	MYC	1873
MsLAC1	MYC	1982
MsLAC1	TCT-motif	582	part of a light responsive element
MsLAC1	TCT-motif	616	part of a light responsive element
MsLAC1	TC-rich repeats	612	cis-acting element involved in defense and stress responsiveness
MsLAC1	Box 4	570	part of a conserved DNA module involved in light responsiveness
MsLAC1	MRE	1075	MYB binding site involved in light responsiveness
MsLAC10	STRE	701
MsLAC10	MYB recognition site	1791
MsLAC10	CCAAT-box	1791	MYBHv1 binding site
MsLAC10	GT1-motif	1165	light responsive element
MsLAC10	GT1-motif	1166	light responsive element
MsLAC10	ERE	61
MsLAC10	ERE	1448
MsLAC10	ERE	1507
MsLAC10	ERE	1601
MsLAC10	ACE	11	cis-acting element involved in light responsiveness
MsLAC10	MBSI	1167	MYB binding site involved in flavonoid biosynthetic genes regulation
MsLAC10	WUN-motif	238
MsLAC10	TCA-element	782	cis-acting element involved in salicylic acid responsiveness
MsLAC10	TCA-element	1181	cis-acting element involved in salicylic acid responsiveness
MsLAC10	TCA-element	1304	cis-acting element involved in salicylic acid responsiveness
MsLAC10	MYB	1244
MsLAC10	MYB	1692
MsLAC10	MYB	1762
MsLAC10	Box 4	1358	part of a conserved DNA module involved in light responsiveness
MsLAC10	Box 4	1503	part of a conserved DNA module involved in light responsiveness
MsLAC10	Myb	1522
MsLAC10	TCT-motif	1516	part of a light responsive element
MsLAC10	MYC	278
MsLAC10	MYC	1696
MsLAC10	MYC	1984
MsLAC10	ARE	1213	cis-acting regulatory element essential for the anaerobic induction
MsLAC10	ARE	1341	cis-acting regulatory element essential for the anaerobic induction
MsLAC100	TCA	315
MsLAC100	TCA	335
MsLAC100	TCA	766
MsLAC100	CAT-box	537	cis-acting regulatory element related to meristem expression
MsLAC100	MYC	557
MsLAC100	MYC	897
MsLAC100	MYC	1587
MsLAC100	MYC	1866
MsLAC100	ARE	1413	cis-acting regulatory element essential for the anaerobic induction
MsLAC100	Box 4	226	part of a conserved DNA module involved in light responsiveness
MsLAC100	Box 4	1972	part of a conserved DNA module involved in light responsiveness
MsLAC100	MRE	247	MYB binding site involved in light responsiveness
MsLAC100	MRE	349	MYB binding site involved in light responsiveness
MsLAC100	MRE	992	MYB binding site involved in light responsiveness
MsLAC100	MRE	1183	MYB binding site involved in light responsiveness
MsLAC100	CGTCA-motif	512	cis-acting regulatory element involved in the MeJA-responsiveness
MsLAC100	MYB	518
MsLAC100	MYB	542
MsLAC100	MYB	1439
MsLAC100	ABRE	1573	cis-acting element involved in the abscisic acid responsiveness
MsLAC100	TGACG-motif	512	cis-acting regulatory element involved in the MeJA-responsiveness
MsLAC100	WUN-motif	1276
MsLAC100	WUN-motif	1720
MsLAC100	as-1	512
MsLAC100	Myb-binding site	1439
MsLAC100	ACE	241	cis-acting element involved in light responsiveness
MsLAC100	ACE	352	cis-acting element involved in light responsiveness
MsLAC100	ATC-motif	1679	part of a conserved DNA module involved in light responsiveness
MsLAC100	Myc	1213
MsLAC100	AAGAA-motif	978
MsLAC100	AAGAA-motif	1918
MsLAC100	ERE	650
MsLAC100	ERE	652
MsLAC100	ERE	1944
MsLAC100	GT1-motif	990	light responsive element
MsLAC100	G-Box	1572	cis-acting regulatory element involved in light responsiveness
MsLAC100	W box	1513
MsLAC100	STRE	526
MsLAC100	STRE	548
MsLAC100	STRE	1026
MsLAC101	CGTCA-motif	59	cis-acting regulatory element involved in the MeJA-responsiveness
MsLAC101	CGTCA-motif	260	cis-acting regulatory element involved in the MeJA-responsiveness
MsLAC101	CGTCA-motif	507	cis-acting regulatory element involved in the MeJA-responsiveness
MsLAC101	CGTCA-motif	565	cis-acting regulatory element involved in the MeJA-responsiveness
MsLAC101	TGA-element	973	auxin-responsive element
MsLAC101	Box 4	1028	part of a conserved DNA module involved in light responsiveness
MsLAC101	Box 4	1200	part of a conserved DNA module involved in light responsiveness
MsLAC101	Myb	748
MsLAC101	Myb	978
MsLAC101	CAT-box	322	cis-acting regulatory element related to meristem expression
MsLAC101	CAT-box	1375	cis-acting regulatory element related to meristem expression
MsLAC101	ARE	574	cis-acting regulatory element essential for the anaerobic induction
MsLAC101	ARE	1633	cis-acting regulatory element essential for the anaerobic induction
MsLAC101	MYC	367
MsLAC101	MYC	392
MsLAC101	MYC	1174
MsLAC101	MYC	1668
MsLAC101	Myb-binding site	1136
MsLAC101	DRE core	897
MsLAC101	as-1	59
MsLAC101	as-1	260
MsLAC101	as-1	507
MsLAC101	as-1	565
MsLAC101	ABRE	198	cis-acting element involved in the abscisic acid responsiveness
MsLAC101	ABRE	1248	cis-acting element involved in the abscisic acid responsiveness
MsLAC101	TGACG-motif	59	cis-acting regulatory element involved in the MeJA-responsiveness
MsLAC101	TGACG-motif	260	cis-acting regulatory element involved in the MeJA-responsiveness
MsLAC101	TGACG-motif	507	cis-acting regulatory element involved in the MeJA-responsiveness
MsLAC101	TGACG-motif	565	cis-acting regulatory element involved in the MeJA-responsiveness
MsLAC101	CARE	515
MsLAC101	MYB	398
MsLAC101	MYB	622
MsLAC101	MYB	1136
MsLAC101	AAGAA-motif	1716
MsLAC101	ERE	23
MsLAC101	ERE	331
MsLAC101	W box	205
MsLAC101	STRE	1590
MsLAC101	TATC-box	1410	cis-acting element involved in gibberellin-responsiveness
MsLAC101	MBS	748	MYB binding site involved in drought-inducibility
MsLAC101	MBS	978	MYB binding site involved in drought-inducibility
MsLAC101	G-box	198	cis-acting regulatory element involved in light responsiveness
MsLAC101	G-box	1248	cis-acting regulatory element involved in light responsiveness
MsLAC102	MYC	72
MsLAC102	MYC	949
MsLAC102	MYC	1720
MsLAC102	MYC	1760
MsLAC102	TC-rich repeats	633	cis-acting element involved in defense and stress responsiveness
MsLAC102	Box 4	163	part of a conserved DNA module involved in light responsiveness
MsLAC102	Box 4	235	part of a conserved DNA module involved in light responsiveness
MsLAC102	Box 4	435	part of a conserved DNA module involved in light responsiveness
MsLAC102	Box 4	1080	part of a conserved DNA module involved in light responsiveness
MsLAC102	Box 4	1199	part of a conserved DNA module involved in light responsiveness
MsLAC102	Box 4	1557	part of a conserved DNA module involved in light responsiveness
MsLAC102	CGTCA-motif	698	cis-acting regulatory element involved in the MeJA-responsiveness
MsLAC102	CGTCA-motif	1724	cis-acting regulatory element involved in the MeJA-responsiveness
MsLAC102	as-1	698
MsLAC102	as-1	1724
MsLAC102	WUN-motif	1055
MsLAC102	Myb-binding site	494
MsLAC102	MYB	494
MsLAC102	MYB	941
MsLAC102	MYB	1242
MsLAC102	MYB	1829
MsLAC102	GATA-motif	1219	part of a light responsive element
MsLAC102	TGACG-motif	698	cis-acting regulatory element involved in the MeJA-responsiveness
MsLAC102	TGACG-motif	1724	cis-acting regulatory element involved in the MeJA-responsiveness
MsLAC102	Myc	1441
MsLAC102	ATCT-motif	1066	part of a conserved DNA module involved in light responsiveness
MsLAC102	ERE	556
MsLAC102	W box	207
MsLAC102	STRE	243
MsLAC103	Myc	1444
MsLAC103	GTGGC-motif	1755	part of a light responsive element
MsLAC103	ERE	1145
MsLAC103	GT1-motif	527	light responsive element
MsLAC103	GT1-motif	528	light responsive element
MsLAC103	GT1-motif	730	light responsive element
MsLAC103	GT1-motif	1243	light responsive element
MsLAC103	AAGAA-motif	1542
MsLAC103	LTR	222	cis-acting element involved in low-temperature responsiveness
MsLAC103	MBS	1393	MYB binding site involved in drought-inducibility
MsLAC103	AT-rich element	159	binding site of AT-rich DNA binding protein (ATBP-1)
MsLAC103	AT-rich element	1901	binding site of AT-rich DNA binding protein (ATBP-1)
MsLAC103	AE-box	1586	part of a module for light response
MsLAC103	STRE	1239
MsLAC103	STRE	1630
MsLAC103	STRE	1810
MsLAC103	W box	754
MsLAC103	MYC	189
MsLAC103	MYC	617
MsLAC103	MYC	821
MsLAC103	MYC	1341
MsLAC103	MYC	1769
MsLAC103	MYC	1892
MsLAC103	MYC	1950
MsLAC103	ARE	12	cis-acting regulatory element essential for the anaerobic induction
MsLAC103	ARE	17	cis-acting regulatory element essential for the anaerobic induction
MsLAC103	ARE	1753	cis-acting regulatory element essential for the anaerobic induction
MsLAC103	Myb	54
MsLAC103	Myb	400
MsLAC103	Myb	1393
MsLAC103	Box 4	60	part of a conserved DNA module involved in light responsiveness
MsLAC103	Box 4	925	part of a conserved DNA module involved in light responsiveness
MsLAC103	Box 4	1023	part of a conserved DNA module involved in light responsiveness
MsLAC103	Box 4	1089	part of a conserved DNA module involved in light responsiveness
MsLAC103	MYB	529
MsLAC103	MYB	1318
MsLAC103	MYB	1462
MsLAC103	MYB	1818
MsLAC103	ABRE	633	cis-acting element involved in the abscisic acid responsiveness
MsLAC103	ABRE	727	cis-acting element involved in the abscisic acid responsiveness
MsLAC103	ABRE	837	cis-acting element involved in the abscisic acid responsiveness
MsLAC103	GCN4_motif	621	cis-regulatory element involved in endosperm expression
MsLAC103	Myb-binding site	1462
MsLAC104	AAGAA-motif	1480
MsLAC104	AAGAA-motif	1602
MsLAC104	ERE	76
MsLAC104	GT1-motif	470	light responsive element
MsLAC104	G-box	1945	cis-acting regulatory element involved in light responsiveness
MsLAC104	W box	203
MsLAC104	AE-box	1048	part of a module for light response
MsLAC104	STRE	212
MsLAC104	STRE	964
MsLAC104	TCA	273
MsLAC104	TCA	1102
MsLAC104	TCCC-motif	1982	part of a light responsive element
MsLAC104	CAT-box	189	cis-acting regulatory element related to meristem expression
MsLAC104	CAT-box	1739	cis-acting regulatory element related to meristem expression
MsLAC104	MYC	304
MsLAC104	MYC	1432
MsLAC104	ARE	379	cis-acting regulatory element essential for the anaerobic induction
MsLAC104	ARE	938	cis-acting regulatory element essential for the anaerobic induction
MsLAC104	ARE	1136	cis-acting regulatory element essential for the anaerobic induction
MsLAC104	ARE	1247	cis-acting regulatory element essential for the anaerobic induction
MsLAC104	ARE	1469	cis-acting regulatory element essential for the anaerobic induction
MsLAC104	TCT-motif	1961	part of a light responsive element
MsLAC104	Myb	620
MsLAC104	Myb	1816
MsLAC104	Box 4	434	part of a conserved DNA module involved in light responsiveness
MsLAC104	Box 4	544	part of a conserved DNA module involved in light responsiveness
MsLAC104	Box 4	758	part of a conserved DNA module involved in light responsiveness
MsLAC104	Box 4	1326	part of a conserved DNA module involved in light responsiveness
MsLAC104	Box 4	1395	part of a conserved DNA module involved in light responsiveness
MsLAC104	P-box	208	gibberellin-responsive element
MsLAC104	MYB	469
MsLAC104	MYB	1706
MsLAC104	ABRE	1946	cis-acting element involved in the abscisic acid responsiveness
MsLAC104	TCA-element	1153	cis-acting element involved in salicylic acid responsiveness
MsLAC104	GATA-motif	699	part of a light responsive element
MsLAC105	TCT-motif	901	part of a light responsive element
MsLAC105	TCT-motif	1922	part of a light responsive element
MsLAC105	Box 4	414	part of a conserved DNA module involved in light responsiveness
MsLAC105	Box 4	1270	part of a conserved DNA module involved in light responsiveness
MsLAC105	Box 4	1394	part of a conserved DNA module involved in light responsiveness
MsLAC105	Myb	219
MsLAC105	MYC	599
MsLAC105	MYC	1641
MsLAC105	ARE	916	cis-acting regulatory element essential for the anaerobic induction
MsLAC105	ARE	1905	cis-acting regulatory element essential for the anaerobic induction
MsLAC105	TCA-element	104	cis-acting element involved in salicylic acid responsiveness
MsLAC105	GATA-motif	1946	part of a light responsive element
MsLAC105	MYB	124
MsLAC105	MYB	248
MsLAC105	MYB	398
MsLAC105	MYB	551
MsLAC105	MYB	952
MsLAC105	MYB	1295
MsLAC105	Myb-binding site	124
MsLAC105	Myb-binding site	248
MsLAC105	GT1-motif	552	light responsive element
MsLAC105	GT1-motif	702	light responsive element
MsLAC105	GT1-motif	1948	light responsive element
MsLAC105	GT1-motif	1958	light responsive element
MsLAC105	CCAAT-box	1491	MYBHv1 binding site
MsLAC105	W box	1127
MsLAC105	MYB recognition site	1491
MsLAC105	STRE	477
MsLAC106	MBS	1013	MYB binding site involved in drought-inducibility
MsLAC106	LTR	807	cis-acting element involved in low-temperature responsiveness
MsLAC106	AE-box	1916	part of a module for light response
MsLAC106	STRE	194
MsLAC106	GARE-motif	271	gibberellin-responsive element
MsLAC106	Myc	1430
MsLAC106	AAGAA-motif	1902
MsLAC106	ERE	1131
MsLAC106	ERE	1274
MsLAC106	GT1-motif	871	light responsive element
MsLAC106	GT1-motif	1554	light responsive element
MsLAC106	GT1-motif	1555	light responsive element
MsLAC106	MYB	271
MsLAC106	MYB	769
MsLAC106	MYB	870
MsLAC106	MYB	1384
MsLAC106	MYB	1417
MsLAC106	MYB	1769
MsLAC106	GATA-motif	143	part of a light responsive element
MsLAC106	Myb-binding site	271
MsLAC106	Myb-binding site	769
MsLAC106	AuxRR-core	1196	cis-acting regulatory element involved in auxin responsiveness
MsLAC106	TCA	1800
MsLAC106	CAT-box	60	cis-acting regulatory element related to meristem expression
MsLAC106	MYC	31
MsLAC106	MYC	722
MsLAC106	MYC	728
MsLAC106	MYC	739
MsLAC106	MYC	836
MsLAC106	MYC	1204
MsLAC106	MYC	1326
MsLAC106	ARE	1121	cis-acting regulatory element essential for the anaerobic induction
MsLAC106	TGA-element	1473	auxin-responsive element
MsLAC106	Myb	1013
MsLAC106	Myb	1990
MsLAC106	Box 4	944	part of a conserved DNA module involved in light responsiveness
MsLAC106	Box 4	1341	part of a conserved DNA module involved in light responsiveness
MsLAC106	Box 4	1706	part of a conserved DNA module involved in light responsiveness
MsLAC107	MRE	892	MYB binding site involved in light responsiveness
MsLAC107	MRE	994	MYB binding site involved in light responsiveness
MsLAC107	MRE	1636	MYB binding site involved in light responsiveness
MsLAC107	MRE	1827	MYB binding site involved in light responsiveness
MsLAC107	Box 4	605	part of a conserved DNA module involved in light responsiveness
MsLAC107	Box 4	871	part of a conserved DNA module involved in light responsiveness
MsLAC107	CGTCA-motif	282	cis-acting regulatory element involved in the MeJA-responsiveness
MsLAC107	CGTCA-motif	302	cis-acting regulatory element involved in the MeJA-responsiveness
MsLAC107	CGTCA-motif	330	cis-acting regulatory element involved in the MeJA-responsiveness
MsLAC107	CGTCA-motif	1156	cis-acting regulatory element involved in the MeJA-responsiveness
MsLAC107	CAT-box	420	cis-acting regulatory element related to meristem expression
MsLAC107	CAT-box	1181	cis-acting regulatory element related to meristem expression
MsLAC107	MYC	150
MsLAC107	MYC	247
MsLAC107	MYC	532
MsLAC107	MYC	1201
MsLAC107	MYC	1541
MsLAC107	TCA	960
MsLAC107	TCA	980
MsLAC107	TCA	1410
MsLAC107	ACE	886	cis-acting element involved in light responsiveness
MsLAC107	ACE	997	cis-acting element involved in light responsiveness
MsLAC107	as-1	282
MsLAC107	as-1	302
MsLAC107	as-1	330
MsLAC107	as-1	1156
MsLAC107	WUN-motif	1920
MsLAC107	TGACG-motif	282	cis-acting regulatory element involved in the MeJA-responsiveness
MsLAC107	TGACG-motif	302	cis-acting regulatory element involved in the MeJA-responsiveness
MsLAC107	TGACG-motif	330	cis-acting regulatory element involved in the MeJA-responsiveness
MsLAC107	TGACG-motif	1156	cis-acting regulatory element involved in the MeJA-responsiveness
MsLAC107	MYB	1162
MsLAC107	MYB	1186
MsLAC107	AAGAA-motif	1622
MsLAC107	ERE	1294
MsLAC107	ERE	1296
MsLAC107	GT1-motif	1634	light responsive element
MsLAC107	Myc	1857
MsLAC107	STRE	200
MsLAC107	STRE	445
MsLAC107	STRE	1170
MsLAC107	STRE	1192
MsLAC107	STRE	1670
MsLAC108	ACE	886	cis-acting element involved in light responsiveness
MsLAC108	ACE	997	cis-acting element involved in light responsiveness
MsLAC108	as-1	1156
MsLAC108	WUN-motif	237
MsLAC108	WUN-motif	1920
MsLAC108	TCA-element	334	cis-acting element involved in salicylic acid responsiveness
MsLAC108	TGACG-motif	1156	cis-acting regulatory element involved in the MeJA-responsiveness
MsLAC108	GATA-motif	522	part of a light responsive element
MsLAC108	MYB	465
MsLAC108	MYB	503
MsLAC108	MYB	559
MsLAC108	MYB	1162
MsLAC108	MYB	1186
MsLAC108	CGTCA-motif	1156	cis-acting regulatory element involved in the MeJA-responsiveness
MsLAC108	Box 4	871	part of a conserved DNA module involved in light responsiveness
MsLAC108	MRE	892	MYB binding site involved in light responsiveness
MsLAC108	MRE	994	MYB binding site involved in light responsiveness
MsLAC108	MRE	1636	MYB binding site involved in light responsiveness
MsLAC108	MRE	1827	MYB binding site involved in light responsiveness
MsLAC108	Myb	130
MsLAC108	CAT-box	1181	cis-acting regulatory element related to meristem expression
MsLAC108	MYC	137
MsLAC108	MYC	1201
MsLAC108	MYC	1541
MsLAC108	TCCC-motif	6	part of a light responsive element
MsLAC108	TCCC-motif	544	part of a light responsive element
MsLAC108	TCA	960
MsLAC108	TCA	980
MsLAC108	TCA	1410
MsLAC108	STRE	491
MsLAC108	STRE	1170
MsLAC108	STRE	1192
MsLAC108	STRE	1670
MsLAC108	AAGAA-motif	152
MsLAC108	AAGAA-motif	1622
MsLAC108	GT1-motif	703	light responsive element
MsLAC108	GT1-motif	1634	light responsive element
MsLAC108	ERE	630
MsLAC108	ERE	1294
MsLAC108	ERE	1296
MsLAC108	Myc	1857
MsLAC109	STRE	1596
MsLAC109	W box	211
MsLAC109	G-box	204	cis-acting regulatory element involved in light responsiveness
MsLAC109	G-box	1254	cis-acting regulatory element involved in light responsiveness
MsLAC109	MBS	754	MYB binding site involved in drought-inducibility
MsLAC109	MBS	984	MYB binding site involved in drought-inducibility
MsLAC109	TATC-box	1416	cis-acting element involved in gibberellin-responsiveness
MsLAC109	ERE	29
MsLAC109	ERE	337
MsLAC109	AAGAA-motif	1722
MsLAC109	as-1	65
MsLAC109	as-1	266
MsLAC109	as-1	513
MsLAC109	as-1	571
MsLAC109	DRE core	903
MsLAC109	Myb-binding site	1142
MsLAC109	MYB	404
MsLAC109	MYB	628
MsLAC109	MYB	1142
MsLAC109	CARE	521
MsLAC109	TGACG-motif	65	cis-acting regulatory element involved in the MeJA-responsiveness
MsLAC109	TGACG-motif	266	cis-acting regulatory element involved in the MeJA-responsiveness
MsLAC109	TGACG-motif	513	cis-acting regulatory element involved in the MeJA-responsiveness
MsLAC109	TGACG-motif	571	cis-acting regulatory element involved in the MeJA-responsiveness
MsLAC109	ABRE	204	cis-acting element involved in the abscisic acid responsiveness
MsLAC109	ABRE	1254	cis-acting element involved in the abscisic acid responsiveness
MsLAC109	MYC	373
MsLAC109	MYC	398
MsLAC109	MYC	1180
MsLAC109	MYC	1674
MsLAC109	ARE	580	cis-acting regulatory element essential for the anaerobic induction
MsLAC109	ARE	1639	cis-acting regulatory element essential for the anaerobic induction
MsLAC109	CAT-box	328	cis-acting regulatory element related to meristem expression
MsLAC109	CAT-box	1381	cis-acting regulatory element related to meristem expression
MsLAC109	Myb	754
MsLAC109	Myb	984
MsLAC109	TGA-element	979	auxin-responsive element
MsLAC109	Box 4	1034	part of a conserved DNA module involved in light responsiveness
MsLAC109	Box 4	1206	part of a conserved DNA module involved in light responsiveness
MsLAC109	CGTCA-motif	65	cis-acting regulatory element involved in the MeJA-responsiveness
MsLAC109	CGTCA-motif	266	cis-acting regulatory element involved in the MeJA-responsiveness
MsLAC109	CGTCA-motif	513	cis-acting regulatory element involved in the MeJA-responsiveness
MsLAC109	CGTCA-motif	571	cis-acting regulatory element involved in the MeJA-responsiveness
MsLAC11	STRE	1438
MsLAC11	W box	1298
MsLAC11	G-box	16	cis-acting regulatory element involved in light responsiveness
MsLAC11	G-box	1095	cis-acting regulatory element involved in light responsiveness
MsLAC11	AAGAA-motif	937
MsLAC11	AAGAA-motif	949
MsLAC11	ATCT-motif	1217	part of a conserved DNA module involved in light responsiveness
MsLAC11	ATCT-motif	1387	part of a conserved DNA module involved in light responsiveness
MsLAC11	WUN-motif	100
MsLAC11	as-1	991
MsLAC11	as-1	1447
MsLAC11	TGACG-motif	991	cis-acting regulatory element involved in the MeJA-responsiveness
MsLAC11	TGACG-motif	1447	cis-acting regulatory element involved in the MeJA-responsiveness
MsLAC11	GATA-motif	1620	part of a light responsive element
MsLAC11	ABRE	16	cis-acting element involved in the abscisic acid responsiveness
MsLAC11	MYB	976
MsLAC11	CGTCA-motif	991	cis-acting regulatory element involved in the MeJA-responsiveness
MsLAC11	CGTCA-motif	1447	cis-acting regulatory element involved in the MeJA-responsiveness
MsLAC11	Myb	1489
MsLAC11	MRE	475	MYB binding site involved in light responsiveness
MsLAC11	Box 4	1156	part of a conserved DNA module involved in light responsiveness
MsLAC11	Box 4	1364	part of a conserved DNA module involved in light responsiveness
MsLAC11	Box 4	1545	part of a conserved DNA module involved in light responsiveness
MsLAC11	TC-rich repeats	949	cis-acting element involved in defense and stress responsiveness
MsLAC11	TCT-motif	184	part of a light responsive element
MsLAC11	TCT-motif	881	part of a light responsive element
MsLAC11	TCT-motif	962	part of a light responsive element
MsLAC11	MYC	311
MsLAC11	MYC	856
MsLAC11	MYC	972
MsLAC110	W box	205
MsLAC110	STRE	241
MsLAC110	Myc	1438
MsLAC110	ATCT-motif	1063	part of a conserved DNA module involved in light responsiveness
MsLAC110	ERE	553
MsLAC110	ERE	895
MsLAC110	ERE	897
MsLAC110	as-1	695
MsLAC110	as-1	1724
MsLAC110	WUN-motif	1052
MsLAC110	Myb-binding site	491
MsLAC110	MYB	92
MsLAC110	MYB	491
MsLAC110	MYB	938
MsLAC110	MYB	1239
MsLAC110	MYB	1829
MsLAC110	GATA-motif	1216	part of a light responsive element
MsLAC110	TGACG-motif	695	cis-acting regulatory element involved in the MeJA-responsiveness
MsLAC110	TGACG-motif	1724	cis-acting regulatory element involved in the MeJA-responsiveness
MsLAC110	MYC	736
MsLAC110	MYC	946
MsLAC110	MYC	1720
MsLAC110	MYC	1760
MsLAC110	TC-rich repeats	630	cis-acting element involved in defense and stress responsiveness
MsLAC110	Box 4	161	part of a conserved DNA module involved in light responsiveness
MsLAC110	Box 4	233	part of a conserved DNA module involved in light responsiveness
MsLAC110	Box 4	432	part of a conserved DNA module involved in light responsiveness
MsLAC110	Box 4	1077	part of a conserved DNA module involved in light responsiveness
MsLAC110	Box 4	1196	part of a conserved DNA module involved in light responsiveness
MsLAC110	Box 4	1555	part of a conserved DNA module involved in light responsiveness
MsLAC110	CGTCA-motif	695	cis-acting regulatory element involved in the MeJA-responsiveness
MsLAC110	CGTCA-motif	1724	cis-acting regulatory element involved in the MeJA-responsiveness
MsLAC111	as-1	372
MsLAC111	as-1	395
MsLAC111	MYB	898
MsLAC111	MYB	957
MsLAC111	MYB	1324
MsLAC111	MYB	1822
MsLAC111	TGA-box	395	part of an auxin-responsive element
MsLAC111	TGACG-motif	372	cis-acting regulatory element involved in the MeJA-responsiveness
MsLAC111	TGACG-motif	395	cis-acting regulatory element involved in the MeJA-responsiveness
MsLAC111	ABRE	370	cis-acting element involved in the abscisic acid responsiveness
MsLAC111	MYC	155
MsLAC111	MYC	300
MsLAC111	MYC	649
MsLAC111	MYC	1347
MsLAC111	MYC	1773
MsLAC111	MYC	1892
MsLAC111	MYC	1950
MsLAC111	ARE	78	cis-acting regulatory element essential for the anaerobic induction
MsLAC111	ARE	116	cis-acting regulatory element essential for the anaerobic induction
MsLAC111	ARE	414	cis-acting regulatory element essential for the anaerobic induction
MsLAC111	ARE	471	cis-acting regulatory element essential for the anaerobic induction
MsLAC111	ARE	1757	cis-acting regulatory element essential for the anaerobic induction
MsLAC111	Box 4	290	part of a conserved DNA module involved in light responsiveness
MsLAC111	Box 4	520	part of a conserved DNA module involved in light responsiveness
MsLAC111	Box 4	1024	part of a conserved DNA module involved in light responsiveness
MsLAC111	Box 4	1090	part of a conserved DNA module involved in light responsiveness
MsLAC111	Myb	864
MsLAC111	Myb	1399
MsLAC111	CGTCA-motif	372	cis-acting regulatory element involved in the MeJA-responsiveness
MsLAC111	CGTCA-motif	395	cis-acting regulatory element involved in the MeJA-responsiveness
MsLAC111	AE-box	1590	part of a module for light response
MsLAC111	STRE	1245
MsLAC111	STRE	1634
MsLAC111	STRE	1814
MsLAC111	LTR	682	cis-acting element involved in low-temperature responsiveness
MsLAC111	G-box	370	cis-acting regulatory element involved in light responsiveness
MsLAC111	MBS	1399	MYB binding site involved in drought-inducibility
MsLAC111	AT-rich element	1901	binding site of AT-rich DNA binding protein (ATBP-1)
MsLAC111	Myc	1450
MsLAC111	GTGGC-motif	1759	part of a light responsive element
MsLAC111	ERE	282
MsLAC111	ERE	1145
MsLAC111	GT1-motif	955	light responsive element
MsLAC111	GT1-motif	956	light responsive element
MsLAC111	GT1-motif	1249	light responsive element
MsLAC111	AT1-motif	60	part of a light responsive module
MsLAC112	AAGAA-motif	303
MsLAC112	ERE	290
MsLAC112	ERE	292
MsLAC112	ERE	1085
MsLAC112	GT1-motif	1478	light responsive element
MsLAC112	W box	1212
MsLAC112	STRE	284
MsLAC112	STRE	890
MsLAC112	STRE	932
MsLAC112	STRE	1221
MsLAC112	G-Box	568	cis-acting regulatory element involved in light responsiveness
MsLAC112	CAT-box	1198	cis-acting regulatory element related to meristem expression
MsLAC112	ARE	1976	cis-acting regulatory element essential for the anaerobic induction
MsLAC112	MYC	329
MsLAC112	MYC	783
MsLAC112	MYC	1313
MsLAC112	TCT-motif	124	part of a light responsive element
MsLAC112	TC-rich repeats	124	cis-acting element involved in defense and stress responsiveness
MsLAC112	TC-rich repeats	750	cis-acting element involved in defense and stress responsiveness
MsLAC112	Myb	1628
MsLAC112	Box 4	602	part of a conserved DNA module involved in light responsiveness
MsLAC112	Box 4	1442	part of a conserved DNA module involved in light responsiveness
MsLAC112	Box 4	1552	part of a conserved DNA module involved in light responsiveness
MsLAC112	Box 4	1758	part of a conserved DNA module involved in light responsiveness
MsLAC112	TCA	1282
MsLAC112	WUN-motif	553	wound-responsive element
MsLAC112	P-box	1217	gibberellin-responsive element
MsLAC112	MYB	1477
MsLAC112	MYB	1873
MsLAC112	ABRE	568	cis-acting element involved in the abscisic acid responsiveness
MsLAC112	TCA-element	941	cis-acting element involved in salicylic acid responsiveness
MsLAC112	GATA-motif	33	part of a light responsive element
MsLAC112	GATA-motif	104	part of a light responsive element
MsLAC112	GATA-motif	934	part of a light responsive element
MsLAC113	CCAAT-box	1488	MYBHv1 binding site
MsLAC113	STRE	478
MsLAC113	W box	1126
MsLAC113	MYB recognition site	1488
MsLAC113	GT1-motif	553	light responsive element
MsLAC113	GT1-motif	704	light responsive element
MsLAC113	GT1-motif	1943	light responsive element
MsLAC113	GATA-motif	1941	part of a light responsive element
MsLAC113	TCA-element	105	cis-acting element involved in salicylic acid responsiveness
MsLAC113	TCA-element	1357	cis-acting element involved in salicylic acid responsiveness
MsLAC113	MYB	125
MsLAC113	MYB	249
MsLAC113	MYB	399
MsLAC113	MYB	552
MsLAC113	MYB	951
MsLAC113	Myb-binding site	125
MsLAC113	Myb-binding site	249
MsLAC113	Box 4	415	part of a conserved DNA module involved in light responsiveness
MsLAC113	Box 4	1269	part of a conserved DNA module involved in light responsiveness
MsLAC113	Box 4	1393	part of a conserved DNA module involved in light responsiveness
MsLAC113	TGA-element	1296	auxin-responsive element
MsLAC113	Myb	220
MsLAC113	TCT-motif	900	part of a light responsive element
MsLAC113	TCT-motif	1917	part of a light responsive element
MsLAC113	ARE	915	cis-acting regulatory element essential for the anaerobic induction
MsLAC113	ARE	1900	cis-acting regulatory element essential for the anaerobic induction
MsLAC113	MYC	601
MsLAC113	MYC	1636
MsLAC114	G-box	275	cis-acting regulatory element involved in light responsiveness
MsLAC114	W box	1617
MsLAC114	STRE	222
MsLAC114	STRE	652
MsLAC114	STRE	1209
MsLAC114	STRE	1570
MsLAC114	AE-box	1916	part of a module for light response
MsLAC114	Myc	579
MsLAC114	AAGAA-motif	381
MsLAC114	AAGAA-motif	663
MsLAC114	AAGAA-motif	904
MsLAC114	AAGAA-motif	1902
MsLAC114	GT1-motif	1011	light responsive element
MsLAC114	GT1-motif	1196	light responsive element
MsLAC114	ERE	562
MsLAC114	ERE	1335
MsLAC114	P-box	729	gibberellin-responsive element
MsLAC114	MYB	1012
MsLAC114	MYB	1197
MsLAC114	MYB	1772
MsLAC114	TCA-element	913	cis-acting element involved in salicylic acid responsiveness
MsLAC114	ABRE	275	cis-acting element involved in the abscisic acid responsiveness
MsLAC114	ABRE	1321	cis-acting element involved in the abscisic acid responsiveness
MsLAC114	WUN-motif	383
MsLAC114	WUN-motif	1474
MsLAC114	MBSI	446	MYB binding site involved in flavonoid biosynthetic genes regulation
MsLAC114	AuxRR-core	423	cis-acting regulatory element involved in auxin responsiveness
MsLAC114	TCA	1803
MsLAC114	CCGTCC motif	749
MsLAC114	CCGTCC motif	1419
MsLAC114	CCGTCC motif	1631
MsLAC114	MYC	1161
MsLAC114	MYC	1368
MsLAC114	ARE	541	cis-acting regulatory element essential for the anaerobic induction
MsLAC114	ARE	1606	cis-acting regulatory element essential for the anaerobic induction
MsLAC114	CCGTCC-box	749
MsLAC114	CCGTCC-box	1419
MsLAC114	CCGTCC-box	1631
MsLAC114	Box 4	671	part of a conserved DNA module involved in light responsiveness
MsLAC114	Box 4	675	part of a conserved DNA module involved in light responsiveness
MsLAC114	Box 4	1709	part of a conserved DNA module involved in light responsiveness
MsLAC114	Myb	452
MsLAC114	Myb	1316
MsLAC114	Myb	1430
MsLAC114	Myb	1466
MsLAC115	CCAAT-box	16	MYBHv1 binding site
MsLAC115	G-Box	1566	cis-acting regulatory element involved in light responsiveness
MsLAC115	MBS	112	MYB binding site involved in drought-inducibility
MsLAC115	STRE	541
MsLAC115	STRE	1019
MsLAC115	MYB recognition site	16
MsLAC115	W box	1506
MsLAC115	ERE	643
MsLAC115	ERE	645
MsLAC115	ERE	1938
MsLAC115	GT1-motif	983	light responsive element
MsLAC115	AAGAA-motif	971
MsLAC115	AAGAA-motif	1912
MsLAC115	Myc	1206
MsLAC115	ABRE	1567	cis-acting element involved in the abscisic acid responsiveness
MsLAC115	TCA-element	1582	cis-acting element involved in salicylic acid responsiveness
MsLAC115	MYB	1432
MsLAC115	Myb-binding site	1432
MsLAC115	WUN-motif	1269
MsLAC115	TCA	759
MsLAC115	Box 4	1966	part of a conserved DNA module involved in light responsiveness
MsLAC115	Myb	112
MsLAC115	MRE	985	MYB binding site involved in light responsiveness
MsLAC115	MRE	1176	MYB binding site involved in light responsiveness
MsLAC115	MYC	382
MsLAC115	MYC	550
MsLAC115	MYC	890
MsLAC115	MYC	1860
MsLAC115	ARE	1406	cis-acting regulatory element essential for the anaerobic induction
MsLAC116	ABRE	206	cis-acting element involved in the abscisic acid responsiveness
MsLAC116	ABRE	1264	cis-acting element involved in the abscisic acid responsiveness
MsLAC116	TGACG-motif	67	cis-acting regulatory element involved in the MeJA-responsiveness
MsLAC116	TGACG-motif	536	cis-acting regulatory element involved in the MeJA-responsiveness
MsLAC116	TGACG-motif	588	cis-acting regulatory element involved in the MeJA-responsiveness
MsLAC116	CARE	544
MsLAC116	MYB	426
MsLAC116	MYB	1152
MsLAC116	Myb-binding site	1152
MsLAC116	DRE core	921
MsLAC116	as-1	67
MsLAC116	as-1	536
MsLAC116	as-1	588
MsLAC116	CGTCA-motif	67	cis-acting regulatory element involved in the MeJA-responsiveness
MsLAC116	CGTCA-motif	536	cis-acting regulatory element involved in the MeJA-responsiveness
MsLAC116	CGTCA-motif	588	cis-acting regulatory element involved in the MeJA-responsiveness
MsLAC116	Myb	772
MsLAC116	Myb	1002
MsLAC116	TGA-element	997	auxin-responsive element
MsLAC116	Box 4	1052	part of a conserved DNA module involved in light responsiveness
MsLAC116	Box 4	1216	part of a conserved DNA module involved in light responsiveness
MsLAC116	CAT-box	350	cis-acting regulatory element related to meristem expression
MsLAC116	CAT-box	1391	cis-acting regulatory element related to meristem expression
MsLAC116	ARE	597	cis-acting regulatory element essential for the anaerobic induction
MsLAC116	ARE	1649	cis-acting regulatory element essential for the anaerobic induction
MsLAC116	MYC	395
MsLAC116	MYC	420
MsLAC116	MYC	1190
MsLAC116	MYC	1684
MsLAC116	TATC-box	1426	cis-acting element involved in gibberellin-responsiveness
MsLAC116	MBS	772	MYB binding site involved in drought-inducibility
MsLAC116	MBS	1002	MYB binding site involved in drought-inducibility
MsLAC116	G-box	206	cis-acting regulatory element involved in light responsiveness
MsLAC116	G-box	1264	cis-acting regulatory element involved in light responsiveness
MsLAC116	W box	213
MsLAC116	STRE	1606
MsLAC116	AAGAA-motif	1732
MsLAC116	ERE	31
MsLAC116	ERE	359
MsLAC117	W box	346
MsLAC117	Myb-binding site	644
MsLAC117	STRE	382
MsLAC117	STRE	482
MsLAC117	as-1	848
MsLAC117	WUN-motif	1205
MsLAC117	WUN-motif	1712	wound-responsive element
MsLAC117	TGACG-motif	848	cis-acting regulatory element involved in the MeJA-responsiveness
MsLAC117	GATA-motif	1369	part of a light responsive element
MsLAC117	MYB	145
MsLAC117	MYB	644
MsLAC117	MYB	1091
MsLAC117	MYB	1392
MsLAC117	MYB	1748
MsLAC117	MYB	1826
MsLAC117	ATCT-motif	1216	part of a conserved DNA module involved in light responsiveness
MsLAC117	TC-rich repeats	783	cis-acting element involved in defense and stress responsiveness
MsLAC117	CGTCA-motif	848	cis-acting regulatory element involved in the MeJA-responsiveness
MsLAC117	Box 4	302	part of a conserved DNA module involved in light responsiveness
MsLAC117	Box 4	374	part of a conserved DNA module involved in light responsiveness
MsLAC117	Box 4	575	part of a conserved DNA module involved in light responsiveness
MsLAC117	Box 4	1230	part of a conserved DNA module involved in light responsiveness
MsLAC117	Box 4	1349	part of a conserved DNA module involved in light responsiveness
MsLAC117	ERE	706
MsLAC117	ERE	1736
MsLAC117	MYC	110
MsLAC117	MYC	889
MsLAC117	MYC	1099
MsLAC118	MYC	100
MsLAC118	MYC	592
MsLAC118	MYC	1277
MsLAC118	MYC	1769
MsLAC118	MYC	1892
MsLAC118	MYC	1950
MsLAC118	ARE	23	cis-acting regulatory element essential for the anaerobic induction
MsLAC118	ARE	61	cis-acting regulatory element essential for the anaerobic induction
MsLAC118	ARE	346	cis-acting regulatory element essential for the anaerobic induction
MsLAC118	ARE	403	cis-acting regulatory element essential for the anaerobic induction
MsLAC118	ARE	408	cis-acting regulatory element essential for the anaerobic induction
MsLAC118	ARE	1753	cis-acting regulatory element essential for the anaerobic induction
MsLAC118	Box 4	229	part of a conserved DNA module involved in light responsiveness
MsLAC118	Box 4	452	part of a conserved DNA module involved in light responsiveness
MsLAC118	Box 4	963	part of a conserved DNA module involved in light responsiveness
MsLAC118	Box 4	1029	part of a conserved DNA module involved in light responsiveness
MsLAC118	Box 4	1301	part of a conserved DNA module involved in light responsiveness
MsLAC118	Myb	804
MsLAC118	Myb	1395
MsLAC118	CGTCA-motif	304	cis-acting regulatory element involved in the MeJA-responsiveness
MsLAC118	CGTCA-motif	327	cis-acting regulatory element involved in the MeJA-responsiveness
MsLAC118	as-1	304
MsLAC118	as-1	327
MsLAC118	Myb-binding site	1464
MsLAC118	TGA-box	327	part of an auxin-responsive element
MsLAC118	MYB	838
MsLAC118	MYB	897
MsLAC118	MYB	1254
MsLAC118	MYB	1464
MsLAC118	MYB	1818
MsLAC118	ABRE	302	cis-acting element involved in the abscisic acid responsiveness
MsLAC118	TGACG-motif	304	cis-acting regulatory element involved in the MeJA-responsiveness
MsLAC118	TGACG-motif	327	cis-acting regulatory element involved in the MeJA-responsiveness
MsLAC118	GTGGC-motif	1755	part of a light responsive element
MsLAC118	Myc	1446
MsLAC118	AAGAA-motif	1344
MsLAC118	ERE	221
MsLAC118	ERE	1084
MsLAC118	GT1-motif	895	light responsive element
MsLAC118	GT1-motif	896	light responsive element
MsLAC118	GT1-motif	1179	light responsive element
MsLAC118	AT1-motif	5	part of a light responsive module
MsLAC118	AE-box	1588	part of a module for light response
MsLAC118	STRE	1175
MsLAC118	STRE	1632
MsLAC118	MBS	1395	MYB binding site involved in drought-inducibility
MsLAC118	LTR	626	cis-acting element involved in low-temperature responsiveness
MsLAC118	G-box	302	cis-acting regulatory element involved in light responsiveness
MsLAC118	AT-rich element	562	binding site of AT-rich DNA binding protein (ATBP-1)
MsLAC119	TCA-element	617	cis-acting element involved in salicylic acid responsiveness
MsLAC119	GATA-motif	163	part of a light responsive element
MsLAC119	CCAAT-box	1737	MYBHv1 binding site
MsLAC119	MYB	1168
MsLAC119	MBSI	1275	MYB binding site involved in flavonoid biosynthetic genes regulation
MsLAC119	MYB recognition site	1737
MsLAC119	AE-box	512	part of a module for light response
MsLAC119	STRE	428
MsLAC119	TCA	566
MsLAC119	AAGAA-motif	944
MsLAC119	AAGAA-motif	1066
MsLAC119	Box 4	4	part of a conserved DNA module involved in light responsiveness
MsLAC119	Box 4	222	part of a conserved DNA module involved in light responsiveness
MsLAC119	Box 4	790	part of a conserved DNA module involved in light responsiveness
MsLAC119	Box 4	859	part of a conserved DNA module involved in light responsiveness
MsLAC119	Box 4	1538	part of a conserved DNA module involved in light responsiveness
MsLAC119	Box 4	1943	part of a conserved DNA module involved in light responsiveness
MsLAC119	Box 4	1984	part of a conserved DNA module involved in light responsiveness
MsLAC119	Myb	84
MsLAC119	Myb	1281
MsLAC119	CAT-box	1203	cis-acting regulatory element related to meristem expression
MsLAC119	Myc	1994
MsLAC119	MYC	896
MsLAC119	MYC	1500
MsLAC119	ARE	402	cis-acting regulatory element essential for the anaerobic induction
MsLAC119	ARE	600	cis-acting regulatory element essential for the anaerobic induction
MsLAC119	ARE	711	cis-acting regulatory element essential for the anaerobic induction
MsLAC119	ARE	933	cis-acting regulatory element essential for the anaerobic induction
MsLAC12	as-1	1641
MsLAC12	WUN-motif	292
MsLAC12	TGACG-motif	1641	cis-acting regulatory element involved in the MeJA-responsiveness
MsLAC12	ABRE	56	cis-acting element involved in the abscisic acid responsiveness
MsLAC12	MYB	1168
MsLAC12	CGTCA-motif	1641	cis-acting regulatory element involved in the MeJA-responsiveness
MsLAC12	Box 4	176	part of a conserved DNA module involved in light responsiveness
MsLAC12	Box 4	1355	part of a conserved DNA module involved in light responsiveness
MsLAC12	Box 4	1558	part of a conserved DNA module involved in light responsiveness
MsLAC12	Box 4	1739	part of a conserved DNA module involved in light responsiveness
MsLAC12	MRE	667	MYB binding site involved in light responsiveness
MsLAC12	Myb	1683
MsLAC12	TC-rich repeats	1141	cis-acting element involved in defense and stress responsiveness
MsLAC12	TCT-motif	376	part of a light responsive element
MsLAC12	TCT-motif	1073	part of a light responsive element
MsLAC12	TCT-motif	1154	part of a light responsive element
MsLAC12	MYC	80
MsLAC12	MYC	503
MsLAC12	MYC	1164
MsLAC12	ARE	37	cis-acting regulatory element essential for the anaerobic induction
MsLAC12	STRE	127
MsLAC12	STRE	1632
MsLAC12	W box	190
MsLAC12	W box	1182
MsLAC12	W box	1492
MsLAC12	G-box	1294	cis-acting regulatory element involved in light responsiveness
MsLAC12	AAGAA-motif	1129
MsLAC12	AAGAA-motif	1141
MsLAC12	ATCT-motif	1411	part of a conserved DNA module involved in light responsiveness
MsLAC12	ATCT-motif	1581	part of a conserved DNA module involved in light responsiveness
MsLAC120	ARE	910	cis-acting regulatory element essential for the anaerobic induction
MsLAC120	ARE	1900	cis-acting regulatory element essential for the anaerobic induction
MsLAC120	MYC	1636
MsLAC120	TCT-motif	731	part of a light responsive element
MsLAC120	TCT-motif	895	part of a light responsive element
MsLAC120	TCT-motif	1917	part of a light responsive element
MsLAC120	CGTCA-motif	3	cis-acting regulatory element involved in the MeJA-responsiveness
MsLAC120	CGTCA-motif	157	cis-acting regulatory element involved in the MeJA-responsiveness
MsLAC120	Box 4	445	part of a conserved DNA module involved in light responsiveness
MsLAC120	Box 4	1397	part of a conserved DNA module involved in light responsiveness
MsLAC120	Myb	248
MsLAC120	Myb	713
MsLAC120	MYB	24
MsLAC120	MYB	429
MsLAC120	MYB	947
MsLAC120	MYB	1296
MsLAC120	GATA-motif	145	part of a light responsive element
MsLAC120	GATA-motif	1941	part of a light responsive element
MsLAC120	TGACG-motif	3	cis-acting regulatory element involved in the MeJA-responsiveness
MsLAC120	TGACG-motif	157	cis-acting regulatory element involved in the MeJA-responsiveness
MsLAC120	as-1	3
MsLAC120	as-1	157
MsLAC120	Myc	732
MsLAC120	GT1-motif	1943	light responsive element
MsLAC120	MBS	713	MYB binding site involved in drought-inducibility
MsLAC120	CCAAT-box	1489	MYBHv1 binding site
MsLAC120	MYB recognition site	1489
MsLAC120	W box	745
MsLAC120	STRE	493
MsLAC121	ACE	997	cis-acting element involved in light responsiveness
MsLAC121	as-1	347
MsLAC121	as-1	367
MsLAC121	as-1	1156
MsLAC121	WUN-motif	1920
MsLAC121	TGACG-motif	347	cis-acting regulatory element involved in the MeJA-responsiveness
MsLAC121	TGACG-motif	367	cis-acting regulatory element involved in the MeJA-responsiveness
MsLAC121	TGACG-motif	1156	cis-acting regulatory element involved in the MeJA-responsiveness
MsLAC121	MYB	1162
MsLAC121	MYB	1186
MsLAC121	MRE	29	MYB binding site involved in light responsiveness
MsLAC121	MRE	994	MYB binding site involved in light responsiveness
MsLAC121	MRE	1636	MYB binding site involved in light responsiveness
MsLAC121	MRE	1827	MYB binding site involved in light responsiveness
MsLAC121	Box 4	642	part of a conserved DNA module involved in light responsiveness
MsLAC121	CGTCA-motif	347	cis-acting regulatory element involved in the MeJA-responsiveness
MsLAC121	CGTCA-motif	367	cis-acting regulatory element involved in the MeJA-responsiveness
MsLAC121	CGTCA-motif	1156	cis-acting regulatory element involved in the MeJA-responsiveness
MsLAC121	MYC	214
MsLAC121	MYC	312
MsLAC121	MYC	569
MsLAC121	MYC	1201
MsLAC121	MYC	1541
MsLAC121	CAT-box	457	cis-acting regulatory element related to meristem expression
MsLAC121	CAT-box	1181	cis-acting regulatory element related to meristem expression
MsLAC121	TCA	960
MsLAC121	TCA	980
MsLAC121	TCA	1410
MsLAC121	STRE	265
MsLAC121	STRE	482
MsLAC121	STRE	1170
MsLAC121	STRE	1192
MsLAC121	STRE	1670
MsLAC121	ERE	1294
MsLAC121	ERE	1296
MsLAC121	GT1-motif	1634	light responsive element
MsLAC121	AAGAA-motif	1622
MsLAC121	Myc	1857
MsLAC122	AAGAA-motif	1732
MsLAC122	ERE	51
MsLAC122	ERE	359
MsLAC122	W box	233
MsLAC122	STRE	1606
MsLAC122	TATC-box	1426	cis-acting element involved in gibberellin-responsiveness
MsLAC122	MBS	772	MYB binding site involved in drought-inducibility
MsLAC122	MBS	1002	MYB binding site involved in drought-inducibility
MsLAC122	G-box	64	cis-acting regulatory element involved in light responsiveness
MsLAC122	G-box	226	cis-acting regulatory element involved in light responsiveness
MsLAC122	G-box	1264	cis-acting regulatory element involved in light responsiveness
MsLAC122	TGA-element	997	auxin-responsive element
MsLAC122	Box 4	1052	part of a conserved DNA module involved in light responsiveness
MsLAC122	Box 4	1216	part of a conserved DNA module involved in light responsiveness
MsLAC122	Myb	268
MsLAC122	Myb	772
MsLAC122	Myb	1002
MsLAC122	CGTCA-motif	66	cis-acting regulatory element involved in the MeJA-responsiveness
MsLAC122	CGTCA-motif	87	cis-acting regulatory element involved in the MeJA-responsiveness
MsLAC122	CGTCA-motif	288	cis-acting regulatory element involved in the MeJA-responsiveness
MsLAC122	CGTCA-motif	536	cis-acting regulatory element involved in the MeJA-responsiveness
MsLAC122	CGTCA-motif	588	cis-acting regulatory element involved in the MeJA-responsiveness
MsLAC122	CAT-box	350	cis-acting regulatory element related to meristem expression
MsLAC122	CAT-box	1391	cis-acting regulatory element related to meristem expression
MsLAC122	ARE	597	cis-acting regulatory element essential for the anaerobic induction
MsLAC122	ARE	1649	cis-acting regulatory element essential for the anaerobic induction
MsLAC122	MYC	394
MsLAC122	MYC	419
MsLAC122	MYC	1190
MsLAC122	MYC	1684
MsLAC122	Myb-binding site	1152
MsLAC122	as-1	66
MsLAC122	as-1	87
MsLAC122	as-1	288
MsLAC122	as-1	536
MsLAC122	as-1	588
MsLAC122	DRE core	921
MsLAC122	ABRE	64	cis-acting element involved in the abscisic acid responsiveness
MsLAC122	ABRE	226	cis-acting element involved in the abscisic acid responsiveness
MsLAC122	ABRE	1264	cis-acting element involved in the abscisic acid responsiveness
MsLAC122	TGACG-motif	66	cis-acting regulatory element involved in the MeJA-responsiveness
MsLAC122	TGACG-motif	87	cis-acting regulatory element involved in the MeJA-responsiveness
MsLAC122	TGACG-motif	288	cis-acting regulatory element involved in the MeJA-responsiveness
MsLAC122	TGACG-motif	536	cis-acting regulatory element involved in the MeJA-responsiveness
MsLAC122	TGACG-motif	588	cis-acting regulatory element involved in the MeJA-responsiveness
MsLAC122	CARE	544
MsLAC122	MYB	425
MsLAC122	MYB	1152
MsLAC123	STRE	240
MsLAC123	W box	204
MsLAC123	ERE	555
MsLAC123	ERE	897
MsLAC123	ERE	899
MsLAC123	ATCT-motif	1065	part of a conserved DNA module involved in light responsiveness
MsLAC123	Myc	1440
MsLAC123	GATA-motif	1218	part of a light responsive element
MsLAC123	TGACG-motif	697	cis-acting regulatory element involved in the MeJA-responsiveness
MsLAC123	TGACG-motif	1724	cis-acting regulatory element involved in the MeJA-responsiveness
MsLAC123	MYB	91
MsLAC123	MYB	493
MsLAC123	MYB	940
MsLAC123	MYB	1241
MsLAC123	MYB	1829
MsLAC123	Myb-binding site	493
MsLAC123	as-1	697
MsLAC123	as-1	1724
MsLAC123	WUN-motif	1054
MsLAC123	CGTCA-motif	697	cis-acting regulatory element involved in the MeJA-responsiveness
MsLAC123	CGTCA-motif	1724	cis-acting regulatory element involved in the MeJA-responsiveness
MsLAC123	Box 4	160	part of a conserved DNA module involved in light responsiveness
MsLAC123	Box 4	232	part of a conserved DNA module involved in light responsiveness
MsLAC123	Box 4	434	part of a conserved DNA module involved in light responsiveness
MsLAC123	Box 4	1079	part of a conserved DNA module involved in light responsiveness
MsLAC123	Box 4	1198	part of a conserved DNA module involved in light responsiveness
MsLAC123	Box 4	1557	part of a conserved DNA module involved in light responsiveness
MsLAC123	TC-rich repeats	632	cis-acting element involved in defense and stress responsiveness
MsLAC123	MYC	738
MsLAC123	MYC	948
MsLAC123	MYC	1720
MsLAC123	MYC	1760
MsLAC124	CAT-box	1151	cis-acting regulatory element related to meristem expression
MsLAC124	CAT-box	1265	cis-acting regulatory element related to meristem expression
MsLAC124	MYC	567
MsLAC124	MYC	1769
MsLAC124	MYC	1950
MsLAC124	ARE	1753	cis-acting regulatory element essential for the anaerobic induction
MsLAC124	Box 4	271	part of a conserved DNA module involved in light responsiveness
MsLAC124	Box 4	337	part of a conserved DNA module involved in light responsiveness
MsLAC124	Box 4	505	part of a conserved DNA module involved in light responsiveness
MsLAC124	Box 4	866	part of a conserved DNA module involved in light responsiveness
MsLAC124	Box 4	1273	part of a conserved DNA module involved in light responsiveness
MsLAC124	Myb	75
MsLAC124	MYB	204
MsLAC124	MYB	540
MsLAC124	MYB	1066
MsLAC124	MYB	1819
MsLAC124	ABRE	686	cis-acting element involved in the abscisic acid responsiveness
MsLAC124	ABRE	1117	cis-acting element involved in the abscisic acid responsiveness
MsLAC124	GATA-motif	1852	part of a light responsive element
MsLAC124	GT1-motif	202	light responsive element
MsLAC124	GT1-motif	203	light responsive element
MsLAC124	MYB recognition site	634
MsLAC124	W box	1501
MsLAC124	STRE	1225
MsLAC124	STRE	1631
MsLAC124	STRE	1811
MsLAC124	AE-box	1587	part of a module for light response
MsLAC124	G-Box	685	cis-acting regulatory element involved in light responsiveness
MsLAC124	G-Box	1116	cis-acting regulatory element involved in light responsiveness
MsLAC124	CCAAT-box	634	MYBHv1 binding site
MsLAC124	G-box	683	cis-acting regulatory element involved in light responsiveness
MsLAC125	Myc	471
MsLAC125	Myc	630
MsLAC125	Myc	1994
MsLAC125	AAGAA-motif	981
MsLAC125	AAGAA-motif	1103
MsLAC125	LTR	228	cis-acting element involved in low-temperature responsiveness
MsLAC125	G-box	592	cis-acting regulatory element involved in light responsiveness
MsLAC125	G-box	593	cis-acting regulatory element involved in light responsiveness
MsLAC125	CCAAT-box	1750	MYBHv1 binding site
MsLAC125	MBS	106	MYB binding site involved in drought-inducibility
MsLAC125	STRE	570
MsLAC125	STRE	584
MsLAC125	MYB recognition site	1750
MsLAC125	CTAG-motif	434
MsLAC125	ARE	561	cis-acting regulatory element essential for the anaerobic induction
MsLAC125	ARE	748	cis-acting regulatory element essential for the anaerobic induction
MsLAC125	ARE	970	cis-acting regulatory element essential for the anaerobic induction
MsLAC125	MYC	933
MsLAC125	MYC	1500
MsLAC125	CAT-box	193	cis-acting regulatory element related to meristem expression
MsLAC125	CAT-box	1240	cis-acting regulatory element related to meristem expression
MsLAC125	Box 4	827	part of a conserved DNA module involved in light responsiveness
MsLAC125	Box 4	896	part of a conserved DNA module involved in light responsiveness
MsLAC125	Box 4	1942	part of a conserved DNA module involved in light responsiveness
MsLAC125	Myb	106
MsLAC125	Myb	1317
MsLAC125	CAG-motif	262	part of a light response element
MsLAC125	MYB	248
MsLAC125	MYB	1207
MsLAC125	GATA-motif	1771	part of a light responsive element
MsLAC125	ABRE	593	cis-acting element involved in the abscisic acid responsiveness
MsLAC126	TC-rich repeats	1314	cis-acting element involved in defense and stress responsiveness
MsLAC126	CGTCA-motif	862	cis-acting regulatory element involved in the MeJA-responsiveness
MsLAC126	Box 4	968	part of a conserved DNA module involved in light responsiveness
MsLAC126	Box 4	1322	part of a conserved DNA module involved in light responsiveness
MsLAC126	Myb	141
MsLAC126	Myb	495
MsLAC126	Myb	1282
MsLAC126	Myb	1823
MsLAC126	MYC	622
MsLAC126	MYC	1767
MsLAC126	ARE	413	cis-acting regulatory element essential for the anaerobic induction
MsLAC126	ARE	553	cis-acting regulatory element essential for the anaerobic induction
MsLAC126	ARE	963	cis-acting regulatory element essential for the anaerobic induction
MsLAC126	Myb-binding site	523
MsLAC126	Myb-binding site	919
MsLAC126	Myb-binding site	1945
MsLAC126	as-1	862
MsLAC126	TCA-element	230	cis-acting element involved in salicylic acid responsiveness
MsLAC126	ABRE	877	cis-acting element involved in the abscisic acid responsiveness
MsLAC126	ABRE	1192	cis-acting element involved in the abscisic acid responsiveness
MsLAC126	ABRE	1194	cis-acting element involved in the abscisic acid responsiveness
MsLAC126	ABRE	1195	cis-acting element involved in the abscisic acid responsiveness
MsLAC126	TGACG-motif	862	cis-acting regulatory element involved in the MeJA-responsiveness
MsLAC126	MYB	472
MsLAC126	MYB	489
MsLAC126	MYB	523
MsLAC126	MYB	598
MsLAC126	MYB	740
MsLAC126	MYB	910
MsLAC126	MYB	919
MsLAC126	MYB	1025
MsLAC126	MYB	1524
MsLAC126	MYB	1810
MsLAC126	MYB	1945
MsLAC126	AAGAA-motif	455
MsLAC126	AAGAA-motif	996
MsLAC126	AAGAA-motif	1221
MsLAC126	GT1-motif	599	light responsive element
MsLAC126	GT1-motif	785	light responsive element
MsLAC126	GT1-motif	1959	light responsive element
MsLAC126	ERE	1644
MsLAC126	ERE	1646
MsLAC126	Myc	166
MsLAC126	GARE-motif	1944	gibberellin-responsive element
MsLAC126	STRE	187
MsLAC126	STRE	1034
MsLAC126	STRE	1107
MsLAC126	AT-rich element	935	binding site of AT-rich DNA binding protein (ATBP-1)
MsLAC126	AT-rich element	1938	binding site of AT-rich DNA binding protein (ATBP-1)
MsLAC126	G-Box	1194	cis-acting regulatory element involved in light responsiveness
MsLAC126	MBS	495	MYB binding site involved in drought-inducibility
MsLAC126	MBS	1823	MYB binding site involved in drought-inducibility
MsLAC126	G-box	875	cis-acting regulatory element involved in light responsiveness
MsLAC126	G-box	877	cis-acting regulatory element involved in light responsiveness
MsLAC126	G-box	1194	cis-acting regulatory element involved in light responsiveness
MsLAC127	CCAAT-box	1486	MYBHv1 binding site
MsLAC127	AE-box	805	part of a module for light response
MsLAC127	STRE	232
MsLAC127	MYB recognition site	1486
MsLAC127	W box	1131
MsLAC127	Myc	540
MsLAC127	GT1-motif	307	light responsive element
MsLAC127	GT1-motif	457	light responsive element
MsLAC127	GT1-motif	1943	light responsive element
MsLAC127	MYB	3
MsLAC127	MYB	153
MsLAC127	MYB	306
MsLAC127	MYB	701
MsLAC127	MYB	1299
MsLAC127	GATA-motif	1941	part of a light responsive element
MsLAC127	Myb-binding site	3
MsLAC127	ARE	665	cis-acting regulatory element essential for the anaerobic induction
MsLAC127	ARE	819	cis-acting regulatory element essential for the anaerobic induction
MsLAC127	ARE	1028	cis-acting regulatory element essential for the anaerobic induction
MsLAC127	ARE	1900	cis-acting regulatory element essential for the anaerobic induction
MsLAC127	MYC	354
MsLAC127	MYC	810
MsLAC127	MYC	1636
MsLAC127	Box 4	169	part of a conserved DNA module involved in light responsiveness
MsLAC127	Box 4	868	part of a conserved DNA module involved in light responsiveness
MsLAC127	Box 4	1274	part of a conserved DNA module involved in light responsiveness
MsLAC127	TCT-motif	650	part of a light responsive element
MsLAC127	TCT-motif	1917	part of a light responsive element
MsLAC128	MBS	691	MYB binding site involved in drought-inducibility
MsLAC128	MBS	742	MYB binding site involved in drought-inducibility
MsLAC128	STRE	356
MsLAC128	AE-box	725	part of a module for light response
MsLAC128	AE-box	1351	part of a module for light response
MsLAC128	GT1-motif	638	light responsive element
MsLAC128	Myc	1657
MsLAC128	P-box	1968	gibberellin-responsive element
MsLAC128	MYB	256
MsLAC128	MYB	672
MsLAC128	MYB	1475
MsLAC128	MYB	1530
MsLAC128	F-box	1124
MsLAC128	TCCC-motif	1950	part of a light responsive element
MsLAC128	TC-rich repeats	335	cis-acting element involved in defense and stress responsiveness
MsLAC128	TCT-motif	339	part of a light responsive element
MsLAC128	Myb	49
MsLAC128	Myb	302
MsLAC128	Myb	691
MsLAC128	Myb	742
MsLAC128	Box 4	1458	part of a conserved DNA module involved in light responsiveness
MsLAC128	MYC	403
MsLAC128	MYC	532
MsLAC128	MYC	787
MsLAC128	MYC	943
MsLAC128	MYC	1032
MsLAC128	MYC	1479
MsLAC128	MYC	1773
MsLAC128	ARE	454	cis-acting regulatory element essential for the anaerobic induction
MsLAC128	ARE	567	cis-acting regulatory element essential for the anaerobic induction
MsLAC128	ARE	876	cis-acting regulatory element essential for the anaerobic induction
MsLAC128	ARE	923	cis-acting regulatory element essential for the anaerobic induction
MsLAC128	ARE	1606	cis-acting regulatory element essential for the anaerobic induction
MsLAC128	ARE	1723	cis-acting regulatory element essential for the anaerobic induction
MsLAC129	WUN-motif	959	wound-responsive element
MsLAC129	WUN-motif	1247
MsLAC129	WUN-motif	1553
MsLAC129	as-1	1666
MsLAC129	GCN4_motif	24	cis-regulatory element involved in endosperm expression
MsLAC129	DRE core	429
MsLAC129	MYB	716
MsLAC129	MYB	1595
MsLAC129	GATA-motif	346	part of a light responsive element
MsLAC129	TGACG-motif	1666	cis-acting regulatory element involved in the MeJA-responsiveness
MsLAC129	ABRE	415	cis-acting element involved in the abscisic acid responsiveness
MsLAC129	TCA-element	1364	cis-acting element involved in salicylic acid responsiveness
MsLAC129	MYC	258
MsLAC129	MYC	1034
MsLAC129	MYC	1169
MsLAC129	MYC	1784
MsLAC129	Myb	604
MsLAC129	Box 4	402	part of a conserved DNA module involved in light responsiveness
MsLAC129	Box 4	1811	part of a conserved DNA module involved in light responsiveness
MsLAC129	CGTCA-motif	1666	cis-acting regulatory element involved in the MeJA-responsiveness
MsLAC129	TCA	72
MsLAC129	GA-motif	1203	part of a light responsive element
MsLAC129	AE-box	544	part of a module for light response
MsLAC129	STRE	457
MsLAC129	STRE	1761
MsLAC129	LTR	107	cis-acting element involved in low-temperature responsiveness
MsLAC129	MBS	604	MYB binding site involved in drought-inducibility
MsLAC129	ERE	1006
MsLAC129	AAGAA-motif	570
MsLAC129	ATCT-motif	30	part of a conserved DNA module involved in light responsiveness
MsLAC13	P-box	1171	gibberellin-responsive element
MsLAC13	CARE	1294
MsLAC13	MYB	901
MsLAC13	MYB	1646
MsLAC13	TCA-element	598	cis-acting element involved in salicylic acid responsiveness
MsLAC13	ABRE	26	cis-acting element involved in the abscisic acid responsiveness
MsLAC13	ABRE	115	cis-acting element involved in the abscisic acid responsiveness
MsLAC13	ABRE	141	cis-acting element involved in the abscisic acid responsiveness
MsLAC13	TCA	506
MsLAC13	MYC	703
MsLAC13	MYC	734
MsLAC13	MYC	1244
MsLAC13	MYC	1307
MsLAC13	MYC	1350
MsLAC13	MYC	1650
MsLAC13	MYC	1939
MsLAC13	TC-rich repeats	803	cis-acting element involved in defense and stress responsiveness
MsLAC13	TCT-motif	1471	part of a light responsive element
MsLAC13	Myb	1477
MsLAC13	Box 4	1216	part of a conserved DNA module involved in light responsiveness
MsLAC13	Box 4	1458	part of a conserved DNA module involved in light responsiveness
MsLAC13	CCAAT-box	824	MYBHv1 binding site
MsLAC13	CCAAT-box	1745	MYBHv1 binding site
MsLAC13	G-box	25	cis-acting regulatory element involved in light responsiveness
MsLAC13	G-box	113	cis-acting regulatory element involved in light responsiveness
MsLAC13	G-box	114	cis-acting regulatory element involved in light responsiveness
MsLAC13	G-box	141	cis-acting regulatory element involved in light responsiveness
MsLAC13	G-box	172	cis-acting regulatory element involved in light responsiveness
MsLAC13	G-box	658	cis-acting regulatory element involved in light responsiveness
MsLAC13	MYB recognition site	824
MsLAC13	MYB recognition site	1745
MsLAC13	STRE	612
MsLAC13	STRE	666
MsLAC13	AE-box	645	part of a module for light response
MsLAC13	Myc	493
MsLAC13	Myc	545
MsLAC13	AAGAA-motif	504
MsLAC13	AAGAA-motif	1503
MsLAC13	ATCT-motif	833	part of a conserved DNA module involved in light responsiveness
MsLAC13	GT1-motif	1540	light responsive element
MsLAC13	ERE	1404
MsLAC13	ERE	1462
MsLAC13	ERE	1551
MsLAC130	MYB	553
MsLAC130	TGACG-motif	1475	cis-acting regulatory element involved in the MeJA-responsiveness
MsLAC130	GATA-motif	1404	part of a light responsive element
MsLAC130	ABRE	1477	cis-acting element involved in the abscisic acid responsiveness
MsLAC130	TCA-element	181	cis-acting element involved in salicylic acid responsiveness
MsLAC130	TCA-element	1177	cis-acting element involved in salicylic acid responsiveness
MsLAC130	as-1	1475
MsLAC130	GCN4_motif	1380	cis-regulatory element involved in endosperm expression
MsLAC130	MBSI	53	MYB binding site involved in flavonoid biosynthetic genes regulation
MsLAC130	TCA	1688
MsLAC130	TCA	1694
MsLAC130	ARE	1174	cis-acting regulatory element essential for the anaerobic induction
MsLAC130	MYC	914
MsLAC130	MYC	1599
MsLAC130	MYC	1873
MsLAC130	CAT-box	992	cis-acting regulatory element related to meristem expression
MsLAC130	Box 4	1037	part of a conserved DNA module involved in light responsiveness
MsLAC130	MRE	1052	MYB binding site involved in light responsiveness
MsLAC130	MRE	1660	MYB binding site involved in light responsiveness
MsLAC130	TGA-element	153	auxin-responsive element
MsLAC130	Myb	1463
MsLAC130	CGTCA-motif	1475	cis-acting regulatory element involved in the MeJA-responsiveness
MsLAC130	TCT-motif	1792	part of a light responsive element
MsLAC130	TC-rich repeats	1305	cis-acting element involved in defense and stress responsiveness
MsLAC130	LTR	220	cis-acting element involved in low-temperature responsiveness
MsLAC130	G-box	1476	cis-acting regulatory element involved in light responsiveness
MsLAC130	AT-rich element	193	binding site of AT-rich DNA binding protein (ATBP-1)
MsLAC130	AE-box	1067	part of a module for light response
MsLAC130	W box	774
MsLAC130	W box	810
MsLAC130	ERE	123
MsLAC130	GT1-motif	425	light responsive element
MsLAC130	GT1-motif	426	light responsive element
MsLAC130	GT1-motif	554	light responsive element
MsLAC131	STRE	153
MsLAC131	STRE	864
MsLAC131	W box	724
MsLAC131	W box	1423
MsLAC131	W box	1432
MsLAC131	DRE1	22
MsLAC131	ATC-motif	963	part of a conserved DNA module involved in light responsiveness
MsLAC131	ATC-motif	1002	part of a conserved DNA module involved in light responsiveness
MsLAC131	ERE	802
MsLAC131	ERE	855
MsLAC131	ERE	1069
MsLAC131	ERE	1108
MsLAC131	ERE	1717
MsLAC131	ERE	1854
MsLAC131	GT1-motif	164	light responsive element
MsLAC131	AAGAA-motif	82
MsLAC131	AAGAA-motif	159
MsLAC131	AAGAA-motif	457
MsLAC131	AAGAA-motif	494
MsLAC131	MYB	927
MsLAC131	MYB	1225
MsLAC131	MYB	1301
MsLAC131	MYB	1330
MsLAC131	ACE	274	cis-acting element involved in light responsiveness
MsLAC131	MBSI	275	MYB binding site involved in flavonoid biosynthetic genes regulation
MsLAC131	ARE	365	cis-acting regulatory element essential for the anaerobic induction
MsLAC131	MYC	1513
MsLAC131	MYC	1986
MsLAC131	CAT-box	1577	cis-acting regulatory element related to meristem expression
MsLAC131	CAT-box	1758	cis-acting regulatory element related to meristem expression
MsLAC131	Box 4	555	part of a conserved DNA module involved in light responsiveness
MsLAC131	Box 4	907	part of a conserved DNA module involved in light responsiveness
MsLAC131	Box 4	1570	part of a conserved DNA module involved in light responsiveness
MsLAC131	TCT-motif	1007	part of a light responsive element
MsLAC131	TCT-motif	1661	part of a light responsive element
MsLAC131	TC-rich repeats	1698	cis-acting element involved in defense and stress responsiveness
MsLAC132	CCGTCC-box	1277
MsLAC132	MYC	216
MsLAC132	MYC	723
MsLAC132	MYC	992
MsLAC132	MYC	1143
MsLAC132	ARE	233	cis-acting regulatory element essential for the anaerobic induction
MsLAC132	ARE	347	cis-acting regulatory element essential for the anaerobic induction
MsLAC132	ARE	411	cis-acting regulatory element essential for the anaerobic induction
MsLAC132	ARE	537	cis-acting regulatory element essential for the anaerobic induction
MsLAC132	ARE	1584	cis-acting regulatory element essential for the anaerobic induction
MsLAC132	ARE	1810	cis-acting regulatory element essential for the anaerobic induction
MsLAC132	Box 4	945	part of a conserved DNA module involved in light responsiveness
MsLAC132	Box 4	1439	part of a conserved DNA module involved in light responsiveness
MsLAC132	CGTCA-motif	1517	cis-acting regulatory element involved in the MeJA-responsiveness
MsLAC132	CGTCA-motif	1800	cis-acting regulatory element involved in the MeJA-responsiveness
MsLAC132	TCT-motif	1560	part of a light responsive element
MsLAC132	TC-rich repeats	129	cis-acting element involved in defense and stress responsiveness
MsLAC132	CCGTCC motif	1277
MsLAC132	WUN-motif	1668
MsLAC132	as-1	1517
MsLAC132	as-1	1800
MsLAC132	Myb-binding site	1247
MsLAC132	MYB	442
MsLAC132	MYB	647
MsLAC132	MYB	1247
MsLAC132	MYB	1844
MsLAC132	P-box	790	gibberellin-responsive element
MsLAC132	TGACG-motif	1517	cis-acting regulatory element involved in the MeJA-responsiveness
MsLAC132	TGACG-motif	1800	cis-acting regulatory element involved in the MeJA-responsiveness
MsLAC132	ABRE	1078	cis-acting element involved in the abscisic acid responsiveness
MsLAC132	ABRE	1080	cis-acting element involved in the abscisic acid responsiveness
MsLAC132	ABRE	1081	cis-acting element involved in the abscisic acid responsiveness
MsLAC132	ABRE	1120	cis-acting element involved in the abscisic acid responsiveness
MsLAC132	ABRE	1122	cis-acting element involved in the abscisic acid responsiveness
MsLAC132	ABRE	1798	cis-acting element involved in the abscisic acid responsiveness
MsLAC132	ERE	404
MsLAC132	ERE	1706
MsLAC132	GT1-motif	1845	light responsive element
MsLAC132	AAGAA-motif	801
MsLAC132	AAGAA-motif	928
MsLAC132	W box	1494
MsLAC132	G-box	1075	cis-acting regulatory element involved in light responsiveness
MsLAC132	G-box	1077	cis-acting regulatory element involved in light responsiveness
MsLAC132	G-box	1079	cis-acting regulatory element involved in light responsiveness
MsLAC132	G-box	1080	cis-acting regulatory element involved in light responsiveness
MsLAC132	G-box	1110	cis-acting regulatory element involved in light responsiveness
MsLAC132	G-box	1798	cis-acting regulatory element involved in light responsiveness
MsLAC132	G-Box	1080	cis-acting regulatory element involved in light responsiveness
MsLAC132	G-Box	1122	cis-acting regulatory element involved in light responsiveness
MsLAC133	P-box	1349	gibberellin-responsive element
MsLAC133	MYB	782
MsLAC133	MYB	843
MsLAC133	MYB	1038
MsLAC133	MYB	1825
MsLAC133	ABRE	1170	cis-acting element involved in the abscisic acid responsiveness
MsLAC133	WUN-motif	164
MsLAC133	WUN-motif	165
MsLAC133	WUN-motif	190
MsLAC133	WUN-motif	191
MsLAC133	MYC	547
MsLAC133	MYC	831
MsLAC133	MYC	931
MsLAC133	MYC	1055
MsLAC133	MYC	1309
MsLAC133	MYC	1390
MsLAC133	ARE	1796	cis-acting regulatory element essential for the anaerobic induction
MsLAC133	ARE	1912	cis-acting regulatory element essential for the anaerobic induction
MsLAC133	ARE	1918	cis-acting regulatory element essential for the anaerobic induction
MsLAC133	TCT-motif	1012	part of a light responsive element
MsLAC133	TCT-motif	1110	part of a light responsive element
MsLAC133	TCT-motif	1878	part of a light responsive element
MsLAC133	TC-rich repeats	1874	cis-acting element involved in defense and stress responsiveness
MsLAC133	Myb	59
MsLAC133	Myb	1409
MsLAC133	Box 4	159	part of a conserved DNA module involved in light responsiveness
MsLAC133	Box 4	478	part of a conserved DNA module involved in light responsiveness
MsLAC133	Box 4	1145	part of a conserved DNA module involved in light responsiveness
MsLAC133	Box 4	1232	part of a conserved DNA module involved in light responsiveness
MsLAC133	Box 4	1433	part of a conserved DNA module involved in light responsiveness
MsLAC133	Box 4	1788	part of a conserved DNA module involved in light responsiveness
MsLAC133	Box 4	1949	part of a conserved DNA module involved in light responsiveness
MsLAC133	CCAAT-box	76	MYBHv1 binding site
MsLAC133	MBS	59	MYB binding site involved in drought-inducibility
MsLAC133	MBS	1409	MYB binding site involved in drought-inducibility
MsLAC133	W box	382
MsLAC133	W box	435
MsLAC133	W box	462
MsLAC133	W box	1058
MsLAC133	MYB recognition site	76
MsLAC133	STRE	1298
MsLAC133	STRE	1426
MsLAC133	ATCT-motif	936	part of a conserved DNA module involved in light responsiveness
MsLAC133	AAGAA-motif	737
MsLAC133	ERE	117
MsLAC133	GT1-motif	26	light responsive element
MsLAC133	GT1-motif	27	light responsive element
MsLAC133	GT1-motif	842	light responsive element
MsLAC134	Box 4	65	part of a conserved DNA module involved in light responsiveness
MsLAC134	Box 4	1367	part of a conserved DNA module involved in light responsiveness
MsLAC134	Box 4	1801	part of a conserved DNA module involved in light responsiveness
MsLAC134	Myb	145
MsLAC134	Myb	528
MsLAC134	Myb	610
MsLAC134	Myb	628
MsLAC134	Myb	671
MsLAC134	Myb	1113
MsLAC134	TC-rich repeats	615	cis-acting element involved in defense and stress responsiveness
MsLAC134	TC-rich repeats	1183	cis-acting element involved in defense and stress responsiveness
MsLAC134	TCT-motif	727	part of a light responsive element
MsLAC134	TCT-motif	883	part of a light responsive element
MsLAC134	ARE	801	cis-acting regulatory element essential for the anaerobic induction
MsLAC134	ARE	1898	cis-acting regulatory element essential for the anaerobic induction
MsLAC134	MYC	492
MsLAC134	MYC	1380
MsLAC134	MYC	1703
MsLAC134	MYC	1961
MsLAC134	CAT-box	1567	cis-acting regulatory element related to meristem expression
MsLAC134	AuxRR-core	431	cis-acting regulatory element involved in auxin responsiveness
MsLAC134	Myb-binding site	148
MsLAC134	Myb-binding site	201
MsLAC134	Myb-binding site	235
MsLAC134	MYB	148
MsLAC134	MYB	201
MsLAC134	MYB	235
MsLAC134	MYB	659
MsLAC134	MYB	1202
MsLAC134	MYB	1404
MsLAC134	MYB	1554
MsLAC134	MYB	1623
MsLAC134	MYB	1695
MsLAC134	MYB	1699
MsLAC134	MYB	1965
MsLAC134	GT1-motif	1446	light responsive element
MsLAC134	GT1-motif	1447	light responsive element
MsLAC134	GT1-motif	1696	light responsive element
MsLAC134	GT1-motif	1698	light responsive element
MsLAC134	ERE	1782
MsLAC134	ATCT-motif	401	part of a conserved DNA module involved in light responsiveness
MsLAC134	AAGAA-motif	563
MsLAC134	AAGAA-motif	1527
MsLAC134	AAGAA-motif	1528
MsLAC134	AAGAA-motif	1731
MsLAC134	GARE-motif	234	gibberellin-responsive element
MsLAC134	STRE	1013
MsLAC134	AE-box	560	part of a module for light response
MsLAC134	W box	1637
MsLAC134	MYB recognition site	26
MsLAC134	MYB recognition site	41
MsLAC134	TATC-box	205	cis-acting element involved in gibberellin-responsiveness
MsLAC134	MBS	145	MYB binding site involved in drought-inducibility
MsLAC134	CCAAT-box	26	MYBHv1 binding site
MsLAC134	CCAAT-box	41	MYBHv1 binding site
MsLAC135	AAGAA-motif	981
MsLAC135	ATCT-motif	1065	part of a conserved DNA module involved in light responsiveness
MsLAC135	GT1-motif	635	light responsive element
MsLAC135	MYB recognition site	674
MsLAC135	W box	108
MsLAC135	G-Box	1477	cis-acting regulatory element involved in light responsiveness
MsLAC135	CCAAT-box	674	MYBHv1 binding site
MsLAC135	MBS	265	MYB binding site involved in drought-inducibility
MsLAC135	MBS	630	MYB binding site involved in drought-inducibility
MsLAC135	MBS	818	MYB binding site involved in drought-inducibility
MsLAC135	G-box	223	cis-acting regulatory element involved in light responsiveness
MsLAC135	G-box	1294	cis-acting regulatory element involved in light responsiveness
MsLAC135	G-box	1477	cis-acting regulatory element involved in light responsiveness
MsLAC135	TC-rich repeats	1353	cis-acting element involved in defense and stress responsiveness
MsLAC135	TCT-motif	93	part of a light responsive element
MsLAC135	TCT-motif	393	part of a light responsive element
MsLAC135	TCT-motif	1610	part of a light responsive element
MsLAC135	Box 4	413	part of a conserved DNA module involved in light responsiveness
MsLAC135	Box 4	1562	part of a conserved DNA module involved in light responsiveness
MsLAC135	Myb	127
MsLAC135	Myb	265
MsLAC135	Myb	630
MsLAC135	Myb	818
MsLAC135	Myb	1290
MsLAC135	Myb	1366
MsLAC135	Myb	1409
MsLAC135	CAT-box	385	cis-acting regulatory element related to meristem expression
MsLAC135	MYC	55
MsLAC135	MYC	138
MsLAC135	MYC	325
MsLAC135	MYC	507
MsLAC135	MYC	685
MsLAC135	MYC	1257
MsLAC135	MYC	1592
MsLAC135	ARE	1451	cis-acting regulatory element essential for the anaerobic induction
MsLAC135	ARE	1528	cis-acting regulatory element essential for the anaerobic induction
MsLAC135	CTAG-motif	1041
MsLAC135	Myb-binding site	399
MsLAC135	Myb-binding site	815
MsLAC135	MBSI	1176	MYB binding site involved in flavonoid biosynthetic genes regulation
MsLAC135	WUN-motif	697
MsLAC135	ABRE	1295	cis-acting element involved in the abscisic acid responsiveness
MsLAC135	ABRE	1477	cis-acting element involved in the abscisic acid responsiveness
MsLAC135	ABRE	1478	cis-acting element involved in the abscisic acid responsiveness
MsLAC135	GATA-motif	709	part of a light responsive element
MsLAC135	P-box	238	gibberellin-responsive element
MsLAC135	MYB	41
MsLAC135	MYB	187
MsLAC135	MYB	399
MsLAC135	MYB	517
MsLAC135	MYB	634
MsLAC135	MYB	815
MsLAC135	MYB	1397
MsLAC135	MYB	1481
MsLAC135	MYB	1761
MsLAC135	MYB	1894
MsLAC136	TCA	83
MsLAC136	TCT-motif	1559	part of a light responsive element
MsLAC136	TCT-motif	1977	part of a light responsive element
MsLAC136	MRE	1168	MYB binding site involved in light responsiveness
MsLAC136	Box 4	259	part of a conserved DNA module involved in light responsiveness
MsLAC136	Box 4	656	part of a conserved DNA module involved in light responsiveness
MsLAC136	Box 4	1219	part of a conserved DNA module involved in light responsiveness
MsLAC136	Myb	1600
MsLAC136	CGTCA-motif	469	cis-acting regulatory element involved in the MeJA-responsiveness
MsLAC136	CAT-box	176	cis-acting regulatory element related to meristem expression
MsLAC136	MYC	1246
MsLAC136	MYC	1445
MsLAC136	MYC	1652
MsLAC136	MYC	1696
MsLAC136	ARE	319	cis-acting regulatory element essential for the anaerobic induction
MsLAC136	ARE	523	cis-acting regulatory element essential for the anaerobic induction
MsLAC136	ARE	687	cis-acting regulatory element essential for the anaerobic induction
MsLAC136	ARE	1113	cis-acting regulatory element essential for the anaerobic induction
MsLAC136	ARE	1315	cis-acting regulatory element essential for the anaerobic induction
MsLAC136	ABRE	1386	cis-acting element involved in the abscisic acid responsiveness
MsLAC136	ABRE	1387	cis-acting element involved in the abscisic acid responsiveness
MsLAC136	TGACG-motif	469	cis-acting regulatory element involved in the MeJA-responsiveness
MsLAC136	CARE	1920
MsLAC136	MYB	254
MsLAC136	MYB	389
MsLAC136	MYB	704
MsLAC136	MYB	1301
MsLAC136	MYB	1582
MsLAC136	MYB	1865
MsLAC136	AuxRR-core	1196	cis-acting regulatory element involved in auxin responsiveness
MsLAC136	as-1	469
MsLAC136	WUN-motif	855
MsLAC136	AAGAA-motif	118
MsLAC136	ATCT-motif	140	part of a conserved DNA module involved in light responsiveness
MsLAC136	ERE	926
MsLAC136	GT1-motif	703	light responsive element
MsLAC136	Myc	298
MsLAC136	Myc	1557
MsLAC136	TATC-box	996	cis-acting element involved in gibberellin-responsiveness
MsLAC136	AP-1	443
MsLAC136	G-Box	1386	cis-acting regulatory element involved in light responsiveness
MsLAC136	G-box	1386	cis-acting regulatory element involved in light responsiveness
MsLAC136	AE-box	1249	part of a module for light response
MsLAC136	STRE	59
MsLAC136	STRE	209
MsLAC137	GARE-motif	1525	gibberellin-responsive element
MsLAC137	GARE-motif	1582	gibberellin-responsive element
MsLAC137	Myc	1173
MsLAC137	GT1-motif	939	light responsive element
MsLAC137	GT1-motif	1195	light responsive element
MsLAC137	GT1-motif	1196	light responsive element
MsLAC137	AAGAA-motif	513
MsLAC137	LTR	1685	cis-acting element involved in low-temperature responsiveness
MsLAC137	G-box	658	cis-acting regulatory element involved in light responsiveness
MsLAC137	G-box	659	cis-acting regulatory element involved in light responsiveness
MsLAC137	MBS	836	MYB binding site involved in drought-inducibility
MsLAC137	MBS	1572	MYB binding site involved in drought-inducibility
MsLAC137	G-Box	659	cis-acting regulatory element involved in light responsiveness
MsLAC137	G-Box	983	cis-acting regulatory element involved in light responsiveness
MsLAC137	STRE	828
MsLAC137	STRE	1325
MsLAC137	STRE	1946
MsLAC137	CTAG-motif	549
MsLAC137	ARE	1210	cis-acting regulatory element essential for the anaerobic induction
MsLAC137	GC-motif	1556	enhancer-like element involved in anoxic specific inducibility
MsLAC137	MYC	196
MsLAC137	MYC	1166
MsLAC137	MYC	1802
MsLAC137	MYC	1830
MsLAC137	Box 4	770	part of a conserved DNA module involved in light responsiveness
MsLAC137	Myb	836
MsLAC137	Myb	1572
MsLAC137	CGTCA-motif	1560	cis-acting regulatory element involved in the MeJA-responsiveness
MsLAC137	CGTCA-motif	1909	cis-acting regulatory element involved in the MeJA-responsiveness
MsLAC137	TCT-motif	1041	part of a light responsive element
MsLAC137	TCT-motif	1384	part of a light responsive element
MsLAC137	TC-rich repeats	1037	cis-acting element involved in defense and stress responsiveness
MsLAC137	MYB	506
MsLAC137	MYB	938
MsLAC137	MYB	1136
MsLAC137	MYB	1314
MsLAC137	MYB	1526
MsLAC137	MYB	1582
MsLAC137	MYB	1798
MsLAC137	P-box	446	gibberellin-responsive element
MsLAC137	TGACG-motif	1560	cis-acting regulatory element involved in the MeJA-responsiveness
MsLAC137	TGACG-motif	1909	cis-acting regulatory element involved in the MeJA-responsiveness
MsLAC137	GATA-motif	334	part of a light responsive element
MsLAC137	ABRE	659	cis-acting element involved in the abscisic acid responsiveness
MsLAC137	ABRE	660	cis-acting element involved in the abscisic acid responsiveness
MsLAC137	ABRE	981	cis-acting element involved in the abscisic acid responsiveness
MsLAC137	ABRE	983	cis-acting element involved in the abscisic acid responsiveness
MsLAC137	TCA-element	258	cis-acting element involved in salicylic acid responsiveness
MsLAC137	as-1	1560
MsLAC137	as-1	1909
MsLAC137	Myb-binding site	506
MsLAC137	Myb-binding site	1526
MsLAC137	Myb-binding site	1582
MsLAC138	TCA	420
MsLAC138	Box 4	818	part of a conserved DNA module involved in light responsiveness
MsLAC138	Myb	119
MsLAC138	Myb	1457
MsLAC138	Myb	1614
MsLAC138	TCT-motif	1573	part of a light responsive element
MsLAC138	MYC	314
MsLAC138	MYC	1666
MsLAC138	MYC	1710
MsLAC138	ARE	685	cis-acting regulatory element essential for the anaerobic induction
MsLAC138	ARE	849	cis-acting regulatory element essential for the anaerobic induction
MsLAC138	ARE	1327	cis-acting regulatory element essential for the anaerobic induction
MsLAC138	ABRE	562	cis-acting element involved in the abscisic acid responsiveness
MsLAC138	ABRE	1398	cis-acting element involved in the abscisic acid responsiveness
MsLAC138	ABRE	1399	cis-acting element involved in the abscisic acid responsiveness
MsLAC138	MYB	548
MsLAC138	MYB	866
MsLAC138	MYB	1313
MsLAC138	MYB	1596
MsLAC138	MYB	1879
MsLAC138	MBSI	261	MYB binding site involved in flavonoid biosynthetic genes regulation
MsLAC138	WUN-motif	1017
MsLAC138	WUN-motif	1086
MsLAC138	ERE	1077
MsLAC138	GT1-motif	865	light responsive element
MsLAC138	AAGAA-motif	455
MsLAC138	Myc	1571
MsLAC138	TATC-box	1156	cis-acting element involved in gibberellin-responsiveness
MsLAC138	AT-rich element	480	binding site of AT-rich DNA binding protein (ATBP-1)
MsLAC138	G-box	1398	cis-acting regulatory element involved in light responsiveness
MsLAC138	CCAAT-box	1104	MYBHv1 binding site
MsLAC138	CCAAT-box	1264	MYBHv1 binding site
MsLAC138	AP-1	601
MsLAC138	G-Box	562	cis-acting regulatory element involved in light responsiveness
MsLAC138	G-Box	1398	cis-acting regulatory element involved in light responsiveness
MsLAC138	MBS	1457	MYB binding site involved in drought-inducibility
MsLAC138	STRE	396
MsLAC138	W box	627
MsLAC138	MYB recognition site	1104
MsLAC138	MYB recognition site	1264
MsLAC139	CTAG-motif	775
MsLAC139	TC-rich repeats	998	cis-acting element involved in defense and stress responsiveness
MsLAC139	TC-rich repeats	1562	cis-acting element involved in defense and stress responsiveness
MsLAC139	TCT-motif	1110	part of a light responsive element
MsLAC139	TCT-motif	1262	part of a light responsive element
MsLAC139	CGTCA-motif	364	cis-acting regulatory element involved in the MeJA-responsiveness
MsLAC139	Myb	46
MsLAC139	Myb	555
MsLAC139	Myb	911
MsLAC139	Myb	993
MsLAC139	Myb	1011
MsLAC139	Myb	1054
MsLAC139	Myb	1492
MsLAC139	Box 4	180	part of a conserved DNA module involved in light responsiveness
MsLAC139	Box 4	475	part of a conserved DNA module involved in light responsiveness
MsLAC139	Box 4	1218	part of a conserved DNA module involved in light responsiveness
MsLAC139	Box 4	1746	part of a conserved DNA module involved in light responsiveness
MsLAC139	CAT-box	166	cis-acting regulatory element related to meristem expression
MsLAC139	CAT-box	1946	cis-acting regulatory element related to meristem expression
MsLAC139	ARE	989	cis-acting regulatory element essential for the anaerobic induction
MsLAC139	MYC	106
MsLAC139	MYC	145
MsLAC139	MYC	275
MsLAC139	MYC	878
MsLAC139	MYC	1244
MsLAC139	MYC	1759
MsLAC139	ABRE	367	cis-acting element involved in the abscisic acid responsiveness
MsLAC139	TGACG-motif	364	cis-acting regulatory element involved in the MeJA-responsiveness
MsLAC139	P-box	19	gibberellin-responsive element
MsLAC139	CARE	1045
MsLAC139	MYB	55
MsLAC139	MYB	405
MsLAC139	MYB	1581
MsLAC139	MYB	1933
MsLAC139	AuxRR-core	819	cis-acting regulatory element involved in auxin responsiveness
MsLAC139	as-1	364
MsLAC139	ATCT-motif	789	part of a conserved DNA module involved in light responsiveness
MsLAC139	AAGAA-motif	946
MsLAC139	AAGAA-motif	1906
MsLAC139	AAGAA-motif	1907
MsLAC139	GT1-motif	1825	light responsive element
MsLAC139	GT1-motif	1826	light responsive element
MsLAC139	ERE	431
MsLAC139	TATC-box	614	cis-acting element involved in gibberellin-responsiveness
MsLAC139	CCAAT-box	451	MYBHv1 binding site
MsLAC139	MBS	46	MYB binding site involved in drought-inducibility
MsLAC139	MBS	555	MYB binding site involved in drought-inducibility
MsLAC139	MBS	993	MYB binding site involved in drought-inducibility
MsLAC139	G-box	4	cis-acting regulatory element involved in light responsiveness
MsLAC139	G-box	367	cis-acting regulatory element involved in light responsiveness
MsLAC139	MYB recognition site	451
MsLAC139	W box	605
MsLAC139	STRE	1392
MsLAC139	AE-box	943	part of a module for light response
MsLAC14	TCT-motif	1516	part of a light responsive element
MsLAC14	Box 4	1322	part of a conserved DNA module involved in light responsiveness
MsLAC14	Box 4	1503	part of a conserved DNA module involved in light responsiveness
MsLAC14	Myb	1522
MsLAC14	ARE	1177	cis-acting regulatory element essential for the anaerobic induction
MsLAC14	ARE	1305	cis-acting regulatory element essential for the anaerobic induction
MsLAC14	MYC	242
MsLAC14	MYC	1696
MsLAC14	MYC	1984
MsLAC14	TCA-element	746	cis-acting element involved in salicylic acid responsiveness
MsLAC14	TCA-element	1145	cis-acting element involved in salicylic acid responsiveness
MsLAC14	TCA-element	1268	cis-acting element involved in salicylic acid responsiveness
MsLAC14	MYB	1208
MsLAC14	MYB	1692
MsLAC14	MYB	1762
MsLAC14	MBSI	1131	MYB binding site involved in flavonoid biosynthetic genes regulation
MsLAC14	WUN-motif	202
MsLAC14	ERE	1448
MsLAC14	ERE	1507
MsLAC14	ERE	1601
MsLAC14	GT1-motif	1129	light responsive element
MsLAC14	GT1-motif	1130	light responsive element
MsLAC14	CCAAT-box	298	MYBHv1 binding site
MsLAC14	CCAAT-box	1791	MYBHv1 binding site
MsLAC14	MYB recognition site	298
MsLAC14	MYB recognition site	1791
MsLAC14	STRE	665
MsLAC140	G-Box	314	cis-acting regulatory element involved in light responsiveness
MsLAC140	W box	111
MsLAC140	W box	962
MsLAC140	STRE	1198
MsLAC140	STRE	1296
MsLAC140	STRE	1424
MsLAC140	AE-box	536	part of a module for light response
MsLAC140	AAGAA-motif	641
MsLAC140	ATCT-motif	840	part of a conserved DNA module involved in light responsiveness
MsLAC140	GT1-motif	746	light responsive element
MsLAC140	ABRE	314	cis-acting element involved in the abscisic acid responsiveness
MsLAC140	ABRE	1073	cis-acting element involved in the abscisic acid responsiveness
MsLAC140	ABRE	1157	cis-acting element involved in the abscisic acid responsiveness
MsLAC140	ABRE	1255	cis-acting element involved in the abscisic acid responsiveness
MsLAC140	TGACG-motif	221	cis-acting regulatory element involved in the MeJA-responsiveness
MsLAC140	GATA-motif	173	part of a light responsive element
MsLAC140	MYB	686
MsLAC140	MYB	747
MsLAC140	MYB	942
MsLAC140	MYB	1825
MsLAC140	as-1	221
MsLAC140	TC-rich repeats	1874	cis-acting element involved in defense and stress responsiveness
MsLAC140	TCT-motif	270	part of a light responsive element
MsLAC140	TCT-motif	916	part of a light responsive element
MsLAC140	TCT-motif	1014	part of a light responsive element
MsLAC140	TCT-motif	1878	part of a light responsive element
MsLAC140	CGTCA-motif	221	cis-acting regulatory element involved in the MeJA-responsiveness
MsLAC140	Box 4	283	part of a conserved DNA module involved in light responsiveness
MsLAC140	Box 4	1048	part of a conserved DNA module involved in light responsiveness
MsLAC140	Box 4	1132	part of a conserved DNA module involved in light responsiveness
MsLAC140	Box 4	1230	part of a conserved DNA module involved in light responsiveness
MsLAC140	Box 4	1431	part of a conserved DNA module involved in light responsiveness
MsLAC140	Box 4	1788	part of a conserved DNA module involved in light responsiveness
MsLAC140	Box 4	1949	part of a conserved DNA module involved in light responsiveness
MsLAC140	MYC	835
MsLAC140	MYC	959
MsLAC140	MYC	1209
MsLAC140	MYC	1307
MsLAC140	MYC	1388
MsLAC140	MYC	1407
MsLAC140	ARE	1912	cis-acting regulatory element essential for the anaerobic induction
MsLAC140	ARE	1918	cis-acting regulatory element essential for the anaerobic induction
MsLAC141	Myc	1521
MsLAC141	AAGAA-motif	1825
MsLAC141	ERE	640
MsLAC141	ERE	1535
MsLAC141	MYB recognition site	1354
MsLAC141	W box	92
MsLAC141	W box	1811
MsLAC141	AE-box	891	part of a module for light response
MsLAC141	AE-box	1009	part of a module for light response
MsLAC141	CCAAT-box	1354	MYBHv1 binding site
MsLAC141	MBS	725	MYB binding site involved in drought-inducibility
MsLAC141	MBS	938	MYB binding site involved in drought-inducibility
MsLAC141	MBS	1156	MYB binding site involved in drought-inducibility
MsLAC141	ARE	79	cis-acting regulatory element essential for the anaerobic induction
MsLAC141	ARE	1846	cis-acting regulatory element essential for the anaerobic induction
MsLAC141	MYC	17
MsLAC141	MYC	23
MsLAC141	MYC	43
MsLAC141	MYC	840
MsLAC141	MYC	1802
MsLAC141	Myb	725
MsLAC141	Myb	938
MsLAC141	Myb	1156
MsLAC141	Box 4	791	part of a conserved DNA module involved in light responsiveness
MsLAC141	CGTCA-motif	507	cis-acting regulatory element involved in the MeJA-responsiveness
MsLAC141	CTAG-motif	349
MsLAC141	as-1	507
MsLAC141	WUN-motif	658	wound-responsive element
MsLAC141	WUN-motif	1229
MsLAC141	WUN-motif	1333
MsLAC141	WUN-motif	1531
MsLAC141	MYB	239
MsLAC141	MYB	1692
MsLAC141	TCA-element	97	cis-acting element involved in salicylic acid responsiveness
MsLAC141	TGACG-motif	507	cis-acting regulatory element involved in the MeJA-responsiveness
MsLAC141	GATA-motif	882	part of a light responsive element
MsLAC142	TCA	1324
MsLAC142	TCA	1436
MsLAC142	CCGTCC motif	389
MsLAC142	CCGTCC-box	389
MsLAC142	ARE	171	cis-acting regulatory element essential for the anaerobic induction
MsLAC142	ARE	192	cis-acting regulatory element essential for the anaerobic induction
MsLAC142	MYC	185
MsLAC142	MYC	888
MsLAC142	MYC	1719
MsLAC142	TCT-motif	1824	part of a light responsive element
MsLAC142	TC-rich repeats	609	cis-acting element involved in defense and stress responsiveness
MsLAC142	Myb	1518
MsLAC142	Box 4	1794	part of a conserved DNA module involved in light responsiveness
MsLAC142	CGTCA-motif	782	cis-acting regulatory element involved in the MeJA-responsiveness
MsLAC142	CGTCA-motif	936	cis-acting regulatory element involved in the MeJA-responsiveness
MsLAC142	MYB	204
MsLAC142	MYB	221
MsLAC142	MYB	731
MsLAC142	MYB	1587
MsLAC142	MYB	1591
MsLAC142	ABRE	1595	cis-acting element involved in the abscisic acid responsiveness
MsLAC142	TGACG-motif	782	cis-acting regulatory element involved in the MeJA-responsiveness
MsLAC142	TGACG-motif	936	cis-acting regulatory element involved in the MeJA-responsiveness
MsLAC142	GATA-motif	1086	part of a light responsive element
MsLAC142	GATA-motif	1118	part of a light responsive element
MsLAC142	GATA-motif	1153	part of a light responsive element
MsLAC142	GATA-motif	1188	part of a light responsive element
MsLAC142	WUN-motif	1414
MsLAC142	as-1	782
MsLAC142	as-1	936
MsLAC142	GCN4_motif	925	cis-regulatory element involved in endosperm expression
MsLAC142	AuxRR-core	1843	cis-acting regulatory element involved in auxin responsiveness
MsLAC142	AAGAA-motif	179
MsLAC142	GT1-motif	205	light responsive element
MsLAC142	GT1-motif	1588	light responsive element
MsLAC142	GT1-motif	1590	light responsive element
MsLAC142	G-Box	1595	cis-acting regulatory element involved in light responsiveness
MsLAC142	CCAAT-box	1252	MYBHv1 binding site
MsLAC142	LTR	276	cis-acting element involved in low-temperature responsiveness
MsLAC142	MYB recognition site	1252
MsLAC142	STRE	386
MsLAC143	W box	1424
MsLAC143	W box	1433
MsLAC143	MYB	1221
MsLAC143	MYB	1297
MsLAC143	MYB	1326
MsLAC143	MYC	1514
MsLAC143	MYC	1986
MsLAC143	ARE	462	cis-acting regulatory element essential for the anaerobic induction
MsLAC143	Myc	892
MsLAC143	CAT-box	1578	cis-acting regulatory element related to meristem expression
MsLAC143	CAT-box	1759	cis-acting regulatory element related to meristem expression
MsLAC143	ATC-motif	993	part of a conserved DNA module involved in light responsiveness
MsLAC143	Box 4	473	part of a conserved DNA module involved in light responsiveness
MsLAC143	Box 4	879	part of a conserved DNA module involved in light responsiveness
MsLAC143	Box 4	1413	part of a conserved DNA module involved in light responsiveness
MsLAC143	Box 4	1571	part of a conserved DNA module involved in light responsiveness
MsLAC143	ERE	41
MsLAC143	ERE	283
MsLAC143	ERE	467
MsLAC143	ERE	1060
MsLAC143	ERE	1099
MsLAC143	ERE	1718
MsLAC143	ERE	1855
MsLAC143	AAGAA-motif	800
MsLAC143	TC-rich repeats	1699	cis-acting element involved in defense and stress responsiveness
MsLAC143	TCT-motif	998	part of a light responsive element
MsLAC143	TCT-motif	1662	part of a light responsive element
MsLAC144	DRE1	1287
MsLAC144	AAGAA-motif	1241
MsLAC144	W box	1062
MsLAC144	STRE	878
MsLAC144	STRE	1610
MsLAC144	STRE	1638
MsLAC144	AE-box	495	part of a module for light response
MsLAC144	G-Box	1618	cis-acting regulatory element involved in light responsiveness
MsLAC144	G-box	307	cis-acting regulatory element involved in light responsiveness
MsLAC144	G-box	1618	cis-acting regulatory element involved in light responsiveness
MsLAC144	CAT-box	1053	cis-acting regulatory element related to meristem expression
MsLAC144	ARE	344	cis-acting regulatory element essential for the anaerobic induction
MsLAC144	ARE	618	cis-acting regulatory element essential for the anaerobic induction
MsLAC144	ARE	890	cis-acting regulatory element essential for the anaerobic induction
MsLAC144	ARE	1179	cis-acting regulatory element essential for the anaerobic induction
MsLAC144	MYC	32
MsLAC144	MYC	156
MsLAC144	MYC	251
MsLAC144	MYC	1264
MsLAC144	MYC	1873
MsLAC144	TCT-motif	70	part of a light responsive element
MsLAC144	TCT-motif	1792	part of a light responsive element
MsLAC144	CGTCA-motif	1350	cis-acting regulatory element involved in the MeJA-responsiveness
MsLAC144	CGTCA-motif	1482	cis-acting regulatory element involved in the MeJA-responsiveness
MsLAC144	GCN4_motif	541	cis-regulatory element involved in endosperm expression
MsLAC144	as-1	1350
MsLAC144	as-1	1482
MsLAC144	WUN-motif	1252
MsLAC144	Myb-binding site	1131
MsLAC144	P-box	1119	gibberellin-responsive element
MsLAC144	P-box	1662	gibberellin-responsive element
MsLAC144	MYB	610
MsLAC144	MYB	1131
MsLAC144	MYB	1340
MsLAC144	MYB	1584
MsLAC144	MYB	1918
MsLAC144	TCA-element	1691	cis-acting element involved in salicylic acid responsiveness
MsLAC144	ABRE	1618	cis-acting element involved in the abscisic acid responsiveness
MsLAC144	ABRE	1619	cis-acting element involved in the abscisic acid responsiveness
MsLAC144	TGACG-motif	1350	cis-acting regulatory element involved in the MeJA-responsiveness
MsLAC144	TGACG-motif	1482	cis-acting regulatory element involved in the MeJA-responsiveness
MsLAC145	Myb-binding site	313
MsLAC145	Myb-binding site	1088
MsLAC145	WUN-motif	1259
MsLAC145	WUN-motif	1565
MsLAC145	as-1	1675
MsLAC145	TGACG-motif	1675	cis-acting regulatory element involved in the MeJA-responsiveness
MsLAC145	GATA-motif	244	part of a light responsive element
MsLAC145	TCA-element	1376	cis-acting element involved in salicylic acid responsiveness
MsLAC145	MYB	144
MsLAC145	MYB	313
MsLAC145	MYB	966
MsLAC145	MYB	1088
MsLAC145	MYB	1605
MsLAC145	Myb	310
MsLAC145	Myb	337
MsLAC145	Myb	400
MsLAC145	Myb	929
MsLAC145	Box 4	270	part of a conserved DNA module involved in light responsiveness
MsLAC145	CGTCA-motif	1675	cis-acting regulatory element involved in the MeJA-responsiveness
MsLAC145	TC-rich repeats	339	cis-acting element involved in defense and stress responsiveness
MsLAC145	ARE	843	cis-acting regulatory element essential for the anaerobic induction
MsLAC145	MYC	1182
MsLAC145	CAT-box	1023	cis-acting regulatory element related to meristem expression
MsLAC145	TCCC-motif	430	part of a light responsive element
MsLAC145	AE-box	231	part of a module for light response
MsLAC145	STRE	1764
MsLAC145	GA-motif	1215	part of a light responsive element
MsLAC145	LTR	520	cis-acting element involved in low-temperature responsiveness
MsLAC145	G-box	1031	cis-acting regulatory element involved in light responsiveness
MsLAC145	MBS	400	MYB binding site involved in drought-inducibility
MsLAC145	MBS	929	MYB binding site involved in drought-inducibility
MsLAC145	ERE	63
MsLAC146	CCAAT-box	1900	MYBHv1 binding site
MsLAC146	W box	361
MsLAC146	W box	1891
MsLAC146	MYB recognition site	1900
MsLAC146	AE-box	1812	part of a module for light response
MsLAC146	GA-motif	670	part of a light responsive element
MsLAC146	GARE-motif	370	gibberellin-responsive element
MsLAC146	GARE-motif	694	gibberellin-responsive element
MsLAC146	AAGAA-motif	687
MsLAC146	AAGAA-motif	1018
[truncated: 5,401 more rows]

## Sheet: Sheet2
MsLAC1	1722	1742	gibberellin-responsive element							GARE-motif
MsLAC1	688	708	light responsive element							GT1-motif
MsLAC1	554	574	The abscisic acid responsiveness							ABRE
MsLAC1	623	643	The abscisic acid responsiveness							ABRE
MsLAC1	1229	1249	The abscisic acid responsiveness							ABRE
MsLAC1	1277	1297	The abscisic acid responsiveness							ABRE
MsLAC1	1296	1316	The abscisic acid responsiveness							ABRE
MsLAC1	1372	1392	The abscisic acid responsiveness							ABRE
MsLAC1	178	198	salicylic acid responsiveness							TCA-element
MsLAC1	1096	1116	salicylic acid responsiveness							TCA-element
MsLAC1	612	632	defense and stress responsiveness							TC-rich repeats
MsLAC1	1075	1095	Light responsiveness							MRE
MsLAC10	1791	1811	MYBHv1 binding site							CCAAT-box
MsLAC10	1165	1185	light responsive element							GT1-motif
MsLAC10	1166	1186	light responsive element							GT1-motif
MsLAC10	1167	1187	flavonoid biosynthetic genes regulation							MBSI
MsLAC10	782	802	salicylic acid responsiveness							TCA-element
MsLAC10	1181	1201	salicylic acid responsiveness							TCA-element
MsLAC10	1304	1324	salicylic acid responsiveness							TCA-element
MsLAC100	247	267	Light responsiveness							MRE
MsLAC100	349	369	Light responsiveness							MRE
MsLAC100	992	1012	Light responsiveness							MRE
MsLAC100	1183	1203	Light responsiveness							MRE
MsLAC100	512	532	The MeJA-responsiveness							CGTCA-motif
MsLAC100	1573	1593	The abscisic acid responsiveness							ABRE
MsLAC100	512	532	The MeJA-responsiveness							TGACG-motif
MsLAC100	990	1010	light responsive element							GT1-motif
MsLAC101	59	79	The MeJA-responsiveness							CGTCA-motif
MsLAC101	260	280	The MeJA-responsiveness							CGTCA-motif
MsLAC101	507	527	The MeJA-responsiveness							CGTCA-motif
MsLAC101	565	585	The MeJA-responsiveness							CGTCA-motif
MsLAC101	973	993	auxin-responsive element							TGA-element
MsLAC101	198	218	The abscisic acid responsiveness							ABRE
MsLAC101	1248	1268	The abscisic acid responsiveness							ABRE
MsLAC101	59	79	The MeJA-responsiveness							TGACG-motif
MsLAC101	260	280	The MeJA-responsiveness							TGACG-motif
MsLAC101	507	527	The MeJA-responsiveness							TGACG-motif
MsLAC101	565	585	The MeJA-responsiveness							TGACG-motif
MsLAC101	1410	1430	gibberellin-responsiveness							TATC-box
MsLAC101	748	768	drought-inducibility							MBS
MsLAC101	978	998	drought-inducibility							MBS
MsLAC102	633	653	defense and stress responsiveness							TC-rich repeats
MsLAC102	698	718	The MeJA-responsiveness							CGTCA-motif
MsLAC102	1724	1744	The MeJA-responsiveness							CGTCA-motif
MsLAC102	698	718	The MeJA-responsiveness							TGACG-motif
MsLAC102	1724	1744	The MeJA-responsiveness							TGACG-motif
MsLAC103	527	547	light responsive element							GT1-motif
MsLAC103	528	548	light responsive element							GT1-motif
MsLAC103	730	750	light responsive element							GT1-motif
MsLAC103	1243	1263	light responsive element							GT1-motif
MsLAC103	222	242	low-temperature responsiveness							LTR
MsLAC103	1393	1413	drought-inducibility							MBS
MsLAC103	633	653	The abscisic acid responsiveness							ABRE
MsLAC103	727	747	The abscisic acid responsiveness							ABRE
MsLAC103	837	857	The abscisic acid responsiveness							ABRE
MsLAC104	470	490	light responsive element							GT1-motif
MsLAC104	208	228	gibberellin-responsive element							P-box
MsLAC104	1946	1966	The abscisic acid responsiveness							ABRE
MsLAC104	1153	1173	salicylic acid responsiveness							TCA-element
MsLAC105	104	124	salicylic acid responsiveness							TCA-element
MsLAC105	552	572	light responsive element							GT1-motif
MsLAC105	702	722	light responsive element							GT1-motif
MsLAC105	1948	1968	light responsive element							GT1-motif
MsLAC105	1958	1978	light responsive element							GT1-motif
MsLAC105	1491	1511	MYBHv1 binding site							CCAAT-box
MsLAC106	1013	1033	drought-inducibility							MBS
MsLAC106	807	827	low-temperature responsiveness							LTR
MsLAC106	271	291	gibberellin-responsive element							GARE-motif
MsLAC106	871	891	light responsive element							GT1-motif
MsLAC106	1554	1574	light responsive element							GT1-motif
MsLAC106	1555	1575	light responsive element							GT1-motif
MsLAC106	1196	1216	auxin responsiveness							AuxRR-core
MsLAC106	1473	1493	auxin-responsive element							TGA-element
MsLAC107	892	912	Light responsiveness							MRE
MsLAC107	994	1014	Light responsiveness							MRE
MsLAC107	1636	1656	Light responsiveness							MRE
MsLAC107	1827	1847	Light responsiveness							MRE
MsLAC107	282	302	The MeJA-responsiveness							CGTCA-motif
MsLAC107	302	322	The MeJA-responsiveness							CGTCA-motif
MsLAC107	330	350	The MeJA-responsiveness							CGTCA-motif
MsLAC107	1156	1176	The MeJA-responsiveness							CGTCA-motif
MsLAC107	282	302	The MeJA-responsiveness							TGACG-motif
MsLAC107	302	322	The MeJA-responsiveness							TGACG-motif
MsLAC107	330	350	The MeJA-responsiveness							TGACG-motif
MsLAC107	1156	1176	The MeJA-responsiveness							TGACG-motif
MsLAC107	1634	1654	light responsive element							GT1-motif
MsLAC108	334	354	salicylic acid responsiveness							TCA-element
MsLAC108	1156	1176	The MeJA-responsiveness							TGACG-motif
MsLAC108	1156	1176	The MeJA-responsiveness							CGTCA-motif
MsLAC108	892	912	Light responsiveness							MRE
MsLAC108	994	1014	Light responsiveness							MRE
MsLAC108	1636	1656	Light responsiveness							MRE
MsLAC108	1827	1847	Light responsiveness							MRE
MsLAC108	703	723	light responsive element							GT1-motif
MsLAC108	1634	1654	light responsive element							GT1-motif
MsLAC109	754	774	drought-inducibility							MBS
MsLAC109	984	1004	drought-inducibility							MBS
MsLAC109	1416	1436	gibberellin-responsiveness							TATC-box
MsLAC109	65	85	The MeJA-responsiveness							TGACG-motif
MsLAC109	266	286	The MeJA-responsiveness							TGACG-motif
MsLAC109	513	533	The MeJA-responsiveness							TGACG-motif
MsLAC109	571	591	The MeJA-responsiveness							TGACG-motif
MsLAC109	204	224	The abscisic acid responsiveness							ABRE
MsLAC109	1254	1274	The abscisic acid responsiveness							ABRE
MsLAC109	979	999	auxin-responsive element							TGA-element
MsLAC109	65	85	The MeJA-responsiveness							CGTCA-motif
MsLAC109	266	286	The MeJA-responsiveness							CGTCA-motif
MsLAC109	513	533	The MeJA-responsiveness							CGTCA-motif
MsLAC109	571	591	The MeJA-responsiveness							CGTCA-motif
MsLAC11	991	1011	The MeJA-responsiveness							TGACG-motif
MsLAC11	1447	1467	The MeJA-responsiveness							TGACG-motif
MsLAC11	16	36	The abscisic acid responsiveness							ABRE
MsLAC11	991	1011	The MeJA-responsiveness							CGTCA-motif
MsLAC11	1447	1467	The MeJA-responsiveness							CGTCA-motif
MsLAC11	475	495	Light responsiveness							MRE
MsLAC11	949	969	defense and stress responsiveness							TC-rich repeats
MsLAC110	695	715	The MeJA-responsiveness							TGACG-motif
MsLAC110	1724	1744	The MeJA-responsiveness							TGACG-motif
MsLAC110	630	650	defense and stress responsiveness							TC-rich repeats
MsLAC110	695	715	The MeJA-responsiveness							CGTCA-motif
MsLAC110	1724	1744	The MeJA-responsiveness							CGTCA-motif
MsLAC111	395	415	part of an auxin-responsive element							TGA-box
MsLAC111	372	392	The MeJA-responsiveness							TGACG-motif
MsLAC111	395	415	The MeJA-responsiveness							TGACG-motif
MsLAC111	370	390	The abscisic acid responsiveness							ABRE
MsLAC111	372	392	The MeJA-responsiveness							CGTCA-motif
MsLAC111	395	415	The MeJA-responsiveness							CGTCA-motif
MsLAC111	682	702	low-temperature responsiveness							LTR
MsLAC111	1399	1419	drought-inducibility							MBS
MsLAC111	955	975	light responsive element							GT1-motif
MsLAC111	956	976	light responsive element							GT1-motif
MsLAC111	1249	1269	light responsive element							GT1-motif
MsLAC112	1478	1498	light responsive element							GT1-motif
MsLAC112	124	144	defense and stress responsiveness							TC-rich repeats
MsLAC112	750	770	defense and stress responsiveness							TC-rich repeats
MsLAC112	553	573	wound-responsive element							WUN-motif
MsLAC112	1217	1237	gibberellin-responsive element							P-box
MsLAC112	568	588	The abscisic acid responsiveness							ABRE
MsLAC112	941	961	salicylic acid responsiveness							TCA-element
MsLAC113	1488	1508	MYBHv1 binding site							CCAAT-box
MsLAC113	553	573	light responsive element							GT1-motif
MsLAC113	704	724	light responsive element							GT1-motif
MsLAC113	1943	1963	light responsive element							GT1-motif
MsLAC113	105	125	salicylic acid responsiveness							TCA-element
MsLAC113	1357	1377	salicylic acid responsiveness							TCA-element
MsLAC113	1296	1316	auxin-responsive element							TGA-element
MsLAC114	1011	1031	light responsive element							GT1-motif
MsLAC114	1196	1216	light responsive element							GT1-motif
MsLAC114	729	749	gibberellin-responsive element							P-box
MsLAC114	913	933	salicylic acid responsiveness							TCA-element
MsLAC114	275	295	The abscisic acid responsiveness							ABRE
MsLAC114	1321	1341	The abscisic acid responsiveness							ABRE
MsLAC114	446	466	flavonoid biosynthetic genes regulation							MBSI
MsLAC114	423	443	auxin responsiveness							AuxRR-core
MsLAC115	16	36	MYBHv1 binding site							CCAAT-box
MsLAC115	112	132	drought-inducibility							MBS
MsLAC115	983	1003	light responsive element							GT1-motif
MsLAC115	1567	1587	The abscisic acid responsiveness							ABRE
MsLAC115	1582	1602	salicylic acid responsiveness							TCA-element
MsLAC115	985	1005	Light responsiveness							MRE
MsLAC115	1176	1196	Light responsiveness							MRE
MsLAC116	206	226	The abscisic acid responsiveness							ABRE
MsLAC116	1264	1284	The abscisic acid responsiveness							ABRE
MsLAC116	67	87	The MeJA-responsiveness							TGACG-motif
MsLAC116	536	556	The MeJA-responsiveness							TGACG-motif
MsLAC116	588	608	The MeJA-responsiveness							TGACG-motif
MsLAC116	67	87	The MeJA-responsiveness							CGTCA-motif
MsLAC116	536	556	The MeJA-responsiveness							CGTCA-motif
MsLAC116	588	608	The MeJA-responsiveness							CGTCA-motif
MsLAC116	997	1017	auxin-responsive element							TGA-element
MsLAC116	1426	1446	gibberellin-responsiveness							TATC-box
MsLAC116	772	792	drought-inducibility							MBS
MsLAC116	1002	1022	drought-inducibility							MBS
MsLAC117	1712	1732	wound-responsive element							WUN-motif
MsLAC117	848	868	The MeJA-responsiveness							TGACG-motif
MsLAC117	783	803	defense and stress responsiveness							TC-rich repeats
MsLAC117	848	868	The MeJA-responsiveness							CGTCA-motif
MsLAC118	304	324	The MeJA-responsiveness							CGTCA-motif
MsLAC118	327	347	The MeJA-responsiveness							CGTCA-motif
MsLAC118	327	347	part of an auxin-responsive element							TGA-box
MsLAC118	302	322	The abscisic acid responsiveness							ABRE
MsLAC118	304	324	The MeJA-responsiveness							TGACG-motif
MsLAC118	327	347	The MeJA-responsiveness							TGACG-motif
MsLAC118	895	915	light responsive element							GT1-motif
MsLAC118	896	916	light responsive element							GT1-motif
MsLAC118	1179	1199	light responsive element							GT1-motif
MsLAC118	1395	1415	drought-inducibility							MBS
MsLAC118	626	646	low-temperature responsiveness							LTR
MsLAC119	617	637	salicylic acid responsiveness							TCA-element
MsLAC119	1737	1757	MYBHv1 binding site							CCAAT-box
MsLAC119	1275	1295	flavonoid biosynthetic genes regulation							MBSI
MsLAC12	1641	1661	The MeJA-responsiveness							TGACG-motif
MsLAC12	56	76	The abscisic acid responsiveness							ABRE
MsLAC12	1641	1661	The MeJA-responsiveness							CGTCA-motif
MsLAC12	667	687	Light responsiveness							MRE
MsLAC12	1141	1161	defense and stress responsiveness							TC-rich repeats
MsLAC120	3	23	The MeJA-responsiveness							CGTCA-motif
MsLAC120	157	177	The MeJA-responsiveness							CGTCA-motif
MsLAC120	3	23	The MeJA-responsiveness							TGACG-motif
MsLAC120	157	177	The MeJA-responsiveness							TGACG-motif
MsLAC120	1943	1963	light responsive element							GT1-motif
MsLAC120	713	733	drought-inducibility							MBS
MsLAC120	1489	1509	MYBHv1 binding site							CCAAT-box
MsLAC121	347	367	The MeJA-responsiveness							TGACG-motif
MsLAC121	367	387	The MeJA-responsiveness							TGACG-motif
MsLAC121	1156	1176	The MeJA-responsiveness							TGACG-motif
MsLAC121	29	49	Light responsiveness							MRE
MsLAC121	994	1014	Light responsiveness							MRE
MsLAC121	1636	1656	Light responsiveness							MRE
MsLAC121	1827	1847	Light responsiveness							MRE
MsLAC121	347	367	The MeJA-responsiveness							CGTCA-motif
MsLAC121	367	387	The MeJA-responsiveness							CGTCA-motif
MsLAC121	1156	1176	The MeJA-responsiveness							CGTCA-motif
MsLAC121	1634	1654	light responsive element							GT1-motif
MsLAC122	1426	1446	gibberellin-responsiveness							TATC-box
MsLAC122	772	792	drought-inducibility							MBS
MsLAC122	1002	1022	drought-inducibility							MBS
MsLAC122	997	1017	auxin-responsive element							TGA-element
MsLAC122	66	86	The MeJA-responsiveness							CGTCA-motif
MsLAC122	87	107	The MeJA-responsiveness							CGTCA-motif
MsLAC122	288	308	The MeJA-responsiveness							CGTCA-motif
MsLAC122	536	556	The MeJA-responsiveness							CGTCA-motif
MsLAC122	588	608	The MeJA-responsiveness							CGTCA-motif
MsLAC122	64	84	The abscisic acid responsiveness							ABRE
MsLAC122	226	246	The abscisic acid responsiveness							ABRE
MsLAC122	1264	1284	The abscisic acid responsiveness							ABRE
MsLAC122	66	86	The MeJA-responsiveness							TGACG-motif
MsLAC122	87	107	The MeJA-responsiveness							TGACG-motif
MsLAC122	288	308	The MeJA-responsiveness							TGACG-motif
MsLAC122	536	556	The MeJA-responsiveness							TGACG-motif
MsLAC122	588	608	The MeJA-responsiveness							TGACG-motif
MsLAC123	697	717	The MeJA-responsiveness							TGACG-motif
MsLAC123	1724	1744	The MeJA-responsiveness							TGACG-motif
MsLAC123	697	717	The MeJA-responsiveness							CGTCA-motif
MsLAC123	1724	1744	The MeJA-responsiveness							CGTCA-motif
MsLAC123	632	652	defense and stress responsiveness							TC-rich repeats
MsLAC124	686	706	The abscisic acid responsiveness							ABRE
MsLAC124	1117	1137	The abscisic acid responsiveness							ABRE
MsLAC124	202	222	light responsive element							GT1-motif
MsLAC124	203	223	light responsive element							GT1-motif
MsLAC124	634	654	MYBHv1 binding site							CCAAT-box
MsLAC125	228	248	low-temperature responsiveness							LTR
MsLAC125	1750	1770	MYBHv1 binding site							CCAAT-box
MsLAC125	106	126	drought-inducibility							MBS
MsLAC125	593	613	The abscisic acid responsiveness							ABRE
MsLAC126	1314	1334	defense and stress responsiveness							TC-rich repeats
MsLAC126	862	882	The MeJA-responsiveness							CGTCA-motif
MsLAC126	230	250	salicylic acid responsiveness							TCA-element
MsLAC126	877	897	The abscisic acid responsiveness							ABRE
MsLAC126	1192	1212	The abscisic acid responsiveness							ABRE
MsLAC126	1194	1214	The abscisic acid responsiveness							ABRE
MsLAC126	1195	1215	The abscisic acid responsiveness							ABRE
MsLAC126	862	882	The MeJA-responsiveness							TGACG-motif
MsLAC126	599	619	light responsive element							GT1-motif
MsLAC126	785	805	light responsive element							GT1-motif
MsLAC126	1959	1979	light responsive element							GT1-motif
MsLAC126	1944	1964	gibberellin-responsive element							GARE-motif
MsLAC126	495	515	drought-inducibility							MBS
MsLAC126	1823	1843	drought-inducibility							MBS
MsLAC127	1486	1506	MYBHv1 binding site							CCAAT-box
MsLAC127	307	327	light responsive element							GT1-motif
MsLAC127	457	477	light responsive element							GT1-motif
MsLAC127	1943	1963	light responsive element							GT1-motif
MsLAC128	691	711	drought-inducibility							MBS
MsLAC128	742	762	drought-inducibility							MBS
MsLAC128	638	658	light responsive element							GT1-motif
MsLAC128	1968	1988	gibberellin-responsive element							P-box
MsLAC128	335	355	defense and stress responsiveness							TC-rich repeats
MsLAC129	959	979	wound-responsive element							WUN-motif
MsLAC129	1666	1686	The MeJA-responsiveness							TGACG-motif
MsLAC129	415	435	The abscisic acid responsiveness							ABRE
MsLAC129	1364	1384	salicylic acid responsiveness							TCA-element
MsLAC129	1666	1686	The MeJA-responsiveness							CGTCA-motif
MsLAC129	107	127	low-temperature responsiveness							LTR
MsLAC129	604	624	drought-inducibility							MBS
MsLAC13	1171	1191	gibberellin-responsive element							P-box
MsLAC13	598	618	salicylic acid responsiveness							TCA-element
MsLAC13	26	46	The abscisic acid responsiveness							ABRE
MsLAC13	115	135	The abscisic acid responsiveness							ABRE
MsLAC13	141	161	The abscisic acid responsiveness							ABRE
MsLAC13	803	823	defense and stress responsiveness							TC-rich repeats
MsLAC13	824	844	MYBHv1 binding site							CCAAT-box
MsLAC13	1745	1765	MYBHv1 binding site							CCAAT-box
MsLAC13	1540	1560	light responsive element							GT1-motif
MsLAC130	1475	1495	The MeJA-responsiveness							TGACG-motif
MsLAC130	1477	1497	The abscisic acid responsiveness							ABRE
MsLAC130	181	201	salicylic acid responsiveness							TCA-element
MsLAC130	1177	1197	salicylic acid responsiveness							TCA-element
MsLAC130	53	73	flavonoid biosynthetic genes regulation							MBSI
MsLAC130	1052	1072	Light responsiveness							MRE
MsLAC130	1660	1680	Light responsiveness							MRE
MsLAC130	153	173	auxin-responsive element							TGA-element
MsLAC130	1475	1495	The MeJA-responsiveness							CGTCA-motif
MsLAC130	1305	1325	defense and stress responsiveness							TC-rich repeats
MsLAC130	220	240	low-temperature responsiveness							LTR
MsLAC130	425	445	light responsive element							GT1-motif
MsLAC130	426	446	light responsive element							GT1-motif
MsLAC130	554	574	light responsive element							GT1-motif
MsLAC131	164	184	light responsive element							GT1-motif
MsLAC131	275	295	flavonoid biosynthetic genes regulation							MBSI
MsLAC131	1698	1718	defense and stress responsiveness							TC-rich repeats
MsLAC132	1517	1537	The MeJA-responsiveness							CGTCA-motif
MsLAC132	1800	1820	The MeJA-responsiveness							CGTCA-motif
MsLAC132	129	149	defense and stress responsiveness							TC-rich repeats
MsLAC132	790	810	gibberellin-responsive element							P-box
MsLAC132	1517	1537	The MeJA-responsiveness							TGACG-motif
MsLAC132	1800	1820	The MeJA-responsiveness							TGACG-motif
MsLAC132	1078	1098	The abscisic acid responsiveness							ABRE
MsLAC132	1080	1100	The abscisic acid responsiveness							ABRE
MsLAC132	1081	1101	The abscisic acid responsiveness							ABRE
MsLAC132	1120	1140	The abscisic acid responsiveness							ABRE
MsLAC132	1122	1142	The abscisic acid responsiveness							ABRE
MsLAC132	1798	1818	The abscisic acid responsiveness							ABRE
MsLAC132	1845	1865	light responsive element							GT1-motif
MsLAC133	1349	1369	gibberellin-responsive element							P-box
MsLAC133	1170	1190	The abscisic acid responsiveness							ABRE
MsLAC133	1874	1894	defense and stress responsiveness							TC-rich repeats
MsLAC133	76	96	MYBHv1 binding site							CCAAT-box
MsLAC133	59	79	drought-inducibility							MBS
MsLAC133	1409	1429	drought-inducibility							MBS
MsLAC133	26	46	light responsive element							GT1-motif
MsLAC133	27	47	light responsive element							GT1-motif
MsLAC133	842	862	light responsive element							GT1-motif
MsLAC134	615	635	defense and stress responsiveness							TC-rich repeats
MsLAC134	1183	1203	defense and stress responsiveness							TC-rich repeats
MsLAC134	431	451	auxin responsiveness							AuxRR-core
MsLAC134	1446	1466	light responsive element							GT1-motif
MsLAC134	1447	1467	light responsive element							GT1-motif
MsLAC134	1696	1716	light responsive element							GT1-motif
MsLAC134	1698	1718	light responsive element							GT1-motif
MsLAC134	234	254	gibberellin-responsive element							GARE-motif
MsLAC134	205	225	gibberellin-responsiveness							TATC-box
MsLAC134	145	165	drought-inducibility							MBS
MsLAC134	26	46	MYBHv1 binding site							CCAAT-box
MsLAC134	41	61	MYBHv1 binding site							CCAAT-box
MsLAC135	635	655	light responsive element							GT1-motif
MsLAC135	674	694	MYBHv1 binding site							CCAAT-box
MsLAC135	265	285	drought-inducibility							MBS
MsLAC135	630	650	drought-inducibility							MBS
MsLAC135	818	838	drought-inducibility							MBS
MsLAC135	1353	1373	defense and stress responsiveness							TC-rich repeats
MsLAC135	1176	1196	flavonoid biosynthetic genes regulation							MBSI
MsLAC135	1295	1315	The abscisic acid responsiveness							ABRE
MsLAC135	1477	1497	The abscisic acid responsiveness							ABRE
MsLAC135	1478	1498	The abscisic acid responsiveness							ABRE
MsLAC135	238	258	gibberellin-responsive element							P-box
MsLAC136	1168	1188	Light responsiveness							MRE
MsLAC136	469	489	The MeJA-responsiveness							CGTCA-motif
MsLAC136	1386	1406	The abscisic acid responsiveness							ABRE
MsLAC136	1387	1407	The abscisic acid responsiveness							ABRE
MsLAC136	469	489	The MeJA-responsiveness							TGACG-motif
MsLAC136	1196	1216	auxin responsiveness							AuxRR-core
MsLAC136	703	723	light responsive element							GT1-motif
MsLAC136	996	1016	gibberellin-responsiveness							TATC-box
MsLAC137	1525	1545	gibberellin-responsive element							GARE-motif
MsLAC137	1582	1602	gibberellin-responsive element							GARE-motif
MsLAC137	939	959	light responsive element							GT1-motif
MsLAC137	1195	1215	light responsive element							GT1-motif
MsLAC137	1196	1216	light responsive element							GT1-motif
MsLAC137	1685	1705	low-temperature responsiveness							LTR
MsLAC137	836	856	drought-inducibility							MBS
MsLAC137	1572	1592	drought-inducibility							MBS
MsLAC137	1560	1580	The MeJA-responsiveness							CGTCA-motif
MsLAC137	1909	1929	The MeJA-responsiveness							CGTCA-motif
MsLAC137	1037	1057	defense and stress responsiveness							TC-rich repeats
MsLAC137	446	466	gibberellin-responsive element							P-box
MsLAC137	1560	1580	The MeJA-responsiveness							TGACG-motif
MsLAC137	1909	1929	The MeJA-responsiveness							TGACG-motif
MsLAC137	659	679	The abscisic acid responsiveness							ABRE
MsLAC137	660	680	The abscisic acid responsiveness							ABRE
MsLAC137	981	1001	The abscisic acid responsiveness							ABRE
MsLAC137	983	1003	The abscisic acid responsiveness							ABRE
MsLAC137	258	278	salicylic acid responsiveness							TCA-element
MsLAC138	562	582	The abscisic acid responsiveness							ABRE
MsLAC138	1398	1418	The abscisic acid responsiveness							ABRE
MsLAC138	1399	1419	The abscisic acid responsiveness							ABRE
MsLAC138	261	281	flavonoid biosynthetic genes regulation							MBSI
MsLAC138	865	885	light responsive element							GT1-motif
MsLAC138	1156	1176	gibberellin-responsiveness							TATC-box
MsLAC138	1104	1124	MYBHv1 binding site							CCAAT-box
MsLAC138	1264	1284	MYBHv1 binding site							CCAAT-box
MsLAC138	1457	1477	drought-inducibility							MBS
MsLAC139	998	1018	defense and stress responsiveness							TC-rich repeats
MsLAC139	1562	1582	defense and stress responsiveness							TC-rich repeats
MsLAC139	364	384	The MeJA-responsiveness							CGTCA-motif
MsLAC139	367	387	The abscisic acid responsiveness							ABRE
MsLAC139	364	384	The MeJA-responsiveness							TGACG-motif
MsLAC139	19	39	gibberellin-responsive element							P-box
MsLAC139	819	839	auxin responsiveness							AuxRR-core
MsLAC139	1825	1845	light responsive element							GT1-motif
MsLAC139	1826	1846	light responsive element							GT1-motif
MsLAC139	614	634	gibberellin-responsiveness							TATC-box
MsLAC139	451	471	MYBHv1 binding site							CCAAT-box
MsLAC139	46	66	drought-inducibility							MBS
MsLAC139	555	575	drought-inducibility							MBS
MsLAC139	993	1013	drought-inducibility							MBS
MsLAC14	746	766	salicylic acid responsiveness							TCA-element
MsLAC14	1145	1165	salicylic acid responsiveness							TCA-element
MsLAC14	1268	1288	salicylic acid responsiveness							TCA-element
MsLAC14	1131	1151	flavonoid biosynthetic genes regulation							MBSI
MsLAC14	1129	1149	light responsive element							GT1-motif
MsLAC14	1130	1150	light responsive element							GT1-motif
MsLAC14	298	318	MYBHv1 binding site							CCAAT-box
MsLAC14	1791	1811	MYBHv1 binding site							CCAAT-box
MsLAC140	746	766	light responsive element							GT1-motif
MsLAC140	314	334	The abscisic acid responsiveness							ABRE
MsLAC140	1073	1093	The abscisic acid responsiveness							ABRE
MsLAC140	1157	1177	The abscisic acid responsiveness							ABRE
MsLAC140	1255	1275	The abscisic acid responsiveness							ABRE
MsLAC140	221	241	The MeJA-responsiveness							TGACG-motif
MsLAC140	1874	1894	defense and stress responsiveness							TC-rich repeats
MsLAC140	221	241	The MeJA-responsiveness							CGTCA-motif
MsLAC141	1354	1374	MYBHv1 binding site							CCAAT-box
MsLAC141	725	745	drought-inducibility							MBS
MsLAC141	938	958	drought-inducibility							MBS
MsLAC141	1156	1176	drought-inducibility							MBS
MsLAC141	507	527	The MeJA-responsiveness							CGTCA-motif
MsLAC141	658	678	wound-responsive element							WUN-motif
MsLAC141	97	117	salicylic acid responsiveness							TCA-element
MsLAC141	507	527	The MeJA-responsiveness							TGACG-motif
MsLAC142	609	629	defense and stress responsiveness							TC-rich repeats
MsLAC142	782	802	The MeJA-responsiveness							CGTCA-motif
MsLAC142	936	956	The MeJA-responsiveness							CGTCA-motif
MsLAC142	1595	1615	The abscisic acid responsiveness							ABRE
MsLAC142	782	802	The MeJA-responsiveness							TGACG-motif
MsLAC142	936	956	The MeJA-responsiveness							TGACG-motif
MsLAC142	1843	1863	auxin responsiveness							AuxRR-core
MsLAC142	205	225	light responsive element							GT1-motif
MsLAC142	1588	1608	light responsive element							GT1-motif
MsLAC142	1590	1610	light responsive element							GT1-motif
MsLAC142	1252	1272	MYBHv1 binding site							CCAAT-box
MsLAC142	276	296	low-temperature responsiveness							LTR
MsLAC143	1699	1719	defense and stress responsiveness							TC-rich repeats
MsLAC144	1350	1370	The MeJA-responsiveness							CGTCA-motif
MsLAC144	1482	1502	The MeJA-responsiveness							CGTCA-motif
MsLAC144	1119	1139	gibberellin-responsive element							P-box
MsLAC144	1662	1682	gibberellin-responsive element							P-box
MsLAC144	1691	1711	salicylic acid responsiveness							TCA-element
MsLAC144	1618	1638	The abscisic acid responsiveness							ABRE
MsLAC144	1619	1639	The abscisic acid responsiveness							ABRE
MsLAC144	1350	1370	The MeJA-responsiveness							TGACG-motif
MsLAC144	1482	1502	The MeJA-responsiveness							TGACG-motif
MsLAC145	1675	1695	The MeJA-responsiveness							TGACG-motif
MsLAC145	1376	1396	salicylic acid responsiveness							TCA-element
MsLAC145	1675	1695	The MeJA-responsiveness							CGTCA-motif
MsLAC145	339	359	defense and stress responsiveness							TC-rich repeats
MsLAC145	520	540	low-temperature responsiveness							LTR
MsLAC145	400	420	drought-inducibility							MBS
MsLAC145	929	949	drought-inducibility							MBS
MsLAC146	1900	1920	MYBHv1 binding site							CCAAT-box
MsLAC146	370	390	gibberellin-responsive element							GARE-motif
MsLAC146	694	714	gibberellin-responsive element							GARE-motif
MsLAC146	170	190	light responsive element							GT1-motif
MsLAC146	1121	1141	light responsive element							GT1-motif
MsLAC146	1191	1211	The MeJA-responsiveness							TGACG-motif
MsLAC146	1594	1614	The MeJA-responsiveness							TGACG-motif
MsLAC146	1383	1403	defense and stress responsiveness							TC-rich repeats
MsLAC146	1191	1211	The MeJA-responsiveness							CGTCA-motif
MsLAC146	1594	1614	The MeJA-responsiveness							CGTCA-motif
MsLAC147	370	390	gibberellin-responsive element							GARE-motif
MsLAC147	694	714	gibberellin-responsive element							GARE-motif
MsLAC147	170	190	light responsive element							GT1-motif
MsLAC147	1121	1141	light responsive element							GT1-motif
MsLAC147	1900	1920	MYBHv1 binding site							CCAAT-box
MsLAC147	1383	1403	defense and stress responsiveness							TC-rich repeats
MsLAC147	1191	1211	The MeJA-responsiveness							CGTCA-motif
MsLAC147	1594	1614	The MeJA-responsiveness							CGTCA-motif
MsLAC147	1191	1211	The MeJA-responsiveness							TGACG-motif
MsLAC147	1594	1614	The MeJA-responsiveness							TGACG-motif
MsLAC148	1679	1699	low-temperature responsiveness							LTR
MsLAC148	1574	1594	drought-inducibility							MBS
MsLAC148	1922	1942	drought-inducibility							MBS
MsLAC148	1527	1547	gibberellin-responsive element							GARE-motif
MsLAC148	44	64	light responsive element							GT1-motif
MsLAC148	293	313	light responsive element							GT1-motif
MsLAC148	294	314	light responsive element							GT1-motif
MsLAC148	449	469	The MeJA-responsiveness							TGACG-motif
MsLAC148	130	150	The abscisic acid responsiveness							ABRE
MsLAC148	132	152	The abscisic acid responsiveness							ABRE
MsLAC148	133	153	The abscisic acid responsiveness							ABRE
MsLAC148	1044	1064	The abscisic acid responsiveness							ABRE
MsLAC148	379	399	Light responsiveness							MRE
MsLAC148	859	879	Light responsiveness							MRE
MsLAC148	449	469	The MeJA-responsiveness							CGTCA-motif
MsLAC149	178	198	salicylic acid responsiveness							TCA-element
MsLAC149	41	61	The MeJA-responsiveness							TGACG-motif
MsLAC149	1342	1362	The MeJA-responsiveness							TGACG-motif
MsLAC149	363	383	gibberellin-responsive element							P-box
MsLAC149	41	61	The MeJA-responsiveness							CGTCA-motif
MsLAC149	1342	1362	The MeJA-responsiveness							CGTCA-motif
MsLAC149	1146	1166	Light responsiveness							MRE
MsLAC149	1491	1511	Light responsiveness							MRE
MsLAC149	1016	1036	drought-inducibility							MBS
MsLAC149	845	865	light responsive element							GT1-motif
MsLAC149	1060	1080	light responsive element							GT1-motif
MsLAC149	1061	1081	light responsive element							GT1-motif
MsLAC15	1641	1661	The MeJA-responsiveness							CGTCA-motif
MsLAC15	634	654	Light responsiveness							MRE
MsLAC15	1106	1126	defense and stress responsiveness							TC-rich repeats
MsLAC15	1641	1661	The MeJA-responsiveness							TGACG-motif
MsLAC150	172	192	wound-responsive element							WUN-motif
MsLAC150	1665	1685	The MeJA-responsiveness							TGACG-motif
MsLAC150	1191	1211	salicylic acid responsiveness							TCA-element
MsLAC150	1665	1685	The MeJA-responsiveness							CGTCA-motif
MsLAC150	579	599	auxin-responsive element							TGA-element
MsLAC150	305	325	light responsive element							GT1-motif
MsLAC150	836	856	light responsive element							GT1-motif
MsLAC150	837	857	light responsive element							GT1-motif
MsLAC151	175	195	The MeJA-responsiveness							CGTCA-motif
MsLAC151	1699	1719	defense and stress responsiveness							TC-rich repeats
MsLAC151	175	195	The MeJA-responsiveness							TGACG-motif
MsLAC151	552	572	salicylic acid responsiveness							TCA-element
MsLAC152	925	945	drought-inducibility							MBS
MsLAC152	1133	1153	drought-inducibility							MBS
MsLAC152	1351	1371	drought-inducibility							MBS
MsLAC152	1550	1570	MYBHv1 binding site							CCAAT-box
MsLAC152	858	878	wound-responsive element							WUN-motif
MsLAC152	181	201	gibberellin-responsive element							P-box
MsLAC152	707	727	The MeJA-responsiveness							TGACG-motif
MsLAC152	298	318	salicylic acid responsiveness							TCA-element
MsLAC152	707	727	The MeJA-responsiveness							CGTCA-motif
MsLAC153	864	884	light responsive element							GT1-motif
MsLAC153	356	376	The MeJA-responsiveness							CGTCA-motif
MsLAC153	1336	1356	defense and stress responsiveness							TC-rich repeats
MsLAC153	1874	1894	defense and stress responsiveness							TC-rich repeats
MsLAC153	356	376	The MeJA-responsiveness							TGACG-motif
MsLAC153	1745	1765	gibberellin-responsive element							P-box
MsLAC154	1873	1893	light responsive element							GT1-motif
MsLAC154	1874	1894	light responsive element							GT1-motif
MsLAC154	719	739	gibberellin-responsive element							GARE-motif
MsLAC154	511	531	MYBHv1 binding site							CCAAT-box
MsLAC154	526	546	MYBHv1 binding site							CCAAT-box
MsLAC154	303	323	drought-inducibility							MBS
MsLAC154	630	650	drought-inducibility							MBS
MsLAC154	690	710	gibberellin-responsiveness							TATC-box
MsLAC154	1099	1119	defense and stress responsiveness							TC-rich repeats
MsLAC154	918	938	auxin responsiveness							AuxRR-core
MsLAC154	276	296	gibberellin-responsive element							P-box
MsLAC154	262	282	The abscisic acid responsiveness							ABRE
MsLAC155	1194	1214	flavonoid biosynthetic genes regulation							MBSI
MsLAC155	1275	1295	The abscisic acid responsiveness							ABRE
MsLAC155	1276	1296	The abscisic acid responsiveness							ABRE
MsLAC155	1313	1333	The abscisic acid responsiveness							ABRE
MsLAC155	1495	1515	The abscisic acid responsiveness							ABRE
MsLAC155	1496	1516	The abscisic acid responsiveness							ABRE
MsLAC155	237	257	gibberellin-responsive element							P-box
MsLAC155	1371	1391	defense and stress responsiveness							TC-rich repeats
MsLAC155	264	284	drought-inducibility							MBS
MsLAC155	649	669	drought-inducibility							MBS
MsLAC155	837	857	drought-inducibility							MBS
MsLAC155	693	713	MYBHv1 binding site							CCAAT-box
MsLAC155	654	674	light responsive element							GT1-motif
MsLAC156	27	47	light responsive element							GT1-motif
MsLAC156	637	657	light responsive element							GT1-motif
MsLAC156	1144	1164	MYBHv1 binding site							CCAAT-box
MsLAC156	1259	1279	MYBHv1 binding site							CCAAT-box
MsLAC156	402	422	The MeJA-responsiveness							CGTCA-motif
MsLAC156	402	422	The MeJA-responsiveness							TGACG-motif
MsLAC156	1393	1413	The abscisic acid responsiveness							ABRE
MsLAC156	1394	1414	The abscisic acid responsiveness							ABRE
MsLAC157	1279	1299	low-temperature responsiveness							LTR
MsLAC157	1174	1194	drought-inducibility							MBS
MsLAC157	1522	1542	drought-inducibility							MBS
MsLAC157	1127	1147	gibberellin-responsive element							GARE-motif
MsLAC157	1761	1781	gibberellin-responsive element							GARE-motif
MsLAC157	50	70	The MeJA-responsiveness							TGACG-motif
MsLAC157	1611	1631	The MeJA-responsiveness							TGACG-motif
MsLAC157	644	664	The abscisic acid responsiveness							ABRE
MsLAC157	460	480	Light responsiveness							MRE
MsLAC157	50	70	The MeJA-responsiveness							CGTCA-motif
MsLAC157	1611	1631	The MeJA-responsiveness							CGTCA-motif
MsLAC158	1035	1055	drought-inducibility							MBS
MsLAC158	1382	1402	drought-inducibility							MBS
MsLAC158	1140	1160	low-temperature responsiveness							LTR
MsLAC158	988	1008	gibberellin-responsive element							GARE-motif
MsLAC158	1621	1641	gibberellin-responsive element							GARE-motif
MsLAC158	1928	1948	light responsive element							GT1-motif
MsLAC158	504	524	The abscisic acid responsiveness							ABRE
MsLAC158	1471	1491	The MeJA-responsiveness							TGACG-motif
MsLAC158	318	338	Light responsiveness							MRE
MsLAC158	1471	1491	The MeJA-responsiveness							CGTCA-motif
MsLAC159	1928	1948	light responsive element							GT1-motif
MsLAC159	987	1007	gibberellin-responsive element							GARE-motif
MsLAC159	1621	1641	gibberellin-responsive element							GARE-motif
MsLAC159	1139	1159	low-temperature responsiveness							LTR
MsLAC159	1034	1054	drought-inducibility							MBS
MsLAC159	1382	1402	drought-inducibility							MBS
MsLAC159	1471	1491	The MeJA-responsiveness							CGTCA-motif
MsLAC159	319	339	Light responsiveness							MRE
MsLAC159	1471	1491	The MeJA-responsiveness							TGACG-motif
MsLAC159	504	524	The abscisic acid responsiveness							ABRE
MsLAC16	1167	1187	salicylic acid responsiveness							TCA-element
MsLAC16	1289	1309	salicylic acid responsiveness							TCA-element
MsLAC16	15	35	The abscisic acid responsiveness							ABRE
MsLAC16	212	232	The abscisic acid responsiveness							ABRE
MsLAC16	605	625	The abscisic acid responsiveness							ABRE
MsLAC16	177	197	drought-inducibility							MBS
MsLAC16	72	92	MYBHv1 binding site							CCAAT-box
MsLAC16	488	508	MYBHv1 binding site							CCAAT-box
MsLAC16	1789	1809	MYBHv1 binding site							CCAAT-box
MsLAC16	792	812	low-temperature responsiveness							LTR
MsLAC160	1714	1734	The MeJA-responsiveness							TGACG-motif
MsLAC160	488	508	wound-responsive element							WUN-motif
MsLAC160	1714	1734	The MeJA-responsiveness							CGTCA-motif
MsLAC160	621	641	light responsive element							GT1-motif
MsLAC160	1146	1166	light responsive element							GT1-motif
MsLAC160	1147	1167	light responsive element							GT1-motif
MsLAC161	1365	1385	salicylic acid responsiveness							TCA-element
MsLAC161	251	271	gibberellin-responsive element							P-box
MsLAC161	1240	1260	Light responsiveness							MRE
MsLAC161	1633	1653	Light responsiveness							MRE
MsLAC161	462	482	low-temperature responsiveness							LTR
MsLAC161	215	235	light responsive element							GT1-motif
MsLAC162	394	414	The abscisic acid responsiveness							ABRE
MsLAC162	432	452	The abscisic acid responsiveness							ABRE
MsLAC162	510	530	The abscisic acid responsiveness							ABRE
MsLAC162	94	114	The MeJA-responsiveness							TGACG-motif
MsLAC162	1675	1695	defense and stress responsiveness							TC-rich repeats
MsLAC162	140	160	Light responsiveness							MRE
MsLAC162	1840	1860	Light responsiveness							MRE
MsLAC162	94	114	The MeJA-responsiveness							CGTCA-motif
MsLAC163	787	807	The MeJA-responsiveness							CGTCA-motif
MsLAC163	938	958	wound-responsive element							WUN-motif
MsLAC163	258	278	gibberellin-responsive element							P-box
MsLAC163	787	807	The MeJA-responsiveness							TGACG-motif
MsLAC163	376	396	salicylic acid responsiveness							TCA-element
MsLAC163	55	75	The abscisic acid responsiveness							ABRE
MsLAC163	1658	1678	MYBHv1 binding site							CCAAT-box
MsLAC163	1005	1025	drought-inducibility							MBS
MsLAC163	1032	1052	drought-inducibility							MBS
MsLAC163	1242	1262	drought-inducibility							MBS
MsLAC163	1460	1480	drought-inducibility							MBS
MsLAC164	476	496	salicylic acid responsiveness							TCA-element
MsLAC164	740	760	The abscisic acid responsiveness							ABRE
MsLAC164	1175	1195	The abscisic acid responsiveness							ABRE
MsLAC164	42	62	gibberellin-responsive element							P-box
MsLAC164	336	356	gibberellin-responsive element							P-box
MsLAC164	538	558	gibberellin-responsive element							P-box
MsLAC164	574	594	gibberellin-responsive element							P-box
MsLAC164	1874	1894	defense and stress responsiveness							TC-rich repeats
MsLAC164	116	136	auxin-responsive element							TGA-element
MsLAC164	26	46	MYBHv1 binding site							CCAAT-box
MsLAC164	9	29	drought-inducibility							MBS
MsLAC164	1409	1429	drought-inducibility							MBS
MsLAC164	755	775	light responsive element							GT1-motif
MsLAC165	1873	1893	light responsive element							GT1-motif
MsLAC165	1874	1894	light responsive element							GT1-motif
MsLAC165	495	515	MYBHv1 binding site							CCAAT-box
MsLAC165	69	89	drought-inducibility							MBS
MsLAC165	599	619	drought-inducibility							MBS
MsLAC165	658	678	gibberellin-responsiveness							TATC-box
MsLAC165	408	428	The MeJA-responsiveness							CGTCA-motif
MsLAC165	161	181	auxin-responsive element							TGA-element
MsLAC165	1042	1062	defense and stress responsiveness							TC-rich repeats
MsLAC165	1610	1630	defense and stress responsiveness							TC-rich repeats
MsLAC165	42	62	gibberellin-responsive element							P-box
MsLAC165	884	904	gibberellin-responsive element							P-box
MsLAC165	408	428	The MeJA-responsiveness							TGACG-motif
MsLAC165	411	431	The abscisic acid responsiveness							ABRE
MsLAC165	863	883	auxin responsiveness							AuxRR-core
MsLAC166	244	264	light responsive element							GT1-motif
MsLAC166	848	868	light responsive element							GT1-motif
MsLAC166	1265	1285	MYBHv1 binding site							CCAAT-box
MsLAC166	614	634	The MeJA-responsiveness							CGTCA-motif
MsLAC166	614	634	The MeJA-responsiveness							TGACG-motif
MsLAC166	1397	1417	The abscisic acid responsiveness							ABRE
MsLAC166	1398	1418	The abscisic acid responsiveness							ABRE
MsLAC167	657	677	drought-inducibility							MBS
MsLAC167	1517	1537	drought-inducibility							MBS
MsLAC167	441	461	gibberellin-responsive element							GARE-motif
MsLAC167	1273	1293	gibberellin-responsive element							GARE-motif
MsLAC167	135	155	light responsive element							GT1-motif
MsLAC167	136	156	light responsive element							GT1-motif
MsLAC167	165	185	gibberellin-responsive element							P-box
MsLAC167	943	963	gibberellin-responsive element							P-box
MsLAC167	1713	1733	gibberellin-responsive element							P-box
MsLAC167	1732	1752	gibberellin-responsive element							P-box
MsLAC167	983	1003	The MeJA-responsiveness							TGACG-motif
MsLAC167	1352	1372	auxin responsiveness							AuxRR-core
MsLAC167	46	66	auxin-responsive element							TGA-element
MsLAC167	983	1003	The MeJA-responsiveness							CGTCA-motif
MsLAC168	1698	1718	gibberellin-responsive element							GARE-motif
MsLAC168	1943	1963	drought-inducibility							MBS
MsLAC168	1778	1798	auxin responsiveness							AuxRR-core
MsLAC169	267	287	The abscisic acid responsiveness							ABRE
MsLAC169	439	459	The abscisic acid responsiveness							ABRE
MsLAC169	440	460	The abscisic acid responsiveness							ABRE
MsLAC169	353	373	salicylic acid responsiveness							TCA-element
MsLAC169	35	55	The MeJA-responsiveness							TGACG-motif
MsLAC169	1175	1195	defense and stress responsiveness							TC-rich repeats
MsLAC169	1369	1389	defense and stress responsiveness							TC-rich repeats
MsLAC169	1471	1491	defense and stress responsiveness							TC-rich repeats
MsLAC169	35	55	The MeJA-responsiveness							CGTCA-motif
MsLAC169	130	150	drought-inducibility							MBS
MsLAC169	603	623	MYBHv1 binding site							CCAAT-box
MsLAC169	623	643	MYBHv1 binding site							CCAAT-box
MsLAC169	757	777	light responsive element							GT1-motif
MsLAC17	487	507	Light responsiveness							MRE
MsLAC17	443	463	The abscisic acid responsiveness							ABRE
MsLAC17	458	478	The abscisic acid responsiveness							ABRE
MsLAC17	525	545	The abscisic acid responsiveness							ABRE
MsLAC17	177	197	salicylic acid responsiveness							TCA-element
MsLAC17	9	29	light responsive element							GT1-motif
MsLAC17	721	741	light responsive element							GT1-motif
MsLAC17	722	742	light responsive element							GT1-motif
MsLAC17	1664	1684	drought-inducibility							MBS
MsLAC17	153	173	low-temperature responsiveness							LTR
MsLAC17	1255	1275	low-temperature responsiveness							LTR
MsLAC170	1903	1923	defense and stress responsiveness							TC-rich repeats
MsLAC170	892	912	The MeJA-responsiveness							CGTCA-motif
MsLAC170	1456	1476	auxin responsiveness							AuxRR-core
MsLAC170	1973	1993	salicylic acid responsiveness							TCA-element
MsLAC170	670	690	The abscisic acid responsiveness							ABRE
MsLAC170	892	912	The MeJA-responsiveness							TGACG-motif
MsLAC170	1982	2002	gibberellin-responsive element							GARE-motif
MsLAC170	1017	1037	drought-inducibility							MBS
MsLAC170	824	844	low-temperature responsiveness							LTR
MsLAC170	401	421	gibberellin-responsiveness							TATC-box
MsLAC171	673	693	light responsive element							GT1-motif
MsLAC171	1201	1221	light responsive element							GT1-motif
MsLAC171	1202	1222	light responsive element							GT1-motif
MsLAC171	1718	1738	The MeJA-responsiveness							TGACG-motif
MsLAC171	115	135	auxin responsiveness							AuxRR-core
MsLAC171	933	953	auxin-responsive element							TGA-element
MsLAC171	1718	1738	The MeJA-responsiveness							CGTCA-motif
MsLAC171	1886	1906	defense and stress responsiveness							TC-rich repeats
MsLAC172	326	346	The MeJA-responsiveness							TGACG-motif
MsLAC172	517	537	The MeJA-responsiveness							TGACG-motif
MsLAC172	527	547	The MeJA-responsiveness							TGACG-motif
MsLAC172	1801	1821	The abscisic acid responsiveness							ABRE
MsLAC172	1753	1773	gibberellin-responsive element and part of a Light responsive element							P-box
MsLAC172	326	346	The MeJA-responsiveness							CGTCA-motif
MsLAC172	517	537	The MeJA-responsiveness							CGTCA-motif
MsLAC172	527	547	The MeJA-responsiveness							CGTCA-motif
MsLAC172	1290	1310	Light responsiveness							MRE
MsLAC172	375	395	defense and stress responsiveness							TC-rich repeats
MsLAC172	1142	1162	gibberellin-responsiveness							TATC-box
MsLAC173	454	474	The MeJA-responsiveness							TGACG-motif
MsLAC173	454	474	The MeJA-responsiveness							CGTCA-motif
MsLAC173	154	174	drought-inducibility							MBS
MsLAC174	1179	1199	defense and stress responsiveness							TC-rich repeats
MsLAC174	1374	1394	defense and stress responsiveness							TC-rich repeats
MsLAC174	37	57	The MeJA-responsiveness							CGTCA-motif
MsLAC174	1125	1145	The MeJA-responsiveness							CGTCA-motif
MsLAC174	267	287	The abscisic acid responsiveness							ABRE
MsLAC174	445	465	The abscisic acid responsiveness							ABRE
MsLAC174	446	466	The abscisic acid responsiveness							ABRE
MsLAC174	353	373	salicylic acid responsiveness							TCA-element
MsLAC174	37	57	The MeJA-responsiveness							TGACG-motif
MsLAC174	1125	1145	The MeJA-responsiveness							TGACG-motif
MsLAC174	763	783	light responsive element							GT1-motif
MsLAC174	609	629	MYBHv1 binding site							CCAAT-box
MsLAC174	629	649	MYBHv1 binding site							CCAAT-box
MsLAC174	130	150	drought-inducibility							MBS
MsLAC175	1169	1189	drought-inducibility							MBS
MsLAC175	872	892	low-temperature responsiveness							LTR
MsLAC175	24	44	light responsive element							GT1-motif
MsLAC175	501	521	light responsive element							GT1-motif
MsLAC175	1982	2002	gibberellin-responsive element							GARE-motif
MsLAC175	1452	1472	auxin responsiveness							AuxRR-core
MsLAC175	760	780	The abscisic acid responsiveness							ABRE
MsLAC175	1973	1993	salicylic acid responsiveness							TCA-element
MsLAC175	738	758	The MeJA-responsiveness							TGACG-motif
MsLAC175	923	943	The MeJA-responsiveness							TGACG-motif
MsLAC175	408	428	defense and stress responsiveness							TC-rich repeats
MsLAC175	1903	1923	defense and stress responsiveness							TC-rich repeats
MsLAC175	738	758	The MeJA-responsiveness							CGTCA-motif
MsLAC175	923	943	The MeJA-responsiveness							CGTCA-motif
MsLAC176	554	574	The MeJA-responsiveness							TGACG-motif
MsLAC176	462	482	The abscisic acid responsiveness							ABRE
MsLAC176	1794	1814	The abscisic acid responsiveness							ABRE
MsLAC176	750	770	auxin-responsive element							TGA-element
MsLAC176	554	574	The MeJA-responsiveness							CGTCA-motif
MsLAC176	1882	1902	defense and stress responsiveness							TC-rich repeats
MsLAC177	276	296	The MeJA-responsiveness							TGACG-motif
MsLAC177	451	471	The MeJA-responsiveness							TGACG-motif
MsLAC177	461	481	The MeJA-responsiveness							TGACG-motif
MsLAC177	617	637	The abscisic acid responsiveness							ABRE
MsLAC177	1733	1753	The abscisic acid responsiveness							ABRE
MsLAC177	1685	1705	gibberellin-responsive element and part of a Light responsive element							P-box
MsLAC177	276	296	The MeJA-responsiveness							CGTCA-motif
MsLAC177	451	471	The MeJA-responsiveness							CGTCA-motif
MsLAC177	461	481	The MeJA-responsiveness							CGTCA-motif
MsLAC177	325	345	defense and stress responsiveness							TC-rich repeats
MsLAC177	1074	1094	gibberellin-responsiveness							TATC-box
MsLAC178	765	785	light responsive element							GT1-motif
MsLAC178	611	631	MYBHv1 binding site							CCAAT-box
MsLAC178	631	651	MYBHv1 binding site							CCAAT-box
MsLAC178	138	158	drought-inducibility							MBS
MsLAC178	1181	1201	defense and stress responsiveness							TC-rich repeats
MsLAC178	1376	1396	defense and stress responsiveness							TC-rich repeats
MsLAC178	45	65	The MeJA-responsiveness							CGTCA-motif
MsLAC178	1127	1147	The MeJA-responsiveness							CGTCA-motif
MsLAC178	275	295	The abscisic acid responsiveness							ABRE
MsLAC178	447	467	The abscisic acid responsiveness							ABRE
MsLAC178	448	468	The abscisic acid responsiveness							ABRE
MsLAC178	361	381	salicylic acid responsiveness							TCA-element
MsLAC178	45	65	The MeJA-responsiveness							TGACG-motif
MsLAC178	1127	1147	The MeJA-responsiveness							TGACG-motif
MsLAC179	349	369	gibberellin-responsiveness							TATC-box
MsLAC179	771	791	low-temperature responsiveness							LTR
MsLAC179	839	859	The MeJA-responsiveness							TGACG-motif
MsLAC179	1972	1992	salicylic acid responsiveness							TCA-element
MsLAC179	1446	1466	auxin responsiveness							AuxRR-core
MsLAC179	839	859	The MeJA-responsiveness							CGTCA-motif
MsLAC18	580	600	light responsive element							GT1-motif
MsLAC18	788	808	light responsive element							GT1-motif
MsLAC18	854	874	light responsive element							GT1-motif
MsLAC18	1289	1309	light responsive element							GT1-motif
MsLAC18	1290	1310	light responsive element							GT1-motif
MsLAC18	1243	1263	auxin responsiveness							AuxRR-core
MsLAC18	1559	1579	The abscisic acid responsiveness							ABRE
MsLAC18	490	510	Light responsiveness							MRE
MsLAC180	1103	1123	light responsive element							GT1-motif
MsLAC180	1882	1902	defense and stress responsiveness							TC-rich repeats
MsLAC180	103	123	wound-responsive element							WUN-motif
MsLAC180	617	637	gibberellin-responsive element							P-box
MsLAC181	1733	1753	The abscisic acid responsiveness							ABRE
MsLAC181	255	275	The MeJA-responsiveness							TGACG-motif
MsLAC181	446	466	The MeJA-responsiveness							TGACG-motif
MsLAC181	456	476	The MeJA-responsiveness							TGACG-motif
MsLAC181	1685	1705	gibberellin-responsive element and part of a Light responsive element							P-box
MsLAC181	304	324	defense and stress responsiveness							TC-rich repeats
MsLAC181	1219	1239	Light responsiveness							MRE
MsLAC181	255	275	The MeJA-responsiveness							CGTCA-motif
MsLAC181	446	466	The MeJA-responsiveness							CGTCA-motif
MsLAC181	456	476	The MeJA-responsiveness							CGTCA-motif
MsLAC181	1071	1091	gibberellin-responsiveness							TATC-box
MsLAC182	91	111	MYBHv1 binding site							CCAAT-box
MsLAC182	1966	1986	drought-inducibility							MBS
MsLAC182	296	316	light responsive element							GT1-motif
MsLAC182	297	317	light responsive element							GT1-motif
MsLAC182	1408	1428	The abscisic acid responsiveness							ABRE
MsLAC182	1466	1486	The abscisic acid responsiveness							ABRE
MsLAC182	1499	1519	The abscisic acid responsiveness							ABRE
MsLAC182	1500	1520	The abscisic acid responsiveness							ABRE
MsLAC182	1929	1949	auxin-responsive element							TGA-element
MsLAC183	288	308	drought-inducibility							MBS
MsLAC183	277	297	The MeJA-responsiveness							TGACG-motif
MsLAC183	479	499	The MeJA-responsiveness							TGACG-motif
MsLAC183	574	594	Light responsiveness							MRE
MsLAC183	277	297	The MeJA-responsiveness							CGTCA-motif
MsLAC183	479	499	The MeJA-responsiveness							CGTCA-motif
MsLAC184	921	941	The MeJA-responsiveness							CGTCA-motif
MsLAC184	653	673	salicylic acid responsiveness							TCA-element
MsLAC184	1972	1992	salicylic acid responsiveness							TCA-element
MsLAC184	642	662	The abscisic acid responsiveness							ABRE
MsLAC184	643	663	The abscisic acid responsiveness							ABRE
MsLAC184	921	941	The MeJA-responsiveness							TGACG-motif
MsLAC184	1446	1466	auxin responsiveness							AuxRR-core
MsLAC184	433	453	gibberellin-responsiveness							TATC-box
MsLAC184	865	885	low-temperature responsiveness							LTR
MsLAC185	501	521	light responsive element							GT1-motif
MsLAC185	1034	1054	light responsive element							GT1-motif
MsLAC185	1035	1055	light responsive element							GT1-motif
MsLAC185	413	433	gibberellin-responsive element							GARE-motif
MsLAC185	1789	1809	The MeJA-responsiveness							CGTCA-motif
MsLAC185	447	467	Light responsiveness							MRE
MsLAC185	775	795	auxin-responsive element							TGA-element
MsLAC185	1789	1809	The MeJA-responsiveness							TGACG-motif
MsLAC185	225	245	The abscisic acid responsiveness							ABRE
MsLAC185	227	247	The abscisic acid responsiveness							ABRE
MsLAC185	228	248	The abscisic acid responsiveness							ABRE
MsLAC185	1738	1758	The abscisic acid responsiveness							ABRE
MsLAC185	1741	1761	The abscisic acid responsiveness							ABRE
MsLAC186	1073	1093	gibberellin-responsiveness							TATC-box
MsLAC186	291	311	The MeJA-responsiveness							TGACG-motif
MsLAC186	474	494	The MeJA-responsiveness							TGACG-motif
MsLAC186	484	504	The MeJA-responsiveness							TGACG-motif
MsLAC186	640	660	The abscisic acid responsiveness							ABRE
MsLAC186	1733	1753	The abscisic acid responsiveness							ABRE
MsLAC186	1685	1705	gibberellin-responsive element and part of a Light responsive element							P-box
MsLAC186	291	311	The MeJA-responsiveness							CGTCA-motif
MsLAC186	474	494	The MeJA-responsiveness							CGTCA-motif
MsLAC186	484	504	The MeJA-responsiveness							CGTCA-motif
MsLAC186	340	360	defense and stress responsiveness							TC-rich repeats
MsLAC19	276	296	drought-inducibility							MBS
MsLAC19	895	915	MYBHv1 binding site							CCAAT-box
MsLAC19	290	310	low-temperature responsiveness							LTR
MsLAC19	698	718	Light responsiveness							MRE
MsLAC19	1098	1118	auxin-responsive element							TGA-element
MsLAC19	98	118	The abscisic acid responsiveness							ABRE
MsLAC19	1604	1624	The abscisic acid responsiveness							ABRE
MsLAC19	1605	1625	The abscisic acid responsiveness							ABRE
MsLAC2	56	76	The abscisic acid responsiveness							ABRE
MsLAC2	57	77	The abscisic acid responsiveness							ABRE
MsLAC2	1328	1348	The abscisic acid responsiveness							ABRE
MsLAC2	30	50	salicylic acid responsiveness							TCA-element
MsLAC2	562	582	salicylic acid responsiveness							TCA-element
MsLAC2	952	972	salicylic acid responsiveness							TCA-element
MsLAC2	670	690	gibberellin-responsive element							P-box
MsLAC2	383	403	auxin-responsive element							TGA-element
MsLAC2	519	539	auxin-responsive element							TGA-element
MsLAC2	205	225	Light responsiveness							MRE
MsLAC2	2	22	drought-inducibility							MBS
MsLAC2	404	424	drought-inducibility							MBS
MsLAC2	82	102	light responsive element							GT1-motif
MsLAC2	153	173	light responsive element							GT1-motif
MsLAC2	1722	1742	gibberellin-responsive element							GARE-motif
MsLAC20	709	729	The abscisic acid responsiveness							ABRE
MsLAC20	1466	1486	The abscisic acid responsiveness							ABRE
MsLAC20	1494	1514	The abscisic acid responsiveness							ABRE
MsLAC20	424	444	light responsive element							GT1-motif
MsLAC20	425	445	light responsive element							GT1-motif
MsLAC20	969	989	MYBHv1 binding site							CCAAT-box
MsLAC21	242	262	gibberellin-responsive element							GARE-motif
MsLAC21	624	644	light responsive element							GT1-motif
MsLAC21	1247	1267	The abscisic acid responsiveness							ABRE
MsLAC21	1513	1533	The abscisic acid responsiveness							ABRE
MsLAC21	508	528	salicylic acid responsiveness							TCA-element
MsLAC21	1612	1632	salicylic acid responsiveness							TCA-element
MsLAC21	181	201	gibberellin-responsive element							P-box
MsLAC21	56	76	auxin responsiveness							AuxRR-core
MsLAC21	940	960	auxin-responsive element							TGA-element
MsLAC21	1178	1198	defense and stress responsiveness							TC-rich repeats
MsLAC21	1683	1703	defense and stress responsiveness							TC-rich repeats
MsLAC22	782	802	defense and stress responsiveness							TC-rich repeats
MsLAC22	1328	1348	defense and stress responsiveness							TC-rich repeats
MsLAC22	129	149	The MeJA-responsiveness							CGTCA-motif
MsLAC22	728	748	The MeJA-responsiveness							CGTCA-motif
MsLAC22	1577	1597	The MeJA-responsiveness							CGTCA-motif
MsLAC22	1829	1849	The abscisic acid responsiveness							ABRE
MsLAC22	129	149	The MeJA-responsiveness							TGACG-motif
MsLAC22	728	748	The MeJA-responsiveness							TGACG-motif
MsLAC22	1577	1597	The MeJA-responsiveness							TGACG-motif
MsLAC22	1823	1843	light responsive element							GT1-motif
MsLAC22	1824	1844	light responsive element							GT1-motif
MsLAC22	1426	1446	drought-inducibility							MBS
MsLAC22	731	751	MYBHv1 binding site							CCAAT-box
MsLAC22	1456	1476	MYBHv1 binding site							CCAAT-box
MsLAC23	490	510	The MeJA-responsiveness							TGACG-motif
MsLAC23	668	688	The MeJA-responsiveness							TGACG-motif
MsLAC23	490	510	The MeJA-responsiveness							CGTCA-motif
MsLAC23	668	688	The MeJA-responsiveness							CGTCA-motif
MsLAC23	1190	1210	drought-inducibility							MBS
MsLAC23	559	579	MYBHv1 binding site							CCAAT-box
MsLAC23	269	289	gibberellin-responsive element							GARE-motif
MsLAC24	668	688	drought-inducibility							MBS
MsLAC24	1149	1169	The MeJA-responsiveness							CGTCA-motif
MsLAC24	1624	1644	The MeJA-responsiveness							CGTCA-motif
MsLAC24	609	629	auxin-responsive element							TGA-element
MsLAC24	1775	1795	auxin-responsive element							TGA-element
MsLAC24	1661	1681	The abscisic acid responsiveness							ABRE
MsLAC24	1149	1169	The MeJA-responsiveness							TGACG-motif
MsLAC24	1624	1644	The MeJA-responsiveness							TGACG-motif
MsLAC25	1418	1438	The MeJA-responsiveness							CGTCA-motif
MsLAC25	132	152	auxin-responsive element							TGA-element
MsLAC25	389	409	auxin-responsive element							TGA-element
MsLAC25	1418	1438	The MeJA-responsiveness							TGACG-motif
MsLAC25	1166	1186	light responsive element							GT1-motif
MsLAC25	1770	1790	light responsive element							GT1-motif
MsLAC25	1237	1257	MYBHv1 binding site							CCAAT-box
MsLAC25	446	466	low-temperature responsiveness							LTR
MsLAC26	40	60	The abscisic acid responsiveness							ABRE
MsLAC26	1201	1221	salicylic acid responsiveness							TCA-element
MsLAC26	209	229	defense and stress responsiveness							TC-rich repeats
MsLAC26	245	265	defense and stress responsiveness							TC-rich repeats
MsLAC26	216	236	Light responsiveness							MRE
MsLAC26	383	403	Light responsiveness							MRE
MsLAC26	449	469	Light responsiveness							MRE
MsLAC26	564	584	Light responsiveness							MRE
MsLAC26	1610	1630	drought-inducibility							MBS
MsLAC26	1658	1678	light responsive element							GT1-motif
MsLAC26	1659	1679	light responsive element							GT1-motif
MsLAC27	543	563	light responsive element							GT1-motif
MsLAC27	544	564	light responsive element							GT1-motif
MsLAC27	798	818	light responsive element							GT1-motif
MsLAC27	1908	1928	gibberellin-responsive element							GARE-motif
MsLAC27	1680	1700	drought-inducibility							MBS
MsLAC27	310	330	Light responsiveness							MRE
MsLAC27	334	354	auxin responsiveness							AuxRR-core
MsLAC27	266	286	The abscisic acid responsiveness							ABRE
MsLAC27	281	301	The abscisic acid responsiveness							ABRE
MsLAC27	348	368	The abscisic acid responsiveness							ABRE
MsLAC27	1	21	salicylic acid responsiveness							TCA-element
MsLAC28	788	808	light responsive element							GT1-motif
MsLAC28	856	876	light responsive element							GT1-motif
MsLAC28	897	917	The MeJA-responsiveness							CGTCA-motif
MsLAC28	1242	1262	auxin responsiveness							AuxRR-core
MsLAC28	1559	1579	The abscisic acid responsiveness							ABRE
MsLAC28	897	917	The MeJA-responsiveness							TGACG-motif
MsLAC29	905	925	MYBHv1 binding site							CCAAT-box
MsLAC29	99	119	The abscisic acid responsiveness							ABRE
MsLAC29	1612	1632	The abscisic acid responsiveness							ABRE
MsLAC29	1613	1633	The abscisic acid responsiveness							ABRE
MsLAC29	699	719	Light responsiveness							MRE
MsLAC29	1107	1127	auxin-responsive element							TGA-element
MsLAC3	1117	1137	low-temperature responsiveness							LTR
MsLAC3	1229	1249	low-temperature responsiveness							LTR
MsLAC3	1785	1805	auxin-responsive element							TGA-element
MsLAC3	1406	1426	The abscisic acid responsiveness							ABRE
MsLAC3	1407	1427	The abscisic acid responsiveness							ABRE
MsLAC3	1435	1455	The abscisic acid responsiveness							ABRE
MsLAC3	1436	1456	The abscisic acid responsiveness							ABRE
MsLAC30	437	457	light responsive element							GT1-motif
MsLAC30	438	458	light responsive element							GT1-motif
MsLAC30	722	742	The abscisic acid responsiveness							ABRE
MsLAC30	1466	1486	The abscisic acid responsiveness							ABRE
MsLAC30	1494	1514	The abscisic acid responsiveness							ABRE
MsLAC31	620	640	light responsive element							GT1-motif
MsLAC31	1455	1475	light responsive element							GT1-motif
MsLAC31	237	257	gibberellin-responsive element							GARE-motif
MsLAC31	51	71	auxin responsiveness							AuxRR-core
MsLAC31	1243	1263	The abscisic acid responsiveness							ABRE
MsLAC31	1513	1533	The abscisic acid responsiveness							ABRE
MsLAC31	504	524	salicylic acid responsiveness							TCA-element
MsLAC31	1612	1632	salicylic acid responsiveness							TCA-element
MsLAC31	176	196	gibberellin-responsive element							P-box
MsLAC31	936	956	auxin-responsive element							TGA-element
MsLAC31	1174	1194	defense and stress responsiveness							TC-rich repeats
MsLAC31	1683	1703	defense and stress responsiveness							TC-rich repeats
MsLAC32	729	749	The MeJA-responsiveness							CGTCA-motif
MsLAC32	1577	1597	The MeJA-responsiveness							CGTCA-motif
MsLAC32	783	803	defense and stress responsiveness							TC-rich repeats
MsLAC32	1328	1348	defense and stress responsiveness							TC-rich repeats
MsLAC32	729	749	The MeJA-responsiveness							TGACG-motif
MsLAC32	1577	1597	The MeJA-responsiveness							TGACG-motif
MsLAC32	1829	1849	The abscisic acid responsiveness							ABRE
MsLAC32	1823	1843	light responsive element							GT1-motif
MsLAC32	1824	1844	light responsive element							GT1-motif
MsLAC32	1426	1446	drought-inducibility							MBS
MsLAC32	732	752	MYBHv1 binding site							CCAAT-box
MsLAC32	1456	1476	MYBHv1 binding site							CCAAT-box
MsLAC33	560	580	gibberellin-responsive element							P-box
MsLAC33	776	796	The MeJA-responsiveness							TGACG-motif
MsLAC33	192	212	The abscisic acid responsiveness							ABRE
MsLAC33	714	734	salicylic acid responsiveness							TCA-element
MsLAC33	530	550	auxin responsiveness							AuxRR-core
MsLAC33	776	796	The MeJA-responsiveness							CGTCA-motif
MsLAC33	56	76	MYBHv1 binding site							CCAAT-box
MsLAC33	137	157	MYBHv1 binding site							CCAAT-box
MsLAC33	147	167	light responsive element							GT1-motif
MsLAC34	11	31	The MeJA-responsiveness							TGACG-motif
MsLAC34	575	595	auxin-responsive element							TGA-element
MsLAC34	11	31	The MeJA-responsiveness							CGTCA-motif
MsLAC34	80	100	MYBHv1 binding site							CCAAT-box
MsLAC35	50	70	defense and stress responsiveness							TC-rich repeats
MsLAC35	1856	1876	The MeJA-responsiveness							CGTCA-motif
MsLAC35	811	831	auxin-responsive element							TGA-element
MsLAC35	1893	1913	The abscisic acid responsiveness							ABRE
MsLAC35	1856	1876	The MeJA-responsiveness							TGACG-motif
MsLAC35	871	891	drought-inducibility							MBS
MsLAC36	1470	1490	auxin-responsive element							TGA-element
MsLAC36	618	638	light responsive element							GT1-motif
MsLAC36	1196	1216	light responsive element							GT1-motif
MsLAC36	1728	1748	light responsive element							GT1-motif
MsLAC36	1729	1749	light responsive element							GT1-motif
MsLAC36	1768	1788	light responsive element							GT1-motif
MsLAC36	689	709	MYBHv1 binding site							CCAAT-box
MsLAC37	1317	1337	Light responsiveness							MRE
MsLAC37	71	91	auxin-responsive element							TGA-element
MsLAC37	202	222	The abscisic acid responsiveness							ABRE
MsLAC37	1650	1670	light responsive element							GT1-motif
MsLAC37	1651	1671	light responsive element							GT1-motif
MsLAC37	1602	1622	drought-inducibility							MBS
MsLAC38	812	832	auxin-responsive element							TGA-element
MsLAC38	1628	1648	wound-responsive element							WUN-motif
MsLAC38	748	768	gibberellin-responsive element							P-box
MsLAC38	709	729	The abscisic acid responsiveness							ABRE
MsLAC38	1017	1037	light responsive element							GT1-motif
MsLAC38	279	299	drought-inducibility							MBS
MsLAC38	689	709	drought-inducibility							MBS
MsLAC38	988	1008	drought-inducibility							MBS
MsLAC39	581	601	light responsive element							GT1-motif
MsLAC39	789	809	light responsive element							GT1-motif
MsLAC39	855	875	light responsive element							GT1-motif
MsLAC39	491	511	Light responsiveness							MRE
MsLAC39	1558	1578	The abscisic acid responsiveness							ABRE
MsLAC39	1242	1262	auxin responsiveness							AuxRR-core
MsLAC4	482	502	The MeJA-responsiveness							TGACG-motif
MsLAC4	1548	1568	The MeJA-responsiveness							TGACG-motif
MsLAC4	295	315	defense and stress responsiveness							TC-rich repeats
MsLAC4	325	345	defense and stress responsiveness							TC-rich repeats
MsLAC4	812	832	auxin-responsive element							TGA-element
MsLAC4	482	502	The MeJA-responsiveness							CGTCA-motif
MsLAC4	1548	1568	The MeJA-responsiveness							CGTCA-motif
MsLAC4	203	223	MYBHv1 binding site							CCAAT-box
MsLAC4	100	120	drought-inducibility							MBS
MsLAC4	1825	1845	light responsive element							GT1-motif
MsLAC40	110	130	The MeJA-responsiveness							TGACG-motif
MsLAC40	318	338	The abscisic acid responsiveness							ABRE
MsLAC40	1629	1649	The abscisic acid responsiveness							ABRE
MsLAC40	1630	1650	The abscisic acid responsiveness							ABRE
MsLAC40	110	130	The MeJA-responsiveness							CGTCA-motif
MsLAC40	794	814	Light responsiveness							MRE
MsLAC40	1162	1182	auxin-responsive element							TGA-element
MsLAC40	1883	1903	auxin-responsive element							TGA-element
MsLAC40	982	1002	MYBHv1 binding site							CCAAT-box
MsLAC41	445	465	light responsive element							GT1-motif
MsLAC41	446	466	light responsive element							GT1-motif
MsLAC41	972	992	MYBHv1 binding site							CCAAT-box
MsLAC41	726	746	The abscisic acid responsiveness							ABRE
MsLAC41	1466	1486	The abscisic acid responsiveness							ABRE
MsLAC41	1494	1514	The abscisic acid responsiveness							ABRE
MsLAC42	242	262	gibberellin-responsive element							GARE-motif
MsLAC42	624	644	light responsive element							GT1-motif
MsLAC42	940	960	auxin-responsive element							TGA-element
MsLAC42	1178	1198	defense and stress responsiveness							TC-rich repeats
MsLAC42	1683	1703	defense and stress responsiveness							TC-rich repeats
MsLAC42	508	528	salicylic acid responsiveness							TCA-element
MsLAC42	1612	1632	salicylic acid responsiveness							TCA-element
MsLAC42	1247	1267	The abscisic acid responsiveness							ABRE
MsLAC42	1513	1533	The abscisic acid responsiveness							ABRE
MsLAC42	181	201	gibberellin-responsive element							P-box
MsLAC42	56	76	auxin responsiveness							AuxRR-core
MsLAC43	1823	1843	light responsive element							GT1-motif
MsLAC43	1824	1844	light responsive element							GT1-motif
MsLAC43	1426	1446	drought-inducibility							MBS
MsLAC43	732	752	MYBHv1 binding site							CCAAT-box
MsLAC43	1456	1476	MYBHv1 binding site							CCAAT-box
MsLAC43	783	803	defense and stress responsiveness							TC-rich repeats
MsLAC43	1328	1348	defense and stress responsiveness							TC-rich repeats
MsLAC43	130	150	The MeJA-responsiveness							CGTCA-motif
MsLAC43	729	749	The MeJA-responsiveness							CGTCA-motif
MsLAC43	1577	1597	The MeJA-responsiveness							CGTCA-motif
MsLAC43	1829	1849	The abscisic acid responsiveness							ABRE
MsLAC43	130	150	The MeJA-responsiveness							TGACG-motif
MsLAC43	729	749	The MeJA-responsiveness							TGACG-motif
MsLAC43	1577	1597	The MeJA-responsiveness							TGACG-motif
MsLAC44	530	550	auxin responsiveness							AuxRR-core
MsLAC44	714	734	salicylic acid responsiveness							TCA-element
MsLAC44	192	212	The abscisic acid responsiveness							ABRE
MsLAC44	776	796	The MeJA-responsiveness							TGACG-motif
MsLAC44	560	580	gibberellin-responsive element							P-box
MsLAC44	776	796	The MeJA-responsiveness							CGTCA-motif
MsLAC44	56	76	MYBHv1 binding site							CCAAT-box
MsLAC44	137	157	MYBHv1 binding site							CCAAT-box
MsLAC44	376	396	drought-inducibility							MBS
MsLAC44	147	167	light responsive element							GT1-motif
MsLAC45	485	505	The MeJA-responsiveness							CGTCA-motif
MsLAC45	663	683	The MeJA-responsiveness							CGTCA-motif
MsLAC45	485	505	The MeJA-responsiveness							TGACG-motif
MsLAC45	663	683	The MeJA-responsiveness							TGACG-motif
MsLAC45	264	284	gibberellin-responsive element							GARE-motif
MsLAC45	554	574	MYBHv1 binding site							CCAAT-box
MsLAC46	871	891	drought-inducibility							MBS
MsLAC46	1893	1913	The abscisic acid responsiveness							ABRE
MsLAC46	1352	1372	The MeJA-responsiveness							TGACG-motif
MsLAC46	1856	1876	The MeJA-responsiveness							TGACG-motif
MsLAC46	51	71	defense and stress responsiveness							TC-rich repeats
MsLAC46	812	832	auxin-responsive element							TGA-element
MsLAC46	1352	1372	The MeJA-responsiveness							CGTCA-motif
MsLAC46	1856	1876	The MeJA-responsiveness							CGTCA-motif
MsLAC47	580	600	light responsive element							GT1-motif
MsLAC47	1179	1199	light responsive element							GT1-motif
MsLAC47	651	671	MYBHv1 binding site							CCAAT-box
MsLAC47	1405	1425	salicylic acid responsiveness							TCA-element
MsLAC48	1600	1620	drought-inducibility							MBS
MsLAC48	1648	1668	light responsive element							GT1-motif
MsLAC48	1649	1669	light responsive element							GT1-motif
MsLAC48	201	221	The abscisic acid responsiveness							ABRE
MsLAC48	70	90	auxin-responsive element							TGA-element
MsLAC48	1316	1336	Light responsiveness							MRE
MsLAC49	155	175	low-temperature responsiveness							LTR
MsLAC49	1667	1687	drought-inducibility							MBS
MsLAC49	11	31	light responsive element							GT1-motif
MsLAC49	723	743	light responsive element							GT1-motif
MsLAC49	724	744	light responsive element							GT1-motif
MsLAC49	445	465	The abscisic acid responsiveness							ABRE
MsLAC49	460	480	The abscisic acid responsiveness							ABRE
MsLAC49	527	547	The abscisic acid responsiveness							ABRE
MsLAC49	179	199	salicylic acid responsiveness							TCA-element
MsLAC49	489	509	Light responsiveness							MRE
MsLAC5	118	138	The abscisic acid responsiveness							ABRE
MsLAC5	119	139	The abscisic acid responsiveness							ABRE
MsLAC5	1390	1410	The abscisic acid responsiveness							ABRE
MsLAC5	92	112	salicylic acid responsiveness							TCA-element
MsLAC5	624	644	salicylic acid responsiveness							TCA-element
MsLAC5	1014	1034	salicylic acid responsiveness							TCA-element
MsLAC5	732	752	gibberellin-responsive element							P-box
MsLAC5	267	287	Light responsiveness							MRE
MsLAC5	445	465	auxin-responsive element							TGA-element
MsLAC5	581	601	auxin-responsive element							TGA-element
MsLAC5	64	84	drought-inducibility							MBS
MsLAC5	466	486	drought-inducibility							MBS
MsLAC5	144	164	light responsive element							GT1-motif
MsLAC5	215	235	light responsive element							GT1-motif
MsLAC5	1722	1742	gibberellin-responsive element							GARE-motif
MsLAC50	897	917	The MeJA-responsiveness							CGTCA-motif
MsLAC50	897	917	The MeJA-responsiveness							TGACG-motif
MsLAC50	1560	1580	The abscisic acid responsiveness							ABRE
MsLAC50	1243	1263	auxin responsiveness							AuxRR-core
MsLAC50	785	805	light responsive element							GT1-motif
MsLAC50	856	876	light responsive element							GT1-motif
MsLAC51	286	306	low-temperature responsiveness							LTR
MsLAC51	384	404	low-temperature responsiveness							LTR
MsLAC51	899	919	MYBHv1 binding site							CCAAT-box
MsLAC51	272	292	drought-inducibility							MBS
MsLAC51	689	709	Light responsiveness							MRE
MsLAC51	1101	1121	auxin-responsive element							TGA-element
MsLAC51	94	114	The abscisic acid responsiveness							ABRE
MsLAC51	1604	1624	The abscisic acid responsiveness							ABRE
MsLAC51	1605	1625	The abscisic acid responsiveness							ABRE
MsLAC52	966	986	MYBHv1 binding site							CCAAT-box
MsLAC52	420	440	light responsive element							GT1-motif
MsLAC52	421	441	light responsive element							GT1-motif
MsLAC52	705	725	The abscisic acid responsiveness							ABRE
MsLAC52	1466	1486	The abscisic acid responsiveness							ABRE
MsLAC52	1494	1514	The abscisic acid responsiveness							ABRE
MsLAC53	234	254	gibberellin-responsive element							GARE-motif
MsLAC53	624	644	light responsive element							GT1-motif
MsLAC53	1178	1198	defense and stress responsiveness							TC-rich repeats
MsLAC53	1683	1703	defense and stress responsiveness							TC-rich repeats
MsLAC53	940	960	auxin-responsive element							TGA-element
MsLAC53	173	193	gibberellin-responsive element							P-box
MsLAC53	500	520	salicylic acid responsiveness							TCA-element
MsLAC53	1612	1632	salicylic acid responsiveness							TCA-element
MsLAC53	1247	1267	The abscisic acid responsiveness							ABRE
MsLAC53	1513	1533	The abscisic acid responsiveness							ABRE
MsLAC53	47	67	auxin responsiveness							AuxRR-core
MsLAC54	546	566	drought-inducibility							MBS
MsLAC54	1905	1925	drought-inducibility							MBS
MsLAC54	576	596	MYBHv1 binding site							CCAAT-box
MsLAC54	943	963	light responsive element							GT1-motif
MsLAC54	944	964	light responsive element							GT1-motif
MsLAC54	949	969	The abscisic acid responsiveness							ABRE
MsLAC54	1897	1917	The abscisic acid responsiveness							ABRE
MsLAC54	698	718	auxin-responsive element							TGA-element
MsLAC54	467	487	defense and stress responsiveness							TC-rich repeats
MsLAC55	147	167	light responsive element							GT1-motif
MsLAC55	56	76	MYBHv1 binding site							CCAAT-box
MsLAC55	137	157	MYBHv1 binding site							CCAAT-box
MsLAC55	776	796	The MeJA-responsiveness							CGTCA-motif
MsLAC55	1571	1591	The MeJA-responsiveness							CGTCA-motif
MsLAC55	530	550	auxin responsiveness							AuxRR-core
MsLAC55	776	796	The MeJA-responsiveness							TGACG-motif
MsLAC55	1571	1591	The MeJA-responsiveness							TGACG-motif
MsLAC55	714	734	salicylic acid responsiveness							TCA-element
MsLAC55	192	212	The abscisic acid responsiveness							ABRE
MsLAC55	560	580	gibberellin-responsive element							P-box
MsLAC56	483	503	The MeJA-responsiveness							CGTCA-motif
MsLAC56	661	681	The MeJA-responsiveness							CGTCA-motif
MsLAC56	483	503	The MeJA-responsiveness							TGACG-motif
MsLAC56	661	681	The MeJA-responsiveness							TGACG-motif
MsLAC56	262	282	gibberellin-responsive element							GARE-motif
MsLAC56	552	572	MYBHv1 binding site							CCAAT-box
MsLAC57	869	889	drought-inducibility							MBS
MsLAC57	620	640	The MeJA-responsiveness							TGACG-motif
MsLAC57	1856	1876	The MeJA-responsiveness							TGACG-motif
MsLAC57	1893	1913	The abscisic acid responsiveness							ABRE
MsLAC57	620	640	The MeJA-responsiveness							CGTCA-motif
MsLAC57	1856	1876	The MeJA-responsiveness							CGTCA-motif
MsLAC57	54	74	defense and stress responsiveness							TC-rich repeats
MsLAC57	900	920	defense and stress responsiveness							TC-rich repeats
MsLAC58	1008	1028	defense and stress responsiveness							TC-rich repeats
MsLAC58	831	851	salicylic acid responsiveness							TCA-element
MsLAC58	1410	1430	salicylic acid responsiveness							TCA-element
MsLAC59	326	346	auxin-responsive element							TGA-element
MsLAC59	1610	1630	drought-inducibility							MBS
MsLAC59	1658	1678	light responsive element							GT1-motif
MsLAC59	1659	1679	light responsive element							GT1-motif
MsLAC6	1980	2000	drought-inducibility							MBS
MsLAC6	1077	1097	low-temperature responsiveness							LTR
MsLAC6	1191	1211	low-temperature responsiveness							LTR
MsLAC6	1368	1388	The abscisic acid responsiveness							ABRE
MsLAC6	1369	1389	The abscisic acid responsiveness							ABRE
MsLAC6	1397	1417	The abscisic acid responsiveness							ABRE
MsLAC6	1398	1418	The abscisic acid responsiveness							ABRE
MsLAC6	1678	1698	auxin-responsive element							TGA-element
MsLAC60	604	624	gibberellin-responsive element							P-box
MsLAC60	212	232	The abscisic acid responsiveness							ABRE
MsLAC60	560	580	The abscisic acid responsiveness							ABRE
MsLAC60	562	582	The abscisic acid responsiveness							ABRE
MsLAC60	563	583	The abscisic acid responsiveness							ABRE
MsLAC60	574	594	The abscisic acid responsiveness							ABRE
MsLAC61	102	122	The MeJA-responsiveness							TGACG-motif
MsLAC61	532	552	The MeJA-responsiveness							TGACG-motif
MsLAC61	1509	1529	The MeJA-responsiveness							TGACG-motif
MsLAC61	102	122	The MeJA-responsiveness							CGTCA-motif
MsLAC61	532	552	The MeJA-responsiveness							CGTCA-motif
MsLAC61	1509	1529	The MeJA-responsiveness							CGTCA-motif
MsLAC61	244	264	MYBHv1 binding site							CCAAT-box
MsLAC61	1468	1488	MYBHv1 binding site							CCAAT-box
MsLAC61	665	685	light responsive element							GT1-motif
MsLAC62	1511	1531	MYBHv1 binding site							CCAAT-box
MsLAC62	1572	1592	low-temperature responsiveness							LTR
MsLAC62	1775	1795	light responsive element							GT1-motif
MsLAC62	1785	1805	light responsive element							GT1-motif
MsLAC62	1786	1806	light responsive element							GT1-motif
MsLAC62	1518	1538	part of an auxin-responsive element							TGA-box
MsLAC62	171	191	The abscisic acid responsiveness							ABRE
MsLAC62	1377	1397	The abscisic acid responsiveness							ABRE
MsLAC62	1521	1541	The MeJA-responsiveness							TGACG-motif
MsLAC62	1521	1541	The MeJA-responsiveness							CGTCA-motif
MsLAC63	1868	1888	light responsive element							GT1-motif
MsLAC63	1224	1244	drought-inducibility							MBS
MsLAC63	449	469	low-temperature responsiveness							LTR
MsLAC63	495	515	low-temperature responsiveness							LTR
MsLAC63	961	981	defense and stress responsiveness							TC-rich repeats
MsLAC63	1840	1860	defense and stress responsiveness							TC-rich repeats
MsLAC63	661	681	Light responsiveness							MRE
MsLAC63	1021	1041	salicylic acid responsiveness							TCA-element
MsLAC64	135	155	gibberellin-responsive element							P-box
MsLAC64	953	973	The abscisic acid responsiveness							ABRE
MsLAC64	1382	1402	The abscisic acid responsiveness							ABRE
MsLAC64	1366	1386	defense and stress responsiveness							TC-rich repeats
MsLAC64	618	638	drought-inducibility							MBS
MsLAC64	1810	1830	drought-inducibility							MBS
MsLAC64	1377	1397	gibberellin-responsiveness							TATC-box
MsLAC64	635	655	light responsive element							GT1-motif
MsLAC64	1002	1022	light responsive element							GT1-motif
MsLAC64	1699	1719	light responsive element							GT1-motif
MsLAC64	1827	1847	light responsive element							GT1-motif
MsLAC65	1541	1561	The MeJA-responsiveness							TGACG-motif
MsLAC65	1541	1561	The MeJA-responsiveness							CGTCA-motif
MsLAC65	12	32	low-temperature responsiveness							LTR
MsLAC66	51	71	The MeJA-responsiveness							CGTCA-motif
MsLAC66	826	846	Light responsiveness							MRE
MsLAC66	1516	1536	Light responsiveness							MRE
MsLAC66	1548	1568	Light responsiveness							MRE
MsLAC66	560	580	The abscisic acid responsiveness							ABRE
MsLAC66	1169	1189	The abscisic acid responsiveness							ABRE
MsLAC66	1328	1348	The abscisic acid responsiveness							ABRE
MsLAC66	1682	1702	The abscisic acid responsiveness							ABRE
MsLAC66	1765	1785	The abscisic acid responsiveness							ABRE
MsLAC66	51	71	The MeJA-responsiveness							TGACG-motif
MsLAC66	1514	1534	light responsive element							GT1-motif
MsLAC67	665	685	light responsive element							GT1-motif
MsLAC67	1653	1673	light responsive element							GT1-motif
MsLAC67	51	71	The MeJA-responsiveness							TGACG-motif
MsLAC67	945	965	The abscisic acid responsiveness							ABRE
MsLAC67	947	967	The abscisic acid responsiveness							ABRE
MsLAC67	948	968	The abscisic acid responsiveness							ABRE
MsLAC67	1262	1282	The abscisic acid responsiveness							ABRE
MsLAC67	1264	1284	The abscisic acid responsiveness							ABRE
MsLAC67	1372	1392	The abscisic acid responsiveness							ABRE
MsLAC67	1374	1394	The abscisic acid responsiveness							ABRE
MsLAC67	1511	1531	salicylic acid responsiveness							TCA-element
MsLAC67	1023	1043	gibberellin-responsive element							P-box
MsLAC67	1850	1870	gibberellin-responsive element							P-box
MsLAC67	1249	1269	auxin-responsive element							TGA-element
MsLAC67	1359	1379	auxin-responsive element							TGA-element
MsLAC67	51	71	The MeJA-responsiveness							CGTCA-motif
MsLAC68	1443	1463	salicylic acid responsiveness							TCA-element
MsLAC68	1383	1403	The abscisic acid responsiveness							ABRE
MsLAC68	1423	1443	The abscisic acid responsiveness							ABRE
MsLAC68	1489	1509	low-temperature responsiveness							LTR
MsLAC68	1367	1387	light responsive element							GT1-motif
MsLAC68	1368	1388	light responsive element							GT1-motif
MsLAC69	204	224	light responsive element							GT1-motif
MsLAC69	1144	1164	light responsive element							GT1-motif
MsLAC69	1198	1218	light responsive element							GT1-motif
MsLAC69	1199	1219	light responsive element							GT1-motif
MsLAC69	1655	1675	light responsive element							GT1-motif
MsLAC69	1656	1676	light responsive element							GT1-motif
MsLAC69	1686	1706	light responsive element							GT1-motif
MsLAC69	537	557	defense and stress responsiveness							TC-rich repeats
MsLAC69	1113	1133	Light responsiveness							MRE
MsLAC69	1201	1221	Light responsiveness							MRE
MsLAC69	1861	1881	auxin-responsive element							TGA-element
MsLAC69	1865	1885	The abscisic acid responsiveness							ABRE
MsLAC7	655	675	The abscisic acid responsiveness							ABRE
MsLAC7	502	522	The MeJA-responsiveness							TGACG-motif
MsLAC7	1550	1570	The MeJA-responsiveness							TGACG-motif
MsLAC7	314	334	defense and stress responsiveness							TC-rich repeats
MsLAC7	344	364	defense and stress responsiveness							TC-rich repeats
MsLAC7	502	522	The MeJA-responsiveness							CGTCA-motif
MsLAC7	1550	1570	The MeJA-responsiveness							CGTCA-motif
MsLAC7	816	836	auxin-responsive element							TGA-element
MsLAC7	222	242	MYBHv1 binding site							CCAAT-box
MsLAC7	119	139	drought-inducibility							MBS
MsLAC7	713	733	light responsive element							GT1-motif
MsLAC7	1825	1845	light responsive element							GT1-motif
MsLAC70	211	231	The MeJA-responsiveness							CGTCA-motif
MsLAC70	1194	1214	The MeJA-responsiveness							CGTCA-motif
MsLAC70	348	368	The abscisic acid responsiveness							ABRE
MsLAC70	373	393	The abscisic acid responsiveness							ABRE
MsLAC70	211	231	The MeJA-responsiveness							TGACG-motif
MsLAC70	1194	1214	The MeJA-responsiveness							TGACG-motif
MsLAC71	667	687	light responsive element							GT1-motif
MsLAC71	869	889	light responsive element							GT1-motif
MsLAC71	246	266	MYBHv1 binding site							CCAAT-box
MsLAC71	1468	1488	MYBHv1 binding site							CCAAT-box
MsLAC71	104	124	The MeJA-responsiveness							CGTCA-motif
MsLAC71	534	554	The MeJA-responsiveness							CGTCA-motif
MsLAC71	104	124	The MeJA-responsiveness							TGACG-motif
MsLAC71	534	554	The MeJA-responsiveness							TGACG-motif
MsLAC72	1521	1541	The MeJA-responsiveness							CGTCA-motif
MsLAC72	1521	1541	The MeJA-responsiveness							TGACG-motif
MsLAC72	613	633	The abscisic acid responsiveness							ABRE
MsLAC72	1211	1231	The abscisic acid responsiveness							ABRE
MsLAC72	1518	1538	part of an auxin-responsive element							TGA-box
MsLAC72	17	37	gibberellin-responsive element							P-box
MsLAC72	1775	1795	light responsive element							GT1-motif
MsLAC72	1785	1805	light responsive element							GT1-motif
MsLAC72	1786	1806	light responsive element							GT1-motif
MsLAC72	1572	1592	low-temperature responsiveness							LTR
MsLAC72	252	272	drought-inducibility							MBS
MsLAC73	964	984	defense and stress responsiveness							TC-rich repeats
MsLAC73	1840	1860	defense and stress responsiveness							TC-rich repeats
MsLAC73	665	685	Light responsiveness							MRE
MsLAC73	1024	1044	salicylic acid responsiveness							TCA-element
MsLAC73	1868	1888	light responsive element							GT1-motif
MsLAC73	1225	1245	drought-inducibility							MBS
MsLAC73	453	473	low-temperature responsiveness							LTR
MsLAC73	499	519	low-temperature responsiveness							LTR
MsLAC74	135	155	gibberellin-responsive element							P-box
MsLAC74	505	525	part of an auxin-responsive element							TGA-box
MsLAC74	178	198	The MeJA-responsiveness							TGACG-motif
MsLAC74	505	525	The MeJA-responsiveness							TGACG-motif
MsLAC74	614	634	The MeJA-responsiveness							TGACG-motif
MsLAC74	1545	1565	The MeJA-responsiveness							TGACG-motif
MsLAC74	48	68	The abscisic acid responsiveness							ABRE
MsLAC74	65	85	The abscisic acid responsiveness							ABRE
MsLAC74	78	98	The abscisic acid responsiveness							ABRE
MsLAC74	96	116	The abscisic acid responsiveness							ABRE
MsLAC74	117	137	The abscisic acid responsiveness							ABRE
MsLAC74	118	138	The abscisic acid responsiveness							ABRE
MsLAC74	178	198	The MeJA-responsiveness							CGTCA-motif
MsLAC74	505	525	The MeJA-responsiveness							CGTCA-motif
MsLAC74	614	634	The MeJA-responsiveness							CGTCA-motif
MsLAC74	1545	1565	The MeJA-responsiveness							CGTCA-motif
MsLAC75	1377	1397	gibberellin-responsiveness							TATC-box
MsLAC75	618	638	drought-inducibility							MBS
MsLAC75	1810	1830	drought-inducibility							MBS
MsLAC75	635	655	light responsive element							GT1-motif
MsLAC75	1002	1022	light responsive element							GT1-motif
MsLAC75	1699	1719	light responsive element							GT1-motif
MsLAC75	1827	1847	light responsive element							GT1-motif
MsLAC75	953	973	The abscisic acid responsiveness							ABRE
MsLAC75	1382	1402	The abscisic acid responsiveness							ABRE
MsLAC75	135	155	gibberellin-responsive element							P-box
MsLAC75	1366	1386	defense and stress responsiveness							TC-rich repeats
MsLAC76	1177	1197	light responsive element							GT1-motif
MsLAC76	1742	1762	light responsive element							GT1-motif
MsLAC76	1907	1927	defense and stress responsiveness							TC-rich repeats
MsLAC76	488	508	Light responsiveness							MRE
MsLAC76	1179	1199	Light responsiveness							MRE
MsLAC76	221	241	The abscisic acid responsiveness							ABRE
MsLAC76	832	852	The abscisic acid responsiveness							ABRE
MsLAC76	991	1011	The abscisic acid responsiveness							ABRE
MsLAC76	1345	1365	The abscisic acid responsiveness							ABRE
MsLAC76	1428	1448	The abscisic acid responsiveness							ABRE
MsLAC77	1474	1494	salicylic acid responsiveness							TCA-element
MsLAC77	1414	1434	The abscisic acid responsiveness							ABRE
MsLAC77	1454	1474	The abscisic acid responsiveness							ABRE
MsLAC77	1398	1418	light responsive element							GT1-motif
MsLAC77	1399	1419	light responsive element							GT1-motif
MsLAC77	1520	1540	low-temperature responsiveness							LTR
MsLAC78	395	415	light responsive element							GT1-motif
MsLAC78	451	471	light responsive element							GT1-motif
MsLAC78	452	472	light responsive element							GT1-motif
MsLAC78	1615	1635	light responsive element							GT1-motif
MsLAC78	1690	1710	light responsive element							GT1-motif
MsLAC78	1169	1189	The abscisic acid responsiveness							ABRE
MsLAC78	1170	1190	The abscisic acid responsiveness							ABRE
MsLAC78	1869	1889	The abscisic acid responsiveness							ABRE
MsLAC78	364	384	Light responsiveness							MRE
MsLAC78	454	474	Light responsiveness							MRE
MsLAC78	1865	1885	auxin-responsive element							TGA-element
MsLAC79	970	990	The abscisic acid responsiveness							ABRE
MsLAC79	972	992	The abscisic acid responsiveness							ABRE
MsLAC79	973	993	The abscisic acid responsiveness							ABRE
MsLAC79	984	1004	The abscisic acid responsiveness							ABRE
MsLAC79	1014	1034	gibberellin-responsive element							P-box
MsLAC8	1722	1742	gibberellin-responsive element							GARE-motif
MsLAC8	108	128	light responsive element							GT1-motif
MsLAC8	179	199	light responsive element							GT1-motif
MsLAC8	28	48	drought-inducibility							MBS
MsLAC8	430	450	drought-inducibility							MBS
MsLAC8	231	251	Light responsiveness							MRE
MsLAC8	409	429	auxin-responsive element							TGA-element
MsLAC8	544	564	auxin-responsive element							TGA-element
MsLAC8	56	76	salicylic acid responsiveness							TCA-element
MsLAC8	587	607	salicylic acid responsiveness							TCA-element
MsLAC8	978	998	salicylic acid responsiveness							TCA-element
MsLAC8	82	102	The abscisic acid responsiveness							ABRE
MsLAC8	83	103	The abscisic acid responsiveness							ABRE
MsLAC8	1354	1374	The abscisic acid responsiveness							ABRE
MsLAC8	695	715	gibberellin-responsive element							P-box
MsLAC80	1015	1035	gibberellin-responsive element							P-box
MsLAC80	971	991	The abscisic acid responsiveness							ABRE
MsLAC80	973	993	The abscisic acid responsiveness							ABRE
MsLAC80	974	994	The abscisic acid responsiveness							ABRE
MsLAC80	985	1005	The abscisic acid responsiveness							ABRE
MsLAC81	604	624	gibberellin-responsive element							P-box
MsLAC81	560	580	The abscisic acid responsiveness							ABRE
MsLAC81	562	582	The abscisic acid responsiveness							ABRE
MsLAC81	563	583	The abscisic acid responsiveness							ABRE
MsLAC81	574	594	The abscisic acid responsiveness							ABRE
MsLAC82	861	881	The abscisic acid responsiveness							ABRE
MsLAC82	863	883	The abscisic acid responsiveness							ABRE
MsLAC82	864	884	The abscisic acid responsiveness							ABRE
MsLAC82	875	895	The abscisic acid responsiveness							ABRE
MsLAC82	905	925	gibberellin-responsive element							P-box
MsLAC83	1510	1530	light responsive element							GT1-motif
MsLAC83	556	576	The abscisic acid responsiveness							ABRE
MsLAC83	1165	1185	The abscisic acid responsiveness							ABRE
MsLAC83	1324	1344	The abscisic acid responsiveness							ABRE
MsLAC83	1682	1702	The abscisic acid responsiveness							ABRE
MsLAC83	1765	1785	The abscisic acid responsiveness							ABRE
MsLAC83	47	67	The MeJA-responsiveness							TGACG-motif
MsLAC83	822	842	Light responsiveness							MRE
MsLAC83	1512	1532	Light responsiveness							MRE
MsLAC83	1548	1568	Light responsiveness							MRE
MsLAC83	47	67	The MeJA-responsiveness							CGTCA-motif
MsLAC84	294	314	light responsive element							GT1-motif
MsLAC84	315	335	light responsive element							GT1-motif
MsLAC84	1629	1649	light responsive element							GT1-motif
MsLAC84	387	407	drought-inducibility							MBS
MsLAC84	1225	1245	MYBHv1 binding site							CCAAT-box
MsLAC84	208	228	auxin-responsive element							TGA-element
MsLAC84	189	209	salicylic acid responsiveness							TCA-element
MsLAC84	256	276	gibberellin-responsive element							P-box
MsLAC84	1029	1049	gibberellin-responsive element							P-box
MsLAC84	1853	1873	gibberellin-responsive element							P-box
MsLAC85	1491	1511	low-temperature responsiveness							LTR
MsLAC85	1369	1389	light responsive element							GT1-motif
MsLAC85	1370	1390	light responsive element							GT1-motif
MsLAC85	1445	1465	salicylic acid responsiveness							TCA-element
MsLAC85	1385	1405	The abscisic acid responsiveness							ABRE
MsLAC85	1425	1445	The abscisic acid responsiveness							ABRE
MsLAC86	1169	1189	The abscisic acid responsiveness							ABRE
MsLAC86	1170	1190	The abscisic acid responsiveness							ABRE
MsLAC86	1869	1889	The abscisic acid responsiveness							ABRE
MsLAC86	1865	1885	auxin-responsive element							TGA-element
MsLAC86	361	381	Light responsiveness							MRE
MsLAC86	451	471	Light responsiveness							MRE
MsLAC86	392	412	light responsive element							GT1-motif
MsLAC86	448	468	light responsive element							GT1-motif
MsLAC86	449	469	light responsive element							GT1-motif
MsLAC86	1615	1635	light responsive element							GT1-motif
MsLAC86	1690	1710	light responsive element							GT1-motif
MsLAC87	629	649	The MeJA-responsiveness							TGACG-motif
MsLAC87	629	649	The MeJA-responsiveness							CGTCA-motif
MsLAC87	1156	1176	drought-inducibility							MBS
MsLAC87	1380	1400	drought-inducibility							MBS
MsLAC87	1640	1660	light responsive element							GT1-motif
MsLAC87	1832	1852	light responsive element							GT1-motif
MsLAC88	665	685	light responsive element							GT1-motif
MsLAC88	244	264	MYBHv1 binding site							CCAAT-box
MsLAC88	526	546	MYBHv1 binding site							CCAAT-box
MsLAC88	1468	1488	MYBHv1 binding site							CCAAT-box
MsLAC88	100	120	The MeJA-responsiveness							CGTCA-motif
MsLAC88	532	552	The MeJA-responsiveness							CGTCA-motif
MsLAC88	100	120	The MeJA-responsiveness							TGACG-motif
MsLAC88	532	552	The MeJA-responsiveness							TGACG-motif
MsLAC89	1775	1795	light responsive element							GT1-motif
MsLAC89	1785	1805	light responsive element							GT1-motif
MsLAC89	1786	1806	light responsive element							GT1-motif
MsLAC89	243	263	drought-inducibility							MBS
MsLAC89	1572	1592	low-temperature responsiveness							LTR
MsLAC89	1521	1541	The MeJA-responsiveness							CGTCA-motif
MsLAC89	1212	1232	The abscisic acid responsiveness							ABRE
MsLAC89	1521	1541	The MeJA-responsiveness							TGACG-motif
MsLAC89	8	28	gibberellin-responsive element							P-box
MsLAC89	1518	1538	part of an auxin-responsive element							TGA-box
MsLAC9	534	554	The MeJA-responsiveness							CGTCA-motif
MsLAC9	570	590	The MeJA-responsiveness							CGTCA-motif
MsLAC9	830	850	auxin-responsive element							TGA-element
MsLAC9	1548	1568	auxin-responsive element							TGA-element
MsLAC9	534	554	The MeJA-responsiveness							TGACG-motif
MsLAC9	570	590	The MeJA-responsiveness							TGACG-motif
MsLAC9	291	311	auxin responsiveness							AuxRR-core
MsLAC9	352	372	light responsive element							GT1-motif
MsLAC9	1824	1844	light responsive element							GT1-motif
MsLAC9	390	410	low-temperature responsiveness							LTR
MsLAC90	655	675	Light responsiveness							MRE
MsLAC90	955	975	defense and stress responsiveness							TC-rich repeats
MsLAC90	1840	1860	defense and stress responsiveness							TC-rich repeats
MsLAC90	1015	1035	salicylic acid responsiveness							TCA-element
MsLAC90	695	715	flavonoid biosynthetic genes regulation							MBSI
MsLAC90	1868	1888	light responsive element							GT1-motif
MsLAC90	443	463	low-temperature responsiveness							LTR
MsLAC90	489	509	low-temperature responsiveness							LTR
MsLAC90	1223	1243	drought-inducibility							MBS
MsLAC91	1545	1565	The MeJA-responsiveness							CGTCA-motif
MsLAC91	1545	1565	The MeJA-responsiveness							TGACG-motif
MsLAC91	28	48	gibberellin-responsiveness							TATC-box
MsLAC91	169	189	low-temperature responsiveness							LTR
MsLAC92	2	22	light responsive element							GT1-motif
MsLAC92	195	215	light responsive element							GT1-motif
MsLAC92	142	162	MYBHv1 binding site							CCAAT-box
MsLAC92	594	614	MYBHv1 binding site							CCAAT-box
MsLAC92	174	194	drought-inducibility							MBS
MsLAC92	1445	1465	drought-inducibility							MBS
MsLAC92	1575	1595	drought-inducibility							MBS
MsLAC92	1822	1842	The MeJA-responsiveness							CGTCA-motif
MsLAC92	530	550	defense and stress responsiveness							TC-rich repeats
MsLAC92	631	651	defense and stress responsiveness							TC-rich repeats
MsLAC92	1103	1123	gibberellin-responsive element							P-box
MsLAC92	1822	1842	The MeJA-responsiveness							TGACG-motif
MsLAC92	1820	1840	The abscisic acid responsiveness							ABRE
MsLAC93	1511	1531	light responsive element							GT1-motif
MsLAC93	48	68	The MeJA-responsiveness							CGTCA-motif
MsLAC93	823	843	Light responsiveness							MRE
MsLAC93	1513	1533	Light responsiveness							MRE
MsLAC93	1548	1568	Light responsiveness							MRE
MsLAC93	557	577	The abscisic acid responsiveness							ABRE
MsLAC93	1166	1186	The abscisic acid responsiveness							ABRE
MsLAC93	1325	1345	The abscisic acid responsiveness							ABRE
MsLAC93	1682	1702	The abscisic acid responsiveness							ABRE
MsLAC93	1765	1785	The abscisic acid responsiveness							ABRE
MsLAC93	48	68	The MeJA-responsiveness							TGACG-motif
MsLAC94	332	352	light responsive element							GT1-motif
MsLAC94	1319	1339	light responsive element							GT1-motif
MsLAC94	916	936	auxin-responsive element							TGA-element
MsLAC94	1026	1046	auxin-responsive element							TGA-element
MsLAC94	690	710	gibberellin-responsive element							P-box
MsLAC94	1499	1519	gibberellin-responsive element							P-box
MsLAC94	612	632	The abscisic acid responsiveness							ABRE
MsLAC94	614	634	The abscisic acid responsiveness							ABRE
MsLAC94	615	635	The abscisic acid responsiveness							ABRE
MsLAC94	929	949	The abscisic acid responsiveness							ABRE
MsLAC94	931	951	The abscisic acid responsiveness							ABRE
MsLAC94	1039	1059	The abscisic acid responsiveness							ABRE
MsLAC94	1041	1061	The abscisic acid responsiveness							ABRE
MsLAC94	1178	1198	salicylic acid responsiveness							TCA-element
MsLAC95	1072	1092	salicylic acid responsiveness							TCA-element
MsLAC95	1182	1202	salicylic acid responsiveness							TCA-element
MsLAC95	18	38	The abscisic acid responsiveness							ABRE
MsLAC95	1122	1142	The abscisic acid responsiveness							ABRE
MsLAC95	1162	1182	The abscisic acid responsiveness							ABRE
MsLAC95	1106	1126	light responsive element							GT1-motif
MsLAC95	1107	1127	light responsive element							GT1-motif
MsLAC95	1228	1248	low-temperature responsiveness							LTR
MsLAC96	397	417	light responsive element							GT1-motif
MsLAC96	398	418	light responsive element							GT1-motif
MsLAC96	1196	1216	light responsive element							GT1-motif
MsLAC96	1197	1217	light responsive element							GT1-motif
MsLAC96	1625	1645	light responsive element							GT1-motif
MsLAC96	1690	1710	light responsive element							GT1-motif
MsLAC96	202	222	defense and stress responsiveness							TC-rich repeats
MsLAC96	727	747	defense and stress responsiveness							TC-rich repeats
MsLAC96	209	229	Light responsiveness							MRE
MsLAC96	1112	1132	Light responsiveness							MRE
MsLAC96	1199	1219	Light responsiveness							MRE
MsLAC96	1865	1885	auxin-responsive element							TGA-element
MsLAC96	470	490	The MeJA-responsiveness							CGTCA-motif
MsLAC96	311	331	The abscisic acid responsiveness							ABRE
MsLAC96	1869	1889	The abscisic acid responsiveness							ABRE
MsLAC96	7	27	salicylic acid responsiveness							TCA-element
MsLAC96	470	490	The MeJA-responsiveness							TGACG-motif
MsLAC97	1505	1525	light responsive element							GT1-motif
MsLAC97	1539	1559	light responsive element							GT1-motif
MsLAC97	1541	1561	light responsive element							GT1-motif
MsLAC97	1761	1781	drought-inducibility							MBS
MsLAC97	317	337	low-temperature responsiveness							LTR
MsLAC97	1004	1024	low-temperature responsiveness							LTR
MsLAC97	1776	1796	gibberellin-responsiveness							TATC-box
MsLAC97	711	731	defense and stress responsiveness							TC-rich repeats
MsLAC97	59	79	Light responsiveness							MRE
MsLAC97	394	414	Light responsiveness							MRE
MsLAC97	1010	1030	auxin-responsive element							TGA-element
MsLAC97	1546	1566	gibberellin-responsive element							P-box
MsLAC97	586	606	The abscisic acid responsiveness							ABRE
MsLAC97	747	767	The abscisic acid responsiveness							ABRE
MsLAC97	948	968	The abscisic acid responsiveness							ABRE
MsLAC97	1610	1630	The abscisic acid responsiveness							ABRE
MsLAC97	1611	1631	The abscisic acid responsiveness							ABRE
MsLAC98	1410	1430	gibberellin-responsiveness							TATC-box
MsLAC98	748	768	drought-inducibility							MBS
MsLAC98	978	998	drought-inducibility							MBS
MsLAC98	59	79	The MeJA-responsiveness							TGACG-motif
MsLAC98	260	280	The MeJA-responsiveness							TGACG-motif
MsLAC98	507	527	The MeJA-responsiveness							TGACG-motif
MsLAC98	565	585	The MeJA-responsiveness							TGACG-motif
MsLAC98	198	218	The abscisic acid responsiveness							ABRE
MsLAC98	1248	1268	The abscisic acid responsiveness							ABRE
MsLAC98	59	79	The MeJA-responsiveness							CGTCA-motif
MsLAC98	260	280	The MeJA-responsiveness							CGTCA-motif
MsLAC98	507	527	The MeJA-responsiveness							CGTCA-motif
MsLAC98	565	585	The MeJA-responsiveness							CGTCA-motif
MsLAC98	973	993	auxin-responsive element							TGA-element
MsLAC99	1423	1443	auxin responsiveness							AuxRR-core
MsLAC99	188	208	The abscisic acid responsiveness							ABRE
MsLAC99	1006	1026	salicylic acid responsiveness							TCA-element
MsLAC99	1355	1375	defense and stress responsiveness							TC-rich repeats
MsLAC99	1608	1628	defense and stress responsiveness							TC-rich repeats
MsLAC99	349	369	gibberellin-responsiveness							TATC-box

## Sheet: 顺式作用热图
Table S4 heatmap data of functional elements
		Plant growth ang development					Abiotic and biotic stress						Phytohormone responsive
Gene ID	Gene ID	AuxRR-core	TGA-element	GT1-motif	MRE	TGA-box	TC-rich repeats	MBS	MBSI	LTR	CCAAT-box	WUN-motif	GARE-motif	P-box	TATC-box	TCA-element	ABRE	CGTCA-motif	TGACG-motif
MS.gene27107.t1	MsLAC1			1	1		1									2	7
MS.gene24091.t1	MsLAC2		2	2	1			2					1	1		3	3
MS.gene040767.t1	MsLAC3		1							2							4
MS.gene005761.t1	MsLAC4		1	1			2	1			1							2	2
MS.gene88938.t1	MsLAC5		2	2	1			2					1	1		3	3
MS.gene68428.t1	MsLAC6		1	2			2	1			1						1	2	2
MS.gene88984.t1	MsLAC7		2	2	1			2					1	1		3	3
MS.gene21407.t1	MsLAC8	1	2	2						1								2	2
MS.gene35833.t1	MsLAC9			2					1		1					3
MS.gene01142.t1	MsLAC10						1										1	2	2
MS.gene059311.t1	MsLAC11				1		1										1	1	1
MS.gene002173.t1	MsLAC12			1			1				2			1		1	3
MS.gene047086.t1	MsLAC13			1					1		2					3
MS.gene034345.t1	MsLAC14				1		1											1	1
MS.gene071950.t1	MsLAC15							1		1	3					2	3
MS.gene84361.t1	MsLAC16			3	1			1		2						1	3
MS.gene04575.t1	MsLAC17	1		5	1												1
MS.gene70576.t1	MsLAC18			2							1						3
MS.gene70575.t1	MsLAC19	1	1	1			2						1	1		2	2
MS.gene70574.t1	MsLAC20			2			2	1			2						1	3	3
MS.gene79849.t1	MsLAC21							1			1		1					2	2
MS.gene48502.t1	MsLAC22		2					1									1	2	2
MS.gene48504.t1	MsLAC23		2	2						1	1							1	1
MS.gene52790.t1	MsLAC24			2	4		2	1								1	1
MS.gene058407.t1	MsLAC25	1		3	1			1					1			1	3
MS.gene05606.t1	MsLAC26	1		2													1	1	1
MS.gene039999.t1	MsLAC27		1		1						1						3
MS.gene25900.t1	MsLAC28			2													3
MS.gene25899.t1	MsLAC29	1	1	2			2						1	1		2	2
MS.gene25898.t1	MsLAC30			2			2	1			2						1	2	2
MS.gene77483.t1	MsLAC31	1		1							2			1		1	1	1	1
MS.gene77484.t1	MsLAC32		1								1							1	1
MS.gene012985.t1	MsLAC33		1				1	1									1	1	1
MS.gene012984.t1	MsLAC34		1	5							1
MS.gene014367.t1	MsLAC35		1	2	1			1									1
MS.gene04051.t1	MsLAC36	1		3	1												1
MS.gene007998.t1	MsLAC37		2		1						1						3	1	1
MS.gene022247.t1	MsLAC38			2							1						3
MS.gene022246.t1	MsLAC39	1	1	1			2						1	1		2	2
MS.gene022245.t1	MsLAC40			2			2	1			2						1	3	3
MS.gene75721.t1	MsLAC41	1		1				1			2		1	1		1	1	1	1
MS.gene75720.t1	MsLAC42										1							2	2
MS.gene38718.t1	MsLAC43		1				1	1									1	2	2
MS.gene38717.t1	MsLAC44			2							1					1
MS.gene69347.t1	MsLAC45		1	2	1			1									1
MS.gene009433.t1	MsLAC46			3	1			1		1						1	3
MS.gene04460.t1	MsLAC47	1		2													1	1	1
MS.gene031917.t1	MsLAC48		1		1			1		2	1						3
MS.gene074403.t1	MsLAC49			2							1						3
MS.gene074404.t1	MsLAC50	1	1	1			2						1	1		2	2
MS.gene045406.t1	MsLAC51	1		1							2			1		1	1	2	2
MS.gene045405.t1	MsLAC52										1		1					2	2
MS.gene054639.t1	MsLAC53						2	1									1	2	2
MS.gene054640.t1	MsLAC54						1									2
MS.gene064814.t1	MsLAC55		1	2				1
MS.gene006862.t1	MsLAC56			1							2							3	3
MS.gene006860.t1	MsLAC57			3		1				1	1						2	1	1
MS.gene006859.t1	MsLAC58			1	1		2	1		2						1
MS.gene003390.t1	MsLAC59									1								1	1
MS.gene41139.t1	MsLAC60			1	3												4	1	1
MS.gene61580.t1	MsLAC61		2	2										2		1	7	1	1
MS.gene73256.t1	MsLAC62			2	2					1						1	2
MS.gene037429.t1	MsLAC63		1	7			1										1
MS.gene70354.t1	MsLAC64																2	2	2
MS.gene82393.t1	MsLAC65			2							2							2	2
MS.gene82389.t1	MsLAC66			3		1		1		1				1			2	1	1
MS.gene82388.t1	MsLAC67			1	1		2	1		2						1
MS.gene052289.t1	MsLAC68					1								1			6	4	4
MS.gene92589.t1	MsLAC69			4			1	2						1	1		2
MS.gene89907.t1	MsLAC70			2						2						1	2
MS.gene059697.t1	MsLAC71		1	5	2												3
MS.gene030765.t1	MsLAC72													1			4
MS.gene059690.t1	MsLAC73													1			4
MS.gene004011.t1	MsLAC74			1	3												5	1	1
MS.gene95576.t1	MsLAC75		1	3				1			1			3		1
MS.gene037658.t1	MsLAC76			2						1						1	2
MS.gene33479.t1	MsLAC77		1	5	2												3
MS.gene56463.t1	MsLAC78			1							3							2	2
MS.gene56466.t1	MsLAC79			3		1		1		1				1			1	1	1
MS.gene56467.t1	MsLAC80			1	1		2	1	1	2						1
MS.gene28940.t1	MsLAC81						2			1					1			1	1
MS.gene021147.t1	MsLAC82			1	3												5	1	1
MS.gene027389.t1	MsLAC83		2	2										2		1	7
MS.gene048082.t1	MsLAC84			2						1						2	3
MS.gene052753.t1	MsLAC85		1	6	3		2									1	2	1	1
MS.gene010528.t1	MsLAC86	1					2								1	1	1
MS.gene010533.t1	MsLAC87							2							1		2	4	4
MS.gene43755.t1	MsLAC88						1											2	2
MS.gene35871.t1	MsLAC89			4				1		1							3
MS.gene56689.t1	MsLAC90			1										1		1	1
MS.gene51086.t1	MsLAC91			4							1					1
MS.gene041141.t1	MsLAC92	1	1	3				1		1			1
MS.gene010526.t1	MsLAC93			1	4													4	4
MS.gene02463.t1	MsLAC94		1					2							1		2	4	4
MS.gene64676.t1	MsLAC95						1											2	2
MS.gene44858.t1	MsLAC96			3	1	1		1		1							1	2	2
MS.gene50248.t1	MsLAC97	1		2					1					1		1	2
MS.gene76101.t1	MsLAC98			1	2			1			1					1	1
MS.gene047683.t1	MsLAC99		1					2							1		2	3	3
MS.gene02442.t1	MsLAC100						1					1						1	1
MS.gene02440.t1	MsLAC101			3		1		1		1							1	2	2
MS.gene009922.t1	MsLAC102								1		1					1
MS.gene009762.t1	MsLAC103			1				1			1							2	2
MS.gene070066.t1	MsLAC104			1	4													3	3
MS.gene29699.t1	MsLAC105		1					2							1		3	5	5
MS.gene59385.t1	MsLAC106						1											2	2
MS.gene59387.t1	MsLAC107			2							1						2
MS.gene88734.t1	MsLAC108							1		1	1						1
MS.gene041990.t1	MsLAC109			3							1
MS.gene80645.t1	MsLAC110							1		1		1				1	1	1	1
MS.gene94205.t1	MsLAC111		1	3	2		1		1	1						2	1	1	1
MS.gene94790.t1	MsLAC112			1			1		1
MS.gene94791.t1	MsLAC113			3			1	2			1			1			1
MS.gene99610.t1	MsLAC114	1		4			2	1			2		1		1
MS.gene65188.t1	MsLAC115			1			1	3	1		1			1			3
MS.gene65111.t1	MsLAC116	1		1	1										1		2	1	1
MS.gene65109.t1	MsLAC117			3			1	2		1			2	1		1	4	2	2
MS.gene011006.t1	MsLAC118			1				1	1		2				1		3
MS.gene77227.t1	MsLAC119			1			1										4	1	1
MS.gene91701.t1	MsLAC120							3			1	1				1		1	1
MS.gene46170.t1	MsLAC121						1
MS.gene46161.t1	MsLAC122													2		1	2	2	2
MS.gene46028.t1	MsLAC123						1	2		1						1		1	1
MS.gene46027.t1	MsLAC124			3	2			2		1			1				4	1	1
MS.gene051251.t1	MsLAC125			3	2			1						1		1		2	2
MS.gene23169.t1	MsLAC126		1	3								1				1		1	1
MS.gene84568.t1	MsLAC127						1									1		1	1
MS.gene96844.t1	MsLAC128							3			1	1		1		1		1	1
MS.gene96856.t1	MsLAC129			1			2							1				1	1
MS.gene64554.t1	MsLAC130	1		2			1	2			2		1	1	1		1
MS.gene96583.t1	MsLAC131			1			1	3	1		1			1			5
MS.gene96581.t1	MsLAC132			2							2						2	1	1
MS.gene96577.t1	MsLAC133			1	1			2		1			2				1	1	1
MS.gene051249.t1	MsLAC134			1	1			2		1			2				1	1	1
MS.gene051248.t1	MsLAC135			3								1						1	1
MS.gene055124.t1	MsLAC136			1	2					1				1		1
MS.gene055125.t1	MsLAC137				2		1										3	1	1
MS.gene055257.t1	MsLAC138		1	1			1	2			1			4		1	2
MS.gene90316.t1	MsLAC139	1	1	2			2	2			1			2	1		1	1	1
MS.gene66061.t1	MsLAC140			2							1						2	1	1
MS.gene66063.t1	MsLAC141	1	1	2				2					2	4				1	1
MS.gene012654.t1	MsLAC142			1			3	1			2					1	3	1	1
MS.gene62870.t1	MsLAC143	1	1	3			1											1	1
MS.gene44958.t1	MsLAC144				1		1								1		1	3	3
MS.gene060530.t1	MsLAC145							1										1	1
MS.gene011504.t1	MsLAC146			1			2	1			2					1	3	2	2
MS.gene011878.t1	MsLAC147	1		2			2	1		1			1			1	1	2	2
MS.gene011879.t1	MsLAC148		1				1										2	1	1
MS.gene067288.t1	MsLAC149						1								1		2	3	3
MS.gene71912.t1	MsLAC150			1			2	1			2					1	3	2	2
MS.gene87345.t1	MsLAC151	1								1					1	1		1	1
MS.gene87346.t1	MsLAC152			1			1					1		1
MS.gene068376.t1	MsLAC153				1		1								1		1	3	3
MS.gene28549.t1	MsLAC154	1								1					1	2	2	1	1
MS.gene28548.t1	MsLAC155		1	3	1								1				5	1	1
MS.gene84742.t1	MsLAC156						1								1		2	3	3

## Sheet: Sheet6
	AuxRR-core	TGA-element	GT1-motif	MRE	TGA-box
MsLAC1			1	1
MsLAC2		2	2	1
MsLAC3		1
MsLAC4		1	1
MsLAC5		2	2	1
MsLAC6		1
MsLAC7		1	2
MsLAC8		2	2	1
MsLAC9	1	2	2
MsLAC10			2
MsLAC12				1
MsLAC13			1
MsLAC14			1
MsLAC15				1
MsLAC17			3	1
MsLAC18	1		5	1
MsLAC19		1		1
MsLAC20			2
MsLAC21	1	1	1
MsLAC24		2
MsLAC25		2	2
MsLAC26			2	4
MsLAC27	1		3	1
MsLAC28	1		2
MsLAC29		1		1
MsLAC30			2
MsLAC31	1	1	2
MsLAC32			2
MsLAC33	1		1
MsLAC34		1
MsLAC35		1
MsLAC36		1	5
MsLAC37		1	2	1
MsLAC38		1	1
MsLAC39	1		3	1
MsLAC40		2		1
MsLAC41			2
MsLAC42	1	1	1
MsLAC43			2
MsLAC44	1		1
MsLAC46		1
MsLAC47			2
MsLAC48		1	2	1
MsLAC49			3	1
MsLAC50	1		2
MsLAC51		1		1
MsLAC52			2
MsLAC53	1	1	1
MsLAC54		1	2
MsLAC55	1		1
MsLAC58
MsLAC59		1	2
MsLAC61			1
MsLAC62			3		1
MsLAC63			1	1
MsLAC64			4
MsLAC66			1	3
MsLAC67		2	2
MsLAC68			2	2
MsLAC69		1	7
MsLAC71			2
MsLAC72			3		1
MsLAC73			1	1
MsLAC74					1
MsLAC75			4
MsLAC76			2	2
MsLAC77			2
MsLAC78		1	5	2
MsLAC83			1	3
MsLAC84		1	3
MsLAC85			2
MsLAC86		1	5	2
MsLAC87			2
MsLAC88			1
MsLAC89			3		1
MsLAC90			1	1
MsLAC92			2
MsLAC93			1	3
MsLAC94		2	2
MsLAC95			2
MsLAC96		1	6	3
MsLAC97		1	3	2
MsLAC98		1
MsLAC99	1
MsLAC100			1	4
MsLAC103			4
MsLAC104			1
MsLAC105			4
MsLAC106	1	1	3
MsLAC107			1	4
MsLAC108			2	4
MsLAC109		1
MsLAC111			3	1	1
MsLAC112			1
MsLAC113		1	3
MsLAC114	1		2
MsLAC115			1	2
MsLAC116		1
MsLAC118			3		1
MsLAC120			1
MsLAC121			1	4
MsLAC122		1
MsLAC124			2
MsLAC126			3
MsLAC127			3
MsLAC128			1
MsLAC130		1	3	2
MsLAC131			1
MsLAC132			1
MsLAC133			3
MsLAC134	1		4
MsLAC135			1
MsLAC136	1		1	1
MsLAC137			3
MsLAC138			1
MsLAC139	1		2
MsLAC140			1
MsLAC142	1		3
MsLAC146			2
MsLAC147			2
MsLAC148			3	2
MsLAC149			3	2
MsLAC150		1	3
MsLAC153			1
MsLAC154	1		2
MsLAC155			1
MsLAC156			2
MsLAC157				1
MsLAC158			1	1
MsLAC159			1	1
MsLAC160			3
MsLAC161			1	2
MsLAC162				2
MsLAC163
MsLAC164		1	1
MsLAC165	1	1	2
MsLAC166			2
MsLAC167	1	1	2
MsLAC168	1
MsLAC169			1
MsLAC170	1
MsLAC171	1	1	3
MsLAC172				1
MsLAC174			1
MsLAC175	1		2
MsLAC176		1
MsLAC178			1
MsLAC179	1
MsLAC180			1
MsLAC181				1
MsLAC182		1	2
MsLAC183				1
MsLAC184	1
MsLAC185		1	3	1
MsLAC186

## Sheet: Sheet7
MsLAC9	1	MsLAC2	2	MsLAC2	2
MsLAC18	1	MsLAC3	1	MsLAC4	1
MsLAC21	1	MsLAC4	1	MsLAC5	2
MsLAC27	1	MsLAC5	2	MsLAC7	2
MsLAC28	1	MsLAC6	1	MsLAC8	2
MsLAC31	1	MsLAC7	1	MsLAC9	2
MsLAC33	1	MsLAC8	2	MsLAC21	1
MsLAC39	1	MsLAC9	2	MsLAC25	2
MsLAC42	1	MsLAC19	1	MsLAC31	2
MsLAC44	1	MsLAC21	1	MsLAC36	5
MsLAC50	1	MsLAC24	2	MsLAC37	2
MsLAC53	1	MsLAC25	2	MsLAC38	1
MsLAC55	1	MsLAC29	1	MsLAC42	1
MsLAC99	1	MsLAC31	1	MsLAC48	2
MsLAC106	1	MsLAC34	1	MsLAC53	1
MsLAC114	1	MsLAC35	1	MsLAC54	2
MsLAC134	1	MsLAC36	1	MsLAC59	2
MsLAC136	1	MsLAC37	1	MsLAC67	2
MsLAC139	1	MsLAC38	1	MsLAC69	7
MsLAC142	1	MsLAC40	2	MsLAC78	5
MsLAC154	1	MsLAC42	1	MsLAC84	3
MsLAC165	1	MsLAC46	1	MsLAC86	5
MsLAC167	1	MsLAC48	1	MsLAC94	2
MsLAC168	1	MsLAC51	1	MsLAC96	6
MsLAC170	1	MsLAC53	1	MsLAC97	3
MsLAC171	1	MsLAC54	1	MsLAC106	3
MsLAC175	1	MsLAC59	1	MsLAC113	3
MsLAC179	1	MsLAC67	2	MsLAC130	3
MsLAC184	1	MsLAC69	1	MsLAC150	3
		MsLAC78	1	MsLAC164	1
		MsLAC84	1	MsLAC165	2
		MsLAC86	1	MsLAC167	2
		MsLAC94	2	MsLAC171	3
		MsLAC96	1	MsLAC182	2
		MsLAC97	1	MsLAC185	3
		MsLAC98	1
		MsLAC106	1
		MsLAC109	1
		MsLAC113	1
		MsLAC116	1
		MsLAC122	1
		MsLAC130	1
		MsLAC150	1
		MsLAC164	1
		MsLAC165	1
		MsLAC167	1
		MsLAC171	1
		MsLAC176	1
		MsLAC182	1
		MsLAC185	1
