# Supplementary material
Source: Research Square preprint supplement (doi:10.21203/rs.3.rs-9789181/v1)
Supplement: Supplementary file 3 [file 4232db88807d75044e255941.xlsx]

## Sheet: LAC干旱
gene_id		CK	M1	M2	M3	M4	M5	M1vsCK_pvalue	M2vsCK_pvalue	M3vsCK_pvalue	M4vsCK_pvalue	M5vsCK_pvalue			gene_id	CK	M1	M2	M3	M4	M5
MS.gene27107	MsLAC1	0.130086	0	0	0	0	0	NA	NA	NA	NA	NA		MS.gene88984	MsLAC7	206.748	155.647	66.0419	95.6636	56.0379	111.523
MS.gene24091	MsLAC2	0	0	0	0	0	0	NA	NA	NA	NA	NA		MS.gene84361	MsLAC16	1.57272	1.79839	1.00648	1.51786	0.852373	0.146476
MS.gene040767	MsLAC3	0.138594	0.5384	0.472409	0	0	0.170139	0.471993	0.730523	NA	NA	1		MS.gene25900	MsLAC28	1.90463	2.83075	1.5004	0.298819	0.282165	0.562879
MS.gene005761	MsLAC4	0	0.229749	0.168049	0.241304	0.136767	0	0.594808	NA	0.577429	NA	NA		MS.gene014367	MsLAC35	3.16952	10.3048	6.05249	5.97887	4.26824	2.79213
MS.gene88938	MsLAC5	4.1882	3.38666	2.75856	2.43505	1.72224	1.81346	0.903762	0.667122	0.61233	0.36631	0.254342		MS.gene074403	MsLAC49	8.43846	2.58882	0.733674	0.857722	0.56433	0.30641
MS.gene68428	MsLAC6	0	0	0	0	0	0	NA	NA	NA	NA	NA		MS.gene074404	MsLAC50	0	0.235202	1.1583	0.118974	0.142884	0
MS.gene88984	MsLAC7	206.748	155.647	66.0419	95.6636	56.0379	111.523	0.530957	0.0262568	0.133562	0.00321782	0.194058		MS.gene41139	MsLAC60	0	0.451545	0.120771	0.338099	0.572745	1.10825
MS.gene21407	MsLAC8	0	0	0.111262	0	0	0	NA	NA	NA	NA	NA		MS.gene70354	MsLAC64	32.9911	42.5482	48.7982	11.9319	11.1682	20.1759
MS.gene35833	MsLAC9	0.260021	0.248262	0.352903	0.184076	0.207885	0	1	1	1	1	NA		MS.gene052289	MsLAC68	49.7197	112.874	87.576	45.003	46.9013	94.7402
MS.gene01142	MsLAC10	0	0	0	0	0	0	NA	NA	NA	NA	NA		MS.gene021147	MsLAC82	0.513398	0.803218	0.910962	0.634422	1.45444	6.34992
MS.gene059311	MsLAC11	0.270568	0.241236	0.352903	0.64076	0.152145	0.187378	1	1	0.732437	1	1		MS.gene010528	MsLAC86	0.133103	4.82472	0	0.484938	0.761321	1.17262
MS.gene002173	MsLAC12	0	0	0	0	0	0	NA	NA	NA	NA	NA		MS.gene44858	MsLAC96	2.91522	5.70712	4.66925	9.94434	7.43453	3.13298
MS.gene047086	MsLAC13	0	0	0	0	0	0	NA	NA	NA	NA	NA		MS.gene76101	MsLAC98	0.403581	0.960081	0.700155	1.21268	2.71682	8.67761
MS.gene034345	MsLAC14	0	0	0	0	0	0	NA	NA	NA	NA	NA		MS.gene047683	MsLAC99	6.32179	15.0088	12.0241	11.5327	2.61088	2.58012
MS.gene071950	MsLAC15	0	0	0	0	0	0	NA	NA	NA	NA	NA		MS.gene009922	MsLAC102	3.39165	7.38566	8.18107	10.8771	9.94184	4.3511
MS.gene84361	MsLAC16	1.57272	1.79839	1.00648	1.51786	0.852373	0.146476	0.892665	0.626598	1	0.561548	0.0211915		MS.gene29699	MsLAC105	0	0.11905	0	0.363644	0.395275	2.19223
MS.gene04575	MsLAC17	6.51003	12.3773	7.50248	7.81504	7.25884	12.834	0.226459	0.821455	0.790188	0.864541	0.186653		MS.gene59387	MsLAC107	1.54665	3.68849	2.29316	7.46317	7.90969	5.20454
MS.gene70576	MsLAC18	0.499201	0.365343	0.293811	0	0	0.17877	1	0.776835	0.28299	0.39454	0.730087		MS.gene94205	MsLAC111	2.29653	2.22278	0.697619	2.79569	4.3766	15.5947
MS.gene70575	MsLAC19	0	0	0	0	0.142884	0	NA	NA	NA	NA	NA		MS.gene65111	MsLAC116	1.86229	3.56381	3.38193	4.28397	3.74479	5.55467
MS.gene70574	MsLAC20	0	0	0	0	0	0	NA	NA	NA	NA	NA		MS.gene46161	MsLAC122	2.97315	2.35735	1.42385	2.00173	0.457851	1.02302
MS.gene79849	MsLAC21	0.274435	0.4737	1.12269	0.504728	0.698584	0.999813	1	0.311268	1	0.728719	0.458411		MS.gene62870	MsLAC143	92.0683	58.6253	30.4159	28.7942	13.4764	26.5514
MS.gene48502	MsLAC22	0	0	0	0	0	0	NA	NA	NA	NA	NA		MS.gene44958	MsLAC144	43.939	49.9063	26.3738	24.0733	8.9474	5.70833
MS.gene48504	MsLAC23	0	0.121292	0	0	0	0.135159	NA	NA	NA	NA	NA		MS.gene011878	MsLAC147	25.0278	32.3978	17.6887	9.48753	3.19816	3.42363
MS.gene52790	MsLAC24	0	0.248149	0.110446	0	0	0	0.597912	NA	NA	NA	NA		MS.gene011879	MsLAC148	222.49	239.728	132.952	81.4167	26.4796	16.6479
MS.gene058407	MsLAC25	0.119319	0.220046	0	0.167907	0.459398	0	1	NA	1	0.630187	NA		MS.gene87346	MsLAC152	49.2392	59.8245	39.1674	20.1319	11.9566	4.77081
MS.gene05606	MsLAC26	5.64904	7.22338	3.10498	4.10427	5.60379	10.0663	0.609857	0.345613	0.617021	1	0.221864		MS.gene28549	MsLAC154	1.62774	0.124992	1.14955	0.126451	0.151864	0.160285
MS.gene039999	MsLAC27	0	0	0.210833	0.348165	0	0.127111	NA	0.56823	0.599216	NA	NA		MS.gene28548	MsLAC155	43.5055	31.5937	24.2351	13.0309	4.58007	1.73442
MS.gene25900	MsLAC28	1.90463	2.83075	1.5004	0.298819	0.282165	0.562879	0.528774	0.688493	0.045755	0.0572773	0.155194
MS.gene25899	MsLAC29	0.131251	0.230877	0.848819	0.464716	0.277749	0	1	0.201044	0.676861	1	NA
MS.gene25898	MsLAC30	0	0	0	0	0	0	NA	NA	NA	NA	NA
MS.gene77483	MsLAC31	0	0	0	0	0	0.183971	NA	NA	NA	NA	NA
MS.gene77484	MsLAC32	0	0	0	0	0	0	NA	NA	NA	NA	NA
MS.gene012985	MsLAC33	0	0	0	0	0	0	NA	NA	NA	NA	NA
MS.gene012984	MsLAC34	0	0	0	0	0	0	NA	NA	NA	NA	NA
MS.gene014367	MsLAC35	3.16952	10.3048	6.05249	5.97887	4.26824	2.79213	0.0152319	0.218774	0.230383	0.590273	0.926053
MS.gene04051	MsLAC36	9.27954	21.1464	9.09026	7.29482	8.02657	14.1108	0.0843664	1	0.66859	0.844242	0.334333
MS.gene007998	MsLAC37	0.272453	0.122059	0.408827	1.5077	0.685217	0.262024	1	1	0.213812	0.749966	1
MS.gene022247	MsLAC38	0.3744	0.241252	0.106348	0.246397	0	0	1	0.721743	1	0.58663	0.388005
MS.gene022246	MsLAC39	0.760795	1.86886	1.0114	0.36381	0.277749	0.326779	0.27879	0.836767	0.786292	0.503369	0.503181
MS.gene022245	MsLAC40	0	0	0	0	0	0	NA	NA	NA	NA	NA
MS.gene75721	MsLAC41	0	0	0	0	0	0	NA	NA	NA	NA	NA
MS.gene75720	MsLAC42	0	0	0	0	0	0	NA	NA	NA	NA	NA
MS.gene38718	MsLAC43	0	0	0	0	0	0	NA	NA	NA	NA	NA
MS.gene38717	MsLAC44	0	0	0	0	0	0	NA	NA	NA	NA	NA
MS.gene69347	MsLAC45	0.129609	0.126473	0.1303	0	0	0	1	1	NA	NA	NA
MS.gene009433	MsLAC46	0.86919	0.80915	0.164566	0.593039	0.141897	0.300112	1	0.167608	0.804637	0.157999	0.335843
MS.gene04460	MsLAC47	6.41569	11.6384	4.69677	4.34916	6.88763	11.5148	0.207315	0.637166	0.545503	0.882995	0.185793
MS.gene031917	MsLAC48	0	0	0	0	0	0.127111	NA	NA	NA	NA	NA
MS.gene074403	MsLAC49	8.43846	2.58882	0.733674	0.857722	0.56433	0.30641	0.163407	0.0112882	0.0128749	0.00576752	0.00173368
MS.gene074404	MsLAC50	0	0.235202	1.1583	0.118974	0.142884	0	0.600246	0.0239242	NA	NA	NA
MS.gene045406	MsLAC51	0	0	0	0	0	0	NA	NA	NA	NA	NA
MS.gene045405	MsLAC52	0	0	0	0	0	0	NA	NA	NA	NA	NA
MS.gene054639	MsLAC53	0	0	0	0	0	0	NA	NA	NA	NA	NA
MS.gene054640	MsLAC54	0	0	0	0	0	0	NA	NA	NA	NA	NA
MS.gene064814	MsLAC55	0.387244	1.32855	0.110446	0.251045	0.150749	0.318217	0.289901	1	1	1	1
MS.gene006862	MsLAC56	0	0	0	0	0	0	NA	NA	NA	NA	NA
MS.gene006860	MsLAC57	0	0	0	0	0	0	NA	NA	NA	NA	NA
MS.gene006859	MsLAC58	0	0	0	0	0	0	NA	NA	NA	NA	NA
MS.gene003390	MsLAC59	2.81246	4.61116	2.75913	1.32907	1.25308	3.83389	0.423416	1	0.306277	0.2257	0.585032
MS.gene41139	MsLAC60	0	0.451545	0.120771	0.338099	0.572745	1.10825	0.162122	NA	0.60115	0.312093	0.0172108
MS.gene61580	MsLAC61	2.92317	2.50545	2.50911	1.44904	2.0892	1.69058	0.916624	0.920434	0.233351	0.710333	0.368337
MS.gene73256	MsLAC62	0	0	0	0	0	0	NA	NA	NA	NA	NA
MS.gene037429	MsLAC63	10.3498	15.4274	6.50674	9.48297	7.736	13.565	0.410881	0.433154	0.916538	0.619618	0.531599
MS.gene70354	MsLAC64	32.9911	42.5482	48.7982	11.9319	11.1682	20.1759	0.525103	0.358613	0.0355464	0.0602531	0.300384
MS.gene82393	MsLAC65	0	0	0	0	0	0	NA	NA	NA	NA	NA
MS.gene82389	MsLAC66	0	0	0	0	0	0	NA	NA	NA	NA	NA
MS.gene82388	MsLAC67	0	0	0	0	0	0	NA	NA	NA	NA	NA
MS.gene052289	MsLAC68	49.7197	112.874	87.576	45.003	46.9013	94.7402	0.0337912	0.229396	0.883916	0.929616	0.0710322
MS.gene92589	MsLAC69	0.859918	0	0.619663	1.00489	1.04011	1.7706	0.0784797	1	1	0.825194	0.321307
MS.gene89907	MsLAC70	0.39709	0.123527	0	0	0.48739	0.674073	0.663189	0.286018	0.282649	1	1
MS.gene059697	MsLAC71	0	0	0	0	0	0	NA	NA	NA	NA	NA
MS.gene030765	MsLAC72	1.29959	3.92468	2.23499	0.483399	1.10714	1.42779	0.130477	0.599574	0.420388	1	1
MS.gene059690	MsLAC73	0.889864	1.0768	0.768671	0	0.622868	0.348249	1	1	0.282847	1	0.659682
MS.gene004011	MsLAC74	0.238795	0.572999	0.120771	0.118589	0.27945	0.615073	0.729252	1	1	1	0.422208
MS.gene95576	MsLAC75	1.46687	1.99635	2.14117	1.7197	0.665553	1.47663	0.654391	0.682853	1	0.393953	1
MS.gene037658	MsLAC76	0	0	0	0	0	0	NA	NA	NA	NA	NA
MS.gene33479	MsLAC77	4.24127	4.67072	1.54879	2.26431	2.85071	5.71366	0.882268	0.232256	0.415804	0.631864	0.645588
MS.gene56463	MsLAC78	0	0	0	0	0	0	NA	NA	NA	NA	NA
MS.gene56466	MsLAC79	0.277973	0.124531	0.175476	0	0	0.505731	1	1	0.572078	0.576064	1
MS.gene56467	MsLAC80	0	0	0	0	0	0	NA	NA	NA	NA	NA
MS.gene28940	MsLAC81	14.0979	15.6677	9.24594	8.89158	7.64598	20.2447	0.728911	0.436819	0.329691	0.177492	0.332014
MS.gene021147	MsLAC82	0.513398	0.803218	0.910962	0.634422	1.45444	6.34992	0.817883	0.717447	1	0.317798	9.13744e-05
MS.gene027389	MsLAC83	0.856179	1.78892	2.00897	2.11054	0.16665	0.675577	0.294336	0.290443	0.331045	0.459636	1
MS.gene048082	MsLAC84	3.69557	0.822187	2.46291	1.81849	4.40088	3.38652	0.114493	0.804586	0.533965	0.759568	1
MS.gene052753	MsLAC85	5.21422	5.27461	3.50319	5.31874	5.87979	7.78417	0.961564	0.56872	0.957986	0.867217	0.385237
MS.gene010528	MsLAC86	0.133103	4.82472	0	0.484938	0.761321	1.17262	0.0144967	NA	0.68024	0.246468	0.176145
MS.gene010533	MsLAC87	0.249842	0	0	0	0.199747	0	NA	NA	NA	1	NA
MS.gene43755	MsLAC88	1.91367	1.78593	2.19482	3.97692	2.30211	2.25281	1	0.819172	0.244853	0.791913	0.783725
MS.gene35871	MsLAC89	6.76965	7.46151	8.11341	7.95787	17.5086	12.003	0.837381	0.719452	0.765462	0.0727841	0.216686
MS.gene56689	MsLAC90	0.108278	0.292925	0.340474	0.142613	0	0	0.66274	0.667187	1	NA	NA
MS.gene51086	MsLAC91	0	0.229344	0	0	1.07791	0.483472	0.594704	NA	NA	0.0609279	0.291977
MS.gene041141	MsLAC92	2.57068	6.14017	2.54618	4.02876	2.45193	0.913458	0.184305	1	0.526629	1	0.222147
MS.gene010526	MsLAC93	0	0	0	0	0	0	NA	NA	NA	NA	NA
MS.gene02463	MsLAC94	0	0	0	0	0	0	NA	NA	NA	NA	NA
MS.gene64676	MsLAC95	0	0	0	0	0	0	NA	NA	NA	NA	NA
MS.gene44858	MsLAC96	2.91522	5.70712	4.66925	9.94434	7.43453	3.13298	0.255926	0.481416	0.044573	0.0925154	1
MS.gene50248	MsLAC97	73.2035	86.6718	60.9616	99.8733	131.58	109.865	0.67036	0.699109	0.416171	0.125648	0.263003
MS.gene76101	MsLAC98	0.403581	0.960081	0.700155	1.21268	2.71682	8.67761	0.465556	0.791437	0.361361	0.0268662	0.000358077
MS.gene047683	MsLAC99	6.32179	15.0088	12.0241	11.5327	2.61088	2.58012	0.0378944	0.153026	0.211696	0.0869224	0.083661
MS.gene02442	MsLAC100	53.2302	61.1164	44.704	53.3168	77.3581	53.6775	0.710228	0.874975	0.937633	0.533876	0.936294
MS.gene02440	MsLAC101	0.768259	0.610912	1.08118	1.37595	1.88212	3.29368	1	0.851051	0.570185	0.261972	0.0581181
MS.gene009922	MsLAC102	3.39165	7.38566	8.18107	10.8771	9.94184	4.3511	0.101442	0.0975942	0.0355067	0.0419264	0.603927
MS.gene009762	MsLAC103	15.328	11.8629	9.87654	21.5587	24.9726	26.8953	0.622622	0.400411	0.386737	0.285889	0.16269
MS.gene070066	MsLAC104	0.135981	0.117358	0.343365	0.430381	0.404533	0.130776	1	1	0.658658	1	1
MS.gene29699	MsLAC105	0	0.11905	0	0.363644	0.395275	2.19223	NA	NA	0.277667	0.600213	0.00111772
MS.gene59385	MsLAC106	0	0.482257	0.167458	0.349389	0.19729	0.255116	0.199158	NA	0.600204	NA	0.585084
MS.gene59387	MsLAC107	1.54665	3.68849	2.29316	7.46317	7.90969	5.20454	0.135207	0.510465	0.0124741	0.00760355	0.0273245
MS.gene88734	MsLAC108	1.95596	4.05339	1.59811	4.83593	3.31878	1.838	0.270157	0.819918	0.146746	0.413954	1
MS.gene041990	MsLAC109	63.177	71.7419	42.1694	77.6796	92.179	102.849	0.716598	0.367922	0.580844	0.294266	0.171944
MS.gene80645	MsLAC110	0.135981	0	0.171682	0	0	0.156242	NA	1	NA	NA	1
MS.gene94205	MsLAC111	2.29653	2.22278	0.697619	2.79569	4.3766	15.5947	1	0.155738	0.844114	0.341387	0.000446379
MS.gene94790	MsLAC112	50.9353	33.4545	23.0209	22.9059	24.8671	41.1516	0.364308	0.102036	0.0785124	0.120934	0.644661
MS.gene94791	MsLAC113	0	0	0	0	0	0	NA	NA	NA	NA	NA
MS.gene99610	MsLAC114	2.09191	1.81767	0.882144	0.517292	0.580638	0.877033	0.907132	0.211831	0.0840986	0.11999	0.236239
MS.gene65188	MsLAC115	0.264927	0.623853	0.741108	0.823289	1.36037	0	0.748096	0.285094	0.310132	0.134624	NA
MS.gene65111	MsLAC116	1.86229	3.56381	3.38193	4.28397	3.74479	5.55467	0.220522	0.382097	0.185039	0.27525	0.0272578
MS.gene65109	MsLAC117	5.68678	6.57812	3.64953	4.87497	8.07716	9.49446	0.696957	0.598275	0.922195	0.57208	0.30422
MS.gene011006	MsLAC118	0.819446	0.752859	0.837412	0.524765	0.310618	0.465045	1	1	0.789354	0.566183	0.783578
MS.gene77227	MsLAC119	17.3916	27.9709	16.7275	18.984	26.3095	33.4657	0.205553	1	0.827804	0.341057	0.107821
MS.gene91701	MsLAC120	0	0.122894	0.42734	0.448191	0.81447	0.655081	NA	0.250673	0.250609	0.0700903	0.135569
MS.gene46170	MsLAC121	0.138986	0.479806	0	0.254402	0	0.186343	0.737666	NA	1	NA	1
MS.gene46161	MsLAC122	2.97315	2.35735	1.42385	2.00173	0.457851	1.02302	0.736806	0.246047	0.546977	0.0175046	0.124483
MS.gene46028	MsLAC123	0	0	0	0.12212	0.393198	0.35441	NA	NA	NA	0.59882	0.599328
MS.gene46027	MsLAC124	38.6405	23.3872	16.1034	18.9604	19.8631	40.709	0.298724	0.102791	0.125861	0.175007	0.878989
MS.gene051251	MsLAC125	0	0	0	0	0	0	NA	NA	NA	NA	NA
MS.gene23169	MsLAC126	1.18279	0.238544	0.724321	1.02456	0.492126	0.308591	0.182794	0.700962	1	0.386622	0.265164
MS.gene84568	MsLAC127	21.5721	22.1158	11.8434	14.7773	16.6167	24.9973	0.922144	0.208324	0.458296	0.604925	0.710131
MS.gene96844	MsLAC128	0.746047	2.24351	0.261745	0.515069	0.3273	0.608293	0.171092	0.412149	0.804271	0.542081	1
MS.gene96856	MsLAC129	0	0.347873	0.165423	0	0	0	0.288289	NA	NA	NA	NA
MS.gene64554	MsLAC130	0.682995	0.746747	0.493549	1.25437	0.724946	0.518771	1	1	0.576366	1	1
MS.gene96583	MsLAC131	0.276953	0.124074	0.1303	0	0	0.185659	1	1	0.572131	0.575393	1
MS.gene96581	MsLAC132	2.36911	3.10457	2.86964	4.05727	4.50969	4.55897	0.591814	0.713545	0.387784	0.280406	0.220128
MS.gene96577	MsLAC133	5.36036	11.8607	6.41225	11.1254	8.44164	9.83658	0.0534646	0.683763	0.133415	0.36922	0.148724
MS.gene051249	MsLAC134	0.156971	0	0	0	0	0	NA	NA	NA	NA	NA
MS.gene051248	MsLAC135	0	0	0	0	0	0	NA	NA	NA	NA	NA
MS.gene055124	MsLAC136	79.5893	56.194	38.2723	36.1835	38.0597	72.6135	0.425221	0.0972419	0.0601085	0.0768603	0.869216
MS.gene055125	MsLAC137	0	0.11407	0	0.348165	0.196599	0	NA	NA	0.598362	NA	NA
MS.gene055257	MsLAC138	2.5885	2.63948	2.14826	2.38842	0.970043	0.763844	1	0.832587	1	0.134357	0.0655383
MS.gene90316	MsLAC139	0.275673	1.63564	0.493549	1.38594	2.24903	0.273889	0.0506984	1	0.259253	0.0610049	1
MS.gene66061	MsLAC140	0.802673	0.613645	0.331337	0.251045	0.411956	0.133175	0.785877	0.547249	0.530404	0.542931	0.263746
MS.gene66063	MsLAC141	7.07108	10.5975	4.98731	15.2068	8.90178	12.6299	0.353471	0.633666	0.193495	0.684938	0.212479
MS.gene012654	MsLAC142	0	0	0	0	0	0	NA	NA	NA	NA	NA
MS.gene62870	MsLAC143	92.0683	58.6253	30.4159	28.7942	13.4764	26.5514	0.254663	0.00881033	0.00262802	1.83498e-05	0.000578087
MS.gene44958	MsLAC144	43.939	49.9063	26.3738	24.0733	8.9474	5.70833	0.755763	0.269479	0.196072	0.000693707	1.64939e-05
MS.gene060530	MsLAC145	0	0	0.16658	0	0	0	NA	NA	NA	NA	NA
MS.gene011504	MsLAC146	0	0	0.161225	0	0	0	NA	NA	NA	NA	NA
MS.gene011878	MsLAC147	25.0278	32.3978	17.6887	9.48753	3.19816	3.42363	0.48426	0.503612	0.0322371	4.092e-05	5.54384e-05
MS.gene011879	MsLAC148	222.49	239.728	132.952	81.4167	26.4796	16.6479	0.86496	0.294508	0.0403801	6.45844e-05	5.18797e-05
MS.gene067288	MsLAC149	0	0	0.109641	0.181058	0	0	NA	NA	NA	NA	NA
MS.gene71912	MsLAC150	0	0	0	0	0	0	NA	NA	NA	NA	NA
MS.gene87345	MsLAC151	0.808608	1.13	0.35225	0.255342	0	0.294445	0.836579	0.546905	0.506373	0.0826287	0.501871
MS.gene87346	MsLAC152	49.2392	59.8245	39.1674	20.1319	11.9566	4.77081	0.603685	0.614001	0.0420357	0.00111873	1.24581e-06
MS.gene068376	MsLAC153	0.394797	0.125552	0	0	0	0	0.658839	0.279802	0.277752	0.264223	0.269847
MS.gene28549	MsLAC154	1.62774	0.124992	1.14955	0.126451	0.151864	0.160285	0.032632	0.649086	0.0337423	0.0445427	0.0432855
MS.gene28548	MsLAC155	43.5055	31.5937	24.2351	13.0309	4.58007	1.73442	0.501327	0.312256	0.0153466	8.93516e-05	2.16213e-07
MS.gene84742	MsLAC156	0.255758	0.374274	0.173559	0	0	0	0.677569	1	NA	NA	NA

## Sheet: LAC盐
gene_id		CK	S1	S2	S3	S4	S5	S6	S1vsCK_pvalue	S2vsCK_pvalue	S3vsCK_pvalue	S4vsCK_pvalue	S5vsCK_pvalue	S6vsCK_pvalue
MS.gene27107	MsLAC1	0.130086	0	0.126594	0	0	0	0	NA	1	NA	NA	NA	NA
MS.gene24091	MsLAC2	0	0	0	0	0	0	0	NA	NA	NA	NA	NA	NA
MS.gene040767	MsLAC3	0.138594	0.143189	0.215451	0.13225	0	0.435005	0.156775	1	1	1	NA	0.654762	1
MS.gene005761	MsLAC4	0	0.124867	0	0	0.153446	0.432946	0.305054	NA	NA	NA	NA	0.250494	0.501073
MS.gene88938	MsLAC5	4.1882	1.71727	5.0555	1.54204	1.49715	0.456532	0.770521	0.18545	0.653567	0.233493	0.208213	0.01527	0.0620827
MS.gene68428	MsLAC6	0	0	0	0	0	0	0	NA	NA	NA	NA	NA	NA
MS.gene88984	MsLAC7	206.748	131.799	94.6531	113.972	45.3374	21.6661	57.1984	0.301454	0.0874356	0.313022	0.00499998	4.32914e-06	0.0054631
MS.gene21407	MsLAC8	0	0	0.119704	0	0	0	0.147695	NA	NA	NA	NA	NA	NA
MS.gene35833	MsLAC9	0.260021	0.405436	0.127298	0.160439	0.567059	0.13984	0.147969	1	1	1	0.807487	1	1
MS.gene01142	MsLAC10	0	0	0	0	0	0	0	NA	NA	NA	NA	NA	NA
MS.gene059311	MsLAC11	0.270568	0.528845	0.857268	0.913571	0.378966	0.135365	0	0.699781	0.53002	0.350875	1	1	0.500349
MS.gene002173	MsLAC12	0	0	0	0	0	0	0	NA	NA	NA	NA	NA	NA
MS.gene047086	MsLAC13	0	0	0	0	0	0	0	NA	NA	NA	NA	NA	NA
MS.gene034345	MsLAC14	0	0	0	0	0	0	0	NA	NA	NA	NA	NA	NA
MS.gene071950	MsLAC15	0	0	0	0	0	0	0	NA	NA	NA	NA	NA	NA
MS.gene84361	MsLAC16	1.57272	2.64546	1.68122	2.60587	2.16337	0.908561	0.30183	0.390636	1	0.507097	0.626139	0.59396	0.0810369
MS.gene04575	MsLAC17	6.51003	6.16698	5.78318	5.22722	6.73702	6.8238	10.4614	0.894195	0.862474	0.789759	0.968048	0.96524	0.354794
MS.gene70576	MsLAC18	0.499201	0.379463	0.558358	0	0.135253	0.342296	0.164421	1	1	0.398454	0.730341	1	0.72902
MS.gene70575	MsLAC19	0	0	0	0	0	0.127125	0	NA	NA	NA	NA	NA	NA
MS.gene70574	MsLAC20	0	0	0	0	0	0	0	NA	NA	NA	NA	NA	NA
MS.gene79849	MsLAC21	0.274435	0.90541	0.963676	2.52098	1.24904	0.661285	3.48905	0.41057	0.325185	0.0686197	0.182985	0.765631	0.0414692
MS.gene48502	MsLAC22	0	0	0	0	0	0	0	NA	NA	NA	NA	NA	NA
MS.gene48504	MsLAC23	0	0	0	0	0	0	0	NA	NA	NA	NA	NA	NA
MS.gene52790	MsLAC24	0	0	0.402965	0.247353	0	0	0	NA	0.597737	0.571404	NA	NA	NA
MS.gene058407	MsLAC25	0.119319	0.123274	0	0.394285	0.129312	0.246949	0.1572	1	NA	0.655113	1	1	1
MS.gene05606	MsLAC26	5.64904	3.72216	2.55395	3.26472	6.21675	3.19751	6.92597	0.440504	0.194975	0.400238	0.80818	0.349787	0.692583
MS.gene039999	MsLAC27	0	0.12434	0.192308	0	0.271835	0	0.139935	NA	NA	NA	0.505052	NA	NA
MS.gene25900	MsLAC28	1.90463	1.89977	1.99309	0.293309	0.255772	0.129147	0.338945	1	1	0.0451907	0.0439062	0.015765	0.0566039
MS.gene25899	MsLAC29	0.131251	0	0.381941	0.267897	0.151312	0.131328	0	NA	1	1	1	1	NA
MS.gene25898	MsLAC30	0	0	0.114568	0	0	0	0	NA	NA	NA	NA	NA	NA
MS.gene77483	MsLAC31	0	0	0	0	0	0	0	NA	NA	NA	NA	NA	NA
MS.gene77484	MsLAC32	0	0	0	0	0	0	0	NA	NA	NA	NA	NA	NA
MS.gene012985	MsLAC33	0	0	0	0	0	0	0	NA	NA	NA	NA	NA	NA
MS.gene012984	MsLAC34	0	0	0	0	0	0	0	NA	NA	NA	NA	NA	NA
MS.gene014367	MsLAC35	3.16952	10.2935	6.75858	7.49909	6.81307	4.35192	1.85835	0.0103178	0.135698	0.174033	0.1521	0.542613	0.336432
MS.gene04051	MsLAC36	9.27954	5.62254	6.72342	6.60682	5.15031	3.89581	7.92593	0.288433	0.526288	0.583417	0.277858	0.0987169	0.808303
MS.gene007998	MsLAC37	0.272453	0.127798	0.198209	0.35599	0.276365	0	0.534913	1	1	1	1	0.570153	1
MS.gene022247	MsLAC38	0.3744	0	0.114417	0.272157	0.274237	0	0	0.388003	0.716731	1	1	0.389206	0.390658
MS.gene022246	MsLAC39	0.760795	0.990898	1.33141	0.791063	0.744475	0.299797	0.171792	1	0.555432	1	1	0.500567	0.269053
MS.gene022245	MsLAC40	0	0.11833	0	0.112339	0	0	0	NA	NA	NA	NA	NA	NA
MS.gene75721	MsLAC41	0	0	0	0	0	0	0.179601	NA	NA	NA	NA	NA	NA
MS.gene75720	MsLAC42	0	0.128493	0.199289	0	0	0	0	NA	NA	NA	NA	NA	NA
MS.gene38718	MsLAC43	0	0	0	0	0	0	0	NA	NA	NA	NA	NA	NA
MS.gene38717	MsLAC44	0	0	0	0	0.118839	0	0	NA	NA	NA	NA	NA	NA
MS.gene69347	MsLAC45	0.129609	0	0.12613	0	0.265627	0.177743	0	NA	1	NA	1	1	NA
MS.gene009433	MsLAC46	0.86919	1.12001	0.566114	0.55277	0.35344	0.382914	0	0.822894	0.798727	0.779999	0.594737	0.55534	0.0398763
MS.gene04460	MsLAC47	6.41569	6.01632	5.6772	5.81718	8.19382	5.422	8.95019	0.914728	0.876208	0.956748	0.576758	0.817814	0.442262
MS.gene031917	MsLAC48	0	0	0	0	0	0	0	NA	NA	NA	NA	NA	NA
MS.gene074403	MsLAC49	8.43846	1.50421	1.42927	1.75203	2.90217	0.129147	0.523572	0.0412447	0.0422228	0.076853	0.276837	0.000369604	0.00470998
MS.gene074404	MsLAC50	0	0.123475	0.119549	0.472841	0.118633	0	0.171792	NA	NA	0.296087	NA	NA	NA
MS.gene045406	MsLAC51	0	0	0	0	0	0	0	NA	NA	NA	NA	NA	NA
MS.gene045405	MsLAC52	0	0	0	0	0	0	0	NA	NA	NA	NA	NA	NA
MS.gene054639	MsLAC53	0	0	0	0	0	0	0	NA	NA	NA	NA	NA	NA
MS.gene054640	MsLAC54	0	0	0	0	0	0	0	NA	NA	NA	NA	NA	NA
MS.gene064814	MsLAC55	0.387244	0.519995	0.244955	0	0.125163	0.177743	0.341513	0.734185	1	0.516692	1	1	1
MS.gene006862	MsLAC56	0	0	0	0	0	0	0	NA	NA	NA	NA	NA	NA
MS.gene006860	MsLAC57	0	0	0	0	0	0	0	NA	NA	NA	NA	NA	NA
MS.gene006859	MsLAC58	0	0	0	0	0	0	0	NA	NA	NA	NA	NA	NA
MS.gene003390	MsLAC59	2.81246	2.88871	1.8399	1.04359	1.71176	0.494951	1.48809	1	0.464138	0.1952	0.508272	0.0187476	0.321583
MS.gene41139	MsLAC60	0	0.244521	0.110136	0	0.675919	1.01918	1.18636	0.500288	NA	NA	0.124977	0.0650705	0.0187286
MS.gene61580	MsLAC61	2.92317	3.43615	1.54751	2.86159	3.23218	1.90877	3.44851	0.84639	0.326915	1	0.920518	0.522349	0.74929
MS.gene73256	MsLAC62	0	0	0	0	0	0	0	NA	NA	NA	NA	NA	NA
MS.gene037429	MsLAC63	10.3498	8.86769	7.00343	9.29766	9.94125	5.85441	13.3506	0.7885	0.488715	0.948513	1	0.294671	0.557647
MS.gene70354	MsLAC64	32.9911	25.3034	57.5458	20.8306	20.8048	5.56358	5.66607	0.530859	0.186979	0.367627	0.425045	0.000209766	0.00267241
MS.gene82393	MsLAC65	0	0	0	0	0	0	0	NA	NA	NA	NA	NA	NA
MS.gene82389	MsLAC66	0	0	0	0	0	0	0	NA	NA	NA	NA	NA	NA
MS.gene82388	MsLAC67	0	0	0	0	0	0	0	NA	NA	NA	NA	NA	NA
MS.gene052289	MsLAC68	49.7197	39.2199	64.302	43.4633	40.8308	12.7638	39.0431	0.510206	0.45122	0.826151	0.716859	0.000217122	0.54944
MS.gene92589	MsLAC69	0.859918	0.750348	0.842297	0.461819	1.75649	0.68355	0.139447	1	1	0.78941	0.529712	1	0.317343
MS.gene89907	MsLAC70	0.39709	0.254118	0	0.120795	0.122247	0.744529	0	1	0.276799	0.656402	0.659513	0.755463	0.274044
MS.gene059697	MsLAC71	0	0	0	0	0	0	0	NA	NA	NA	NA	NA	NA
MS.gene030765	MsLAC72	1.29959	1.96669	2.62281	2.21058	0.538017	0	0.332483	0.76072	0.476371	0.567689	0.505609	0.0490229	0.236357
MS.gene059690	MsLAC73	0.889864	0.568673	0.780239	0.618638	0	0.293562	0.396709	1	1	1	0.285673	0.656793	0.662633
MS.gene004011	MsLAC74	0.238795	0.120408	0	0.147342	0	0	0.746587	1	NA	1	NA	NA	0.328915
MS.gene95576	MsLAC75	1.46687	1.59719	2.52383	1.82127	2.06481	2.32129	1.57194	1	0.432459	0.880182	0.663591	0.44771	1
MS.gene037658	MsLAC76	0	0	0	0	0	0	0	NA	NA	NA	NA	NA	NA
MS.gene33479	MsLAC77	4.24127	2.6885	1.75148	2.76097	3.27275	2.40717	4.47918	0.518541	0.276535	0.599476	0.775636	0.49481	0.953089
MS.gene56463	MsLAC78	0	0	0	0	0	0	0	NA	NA	NA	NA	NA	NA
MS.gene56466	MsLAC79	0.277973	0	0	0	0	0	0	0.568895	0.567656	0.581929	0.582493	0.569975	0.57878
MS.gene56467	MsLAC80	0	0	0	0	0	0	0	NA	NA	NA	NA	NA	NA
MS.gene28940	MsLAC81	14.0979	9.73791	10.7462	5.75892	6.94843	0.828428	14.1468	0.383421	0.55381	0.0520829	0.123765	4.81133e-07	0.94843
MS.gene021147	MsLAC82	0.513398	0.602039	0.804802	0.523948	2.07389	1.80549	4.09156	1	0.842386	1	0.181169	0.194631	0.0114805
MS.gene027389	MsLAC83	0.856179	2.61753	2.67896	2.25049	2.03577	1.77202	1.09082	0.0871567	0.109867	0.174375	0.263623	0.510118	0.798369
MS.gene048082	MsLAC84	3.69557	0.87287	4.18282	2.54089	4.21495	2.19509	0.311839	0.0994894	0.829346	0.778188	0.715409	0.618985	0.0235236
MS.gene052753	MsLAC85	5.21422	3.21285	1.87153	4.3475	3.65466	2.87196	9.0753	0.39765	0.138115	0.903782	0.636647	0.329099	0.228892
MS.gene010528	MsLAC86	0.133103	0.378794	0.706353	0	0.547506	0	0.676695	0.627375	0.299656	NA	0.4483	NA	0.449449
MS.gene010533	MsLAC87	0.249842	0	0	0	0	0	0	NA	NA	NA	NA	NA	NA
MS.gene43755	MsLAC88	1.91367	1.79123	0.856271	3.4906	4.06134	1.38043	2.39687	1	0.506092	0.261154	0.186066	0.881059	0.682278
MS.gene35871	MsLAC89	6.76965	7.6575	6.73585	6.87146	6.68388	4.96541	8.77384	0.774842	1	0.926674	0.964751	0.596629	0.545604
MS.gene56689	MsLAC90	0.108278	0	0.157544	0	0.124827	0	0.114639	NA	1	NA	1	NA	1
MS.gene51086	MsLAC91	0	0	0.228028	0	0.120095	0.261638	0.836312	NA	0.555947	NA	NA	0.500329	0.153655
MS.gene041141	MsLAC92	2.57068	5.55766	2.651	5.93319	1.57798	1.26465	1.35365	0.190458	1	0.166068	0.487972	0.409837	0.375841
MS.gene010526	MsLAC93	0	0	0	0	0	0	0	NA	NA	NA	NA	NA	NA
MS.gene02463	MsLAC94	0	0	0	0	0	0	0	NA	NA	NA	NA	NA	NA
MS.gene64676	MsLAC95	0	0	0	0	0	0	0	NA	NA	NA	NA	NA	NA
MS.gene44858	MsLAC96	2.91522	3.84003	4.7017	6.8662	12.2454	2.58482	5.60667	0.705946	0.453375	0.121494	0.0120031	0.927423	0.258326
MS.gene50248	MsLAC97	73.2035	66.643	59.8031	64.1747	103.775	50.9039	147.661	0.788726	0.611715	0.820203	0.352649	0.371123	0.0545445
MS.gene76101	MsLAC98	0.403581	0.256643	1.02508	0.965238	1.89574	1.00976	5.49049	1	0.457232	0.467101	0.0821862	0.441711	0.000612806
MS.gene047683	MsLAC99	6.32179	12.3185	10.2296	8.10131	5.9076	5.58128	4.35743	0.09687	0.28132	0.610834	0.954582	0.858334	0.43581
MS.gene02442	MsLAC100	53.2302	37.4821	40.0486	41.3998	54.1576	47.3052	85.8835	0.576522	0.697929	0.780973	0.870948	0.95309	0.352969
MS.gene02440	MsLAC101	0.768259	1.40338	1.38312	1.10476	0.291027	2.17969	0.744471	0.447263	0.436335	0.82625	0.538862	0.117414	1
MS.gene009922	MsLAC102	3.39165	5.23429	3.66289	7.67484	12.2504	4.99953	12.0724	0.365633	0.940853	0.0908274	0.00557896	0.420065	0.00331902
MS.gene009762	MsLAC103	15.328	9.84603	9.57594	9.32454	11.9861	11.0143	13.7153	0.257505	0.308242	0.305323	0.682422	0.468197	0.866055
MS.gene070066	MsLAC104	0.135981	0.25906	0.314537	0.398999	0.417605	0.131706	0	1	1	0.655151	0.633889	1	NA
MS.gene29699	MsLAC105	0	0.124997	0.114014	0.15253	0.287953	0.132946	1.8224	NA	NA	NA	0.511218	NA	0.0211615
MS.gene59385	MsLAC106	0	0	0.192984	0.291763	0.119884	0.265426	0.477585	NA	NA	0.500393	NA	0.582825	0.250523
MS.gene59387	MsLAC107	1.54665	2.55375	1.72881	2.73106	3.11474	4.68761	9.58315	0.449433	0.886135	0.424888	0.194273	0.0428058	0.000196971
MS.gene88734	MsLAC108	1.95596	2.30494	2.48304	5.38434	6.51333	2.92276	5.29864	0.905488	0.845754	0.117958	0.0604968	0.612569	0.0950501
MS.gene041990	MsLAC109	63.177	56.1084	41.1196	51.2168	70.8978	41.3323	93.7403	0.732614	0.268391	0.658882	0.687018	0.273225	0.258363
MS.gene80645	MsLAC110	0.135981	0	0	0	0	0	0	NA	NA	NA	NA	NA	NA
MS.gene94205	MsLAC111	2.29653	1.87599	1.62423	2.22483	2.84165	1.79968	11.7367	0.726659	0.658341	1	0.749926	0.719873	0.00114863
MS.gene94790	MsLAC112	50.9353	47.624	53.1888	24.8727	31.8497	27.1695	36.1127	0.87353	0.892213	0.138151	0.347523	0.146903	0.445739
MS.gene94791	MsLAC113	0	0	0	0	0	0	0	NA	NA	NA	NA	NA	NA
MS.gene99610	MsLAC114	2.09191	1.92474	1.12374	1.1911	1.35222	0.417335	0.799706	0.901449	0.411	0.446107	0.607316	0.043743	0.207166
MS.gene65188	MsLAC115	0.264927	0	0	0.290643	0.854888	0.422876	0.372757	NA	NA	1	0.177783	0.669521	1
MS.gene65111	MsLAC116	1.86229	3.2123	1.35844	4.1587	5.90922	3.44115	4.58889	0.340599	0.776282	0.121071	0.0421967	0.292591	0.0990466
MS.gene65109	MsLAC117	5.68678	7.37936	3.21569	6.53434	10.2899	5.45788	9.91046	0.530133	0.394288	0.756665	0.253517	0.960096	0.235403
MS.gene011006	MsLAC118	0.819446	0.544335	0.337521	0.254834	0.551315	0.780776	0.151045	0.804232	0.536198	0.564552	1	1	0.315218
MS.gene77227	MsLAC119	17.3916	24.8623	18.8549	25.9731	30.6155	18.3978	27.5876	0.336051	0.822918	0.268457	0.149441	0.815818	0.21364
MS.gene91701	MsLAC120	0	0.539571	0.503776	0.186055	0.581743	0.284957	0.175589	0.188943	0.274515	NA	0.13539	0.584199	NA
MS.gene46170	MsLAC121	0.138986	0.260773	0.372452	0.656081	0	0.313014	0.181916	1	0.656114	0.473192	NA	1	1
MS.gene46161	MsLAC122	2.97315	4.5713	1.86042	2.41887	2.299	0.246118	2.03092	0.450355	0.487101	0.861493	0.78033	0.00773217	0.531922
MS.gene46028	MsLAC123	0	0	0	0.172696	0.134068	0	0.139935	NA	NA	NA	NA	NA	NA
MS.gene46027	MsLAC124	38.6405	34.9087	36.0762	16.2627	25.5299	21.2853	29.5953	0.827103	0.931371	0.0634307	0.412512	0.186962	0.605074
MS.gene051251	MsLAC125	0	0	0	0	0	0	0	NA	NA	NA	NA	NA	NA
MS.gene23169	MsLAC126	1.18279	1.14614	0.842035	1.01905	0.776535	0.696929	0.307768	1	0.863332	1	0.69737	0.687216	0.232073
MS.gene84568	MsLAC127	21.5721	25.9433	25.0294	14.0116	27.6632	21.3299	25.151	0.645067	0.729664	0.390105	0.5397	0.958364	0.669956
MS.gene96844	MsLAC128	0.746047	1.08173	0.449497	0.340423	0.602269	0.953661	1.53875	0.837717	0.604924	0.585739	1	0.816968	0.420019
MS.gene96856	MsLAC129	0	0	0.190639	0.171197	0	0.299277	0	NA	NA	NA	NA	0.506273	NA
MS.gene64554	MsLAC130	0.682995	0.267169	0.259399	0.454109	0.417585	0.142478	0.63866	0.715276	0.717445	1	1	0.398537	1
MS.gene96583	MsLAC131	0.276953	0.260543	0	0.158967	0.444444	0	0.170757	1	0.567126	1	1	0.57017	1
MS.gene96581	MsLAC132	2.36911	2.58869	3.09455	2.80414	5.53575	3.39149	3.60424	0.918909	0.639839	0.769093	0.101307	0.43243	0.487672
MS.gene96577	MsLAC133	5.36036	9.59497	6.71248	7.11586	9.90939	6.82541	14.6644	0.131346	0.621073	0.469627	0.194279	0.552651	0.0184264
MS.gene051249	MsLAC134	0.156971	0	0	0	0.151586	0	0	NA	NA	NA	1	NA	NA
MS.gene051248	MsLAC135	0	0	0	0	0	0	0	NA	NA	NA	NA	NA	NA
MS.gene055124	MsLAC136	79.5893	69.3644	73.7041	30.6594	62.2763	48.1326	43.0005	0.706537	0.871048	0.0239507	0.639729	0.206573	0.117936
MS.gene055125	MsLAC137	0	0	0	0	0.119464	0	0	NA	NA	NA	NA	NA	NA
MS.gene055257	MsLAC138	2.5885	2.43892	2.73162	2.46811	1.0185	0.373579	2.88841	1	0.921508	1	0.140648	0.0175511	0.914722
MS.gene90316	MsLAC139	0.275673	1.21572	0.488754	0.440409	1.50355	1.11823	0.910314	0.141653	1	1	0.155783	0.296941	0.542793
MS.gene66061	MsLAC140	0.802673	0.264177	0.118825	0.304611	0.375489	0.134123	0	0.491045	0.261344	0.506414	0.78551	0.261535	0.0822727
MS.gene66063	MsLAC141	7.07108	9.64201	7.45563	12.7891	16.7552	8.69358	19.0486	0.474089	0.887142	0.184219	0.0778472	0.576034	0.0528932
MS.gene012654	MsLAC142	0	0	0	0	0	0	0	NA	NA	NA	NA	NA	NA
MS.gene62870	MsLAC143	92.0683	68.8696	47.996	21.6546	24.1448	13.5546	19.358	0.340976	0.0726286	0.000289087	0.000420539	8.11927e-07	7.20647e-06
MS.gene44958	MsLAC144	43.939	56.4308	41.6185	22.8545	15.0174	8.85786	7.01862	0.538787	0.890749	0.148499	0.0151425	0.00110464	7.6318e-05
MS.gene060530	MsLAC145	0	0	0	0	0	0	0	NA	NA	NA	NA	NA	NA
MS.gene011504	MsLAC146	0	0.479857	0	0.146594	0	0.123684	0	0.155238	NA	NA	NA	NA	NA
MS.gene011878	MsLAC147	25.0278	35.8657	33.0667	23.7615	12.5932	4.9095	6.7069	0.340489	0.504685	1	0.257305	0.000699255	0.00240365
MS.gene011879	MsLAC148	222.49	198.864	155.671	101.138	50.7106	28.0971	19.4946	0.770306	0.445994	0.103218	0.00325443	5.04427e-05	3.03152e-06
MS.gene067288	MsLAC149	0	0.261891	0.200015	0	0	0	0	0.500288	NA	NA	NA	NA	NA
MS.gene71912	MsLAC150	0	0	0	0	0	0	0	NA	NA	NA	NA	NA	NA
MS.gene87345	MsLAC151	0.808608	1.19136	1.22951	1.19242	0.428412	0.318639	0.182589	0.821161	0.649871	0.701611	0.754244	0.500568	0.269061
MS.gene87346	MsLAC152	49.2392	57.2244	40.7074	23.532	10.1326	7.66759	6.32715	0.702735	0.661743	0.0896115	0.000339971	1.52896e-05	3.33364e-06
MS.gene068376	MsLAC153	0.394797	0	0	0	0	0	0	0.267623	0.271354	0.276919	0.278625	0.266171	0.270281
MS.gene28549	MsLAC154	1.62774	0.5286	0.620595	0.124591	0.126088	0	0.147695	0.14627	0.250349	0.0459793	0.0325479	0.00696679	0.0429239
MS.gene28548	MsLAC155	43.5055	25.5737	31.4003	15.1145	5.2805	4.05513	4.7854	0.197435	0.474187	0.0360687	4.66014e-05	6.4752e-06	1.86411e-05
MS.gene84742	MsLAC156	0.255758	0.261891	0	0	0	0	0	1	NA	NA	NA	NA	NA
MS.gene88938	MsLAC5	4.1882	1.71727	5.0555	1.54204	1.49715	0.456532	0.770521	0.18545	0.653567	0.233493	0.208213	0.01527	0.0620827
MS.gene88984	MsLAC7	206.748	131.799	94.6531	113.972	45.3374	21.6661	57.1984	0.301454	0.0874356	0.313022	0.00499998	4.32914e-06	0.0054631
MS.gene79849	MsLAC21	0.274435	0.90541	0.963676	2.52098	1.24904	0.661285	3.48905	0.41057	0.325185	0.0686197	0.182985	0.765631	0.0414692
MS.gene25900	MsLAC28	1.90463	1.89977	1.99309	0.293309	0.255772	0.129147	0.338945	1	1	0.0451907	0.0439062	0.015765	0.0566039
MS.gene014367	MsLAC35	3.16952	10.2935	6.75858	7.49909	6.81307	4.35192	1.85835	0.0103178	0.135698	0.174033	0.1521	0.542613	0.336432
MS.gene009433	MsLAC46	0.86919	1.12001	0.566114	0.55277	0.35344	0.382914	0	0.822894	0.798727	0.779999	0.594737	0.55534	0.0398763
MS.gene074403	MsLAC49	8.43846	1.50421	1.42927	1.75203	2.90217	0.129147	0.523572	0.0412447	0.0422228	0.076853	0.276837	0.000369604	0.00470998
MS.gene003390	MsLAC59	2.81246	2.88871	1.8399	1.04359	1.71176	0.494951	1.48809	1	0.464138	0.1952	0.508272	0.0187476	0.321583
MS.gene41139	MsLAC60	0	0.244521	0.110136	0	0.675919	1.01918	1.18636	0.500288	NA	NA	0.124977	0.0650705	0.0187286
MS.gene70354	MsLAC64	32.9911	25.3034	57.5458	20.8306	20.8048	5.56358	5.66607	0.530859	0.186979	0.367627	0.425045	0.000209766	0.00267241
MS.gene052289	MsLAC68	49.7197	39.2199	64.302	43.4633	40.8308	12.7638	39.0431	0.510206	0.45122	0.826151	0.716859	0.000217122	0.54944
MS.gene030765	MsLAC72	1.29959	1.96669	2.62281	2.21058	0.538017	0	0.332483	0.76072	0.476371	0.567689	0.505609	0.0490229	0.236357
MS.gene28940	MsLAC81	14.0979	9.73791	10.7462	5.75892	6.94843	0.828428	14.1468	0.383421	0.55381	0.0520829	0.123765	4.81133e-07	0.94843
MS.gene021147	MsLAC82	0.513398	0.602039	0.804802	0.523948	2.07389	1.80549	4.09156	1	0.842386	1	0.181169	0.194631	0.0114805
MS.gene048082	MsLAC84	3.69557	0.87287	4.18282	2.54089	4.21495	2.19509	0.311839	0.0994894	0.829346	0.778188	0.715409	0.618985	0.0235236
MS.gene44858	MsLAC96	2.91522	3.84003	4.7017	6.8662	12.2454	2.58482	5.60667	0.705946	0.453375	0.121494	0.0120031	0.927423	0.258326
MS.gene76101	MsLAC98	0.403581	0.256643	1.02508	0.965238	1.89574	1.00976	5.49049	1	0.457232	0.467101	0.0821862	0.441711	0.000612806
MS.gene009922	MsLAC102	3.39165	5.23429	3.66289	7.67484	12.2504	4.99953	12.0724	0.365633	0.940853	0.0908274	0.00557896	0.420065	0.00331902
MS.gene29699	MsLAC105	0	0.124997	0.114014	0.15253	0.287953	0.132946	1.8224	NA	NA	NA	0.511218	NA	0.0211615
MS.gene59387	MsLAC107	1.54665	2.55375	1.72881	2.73106	3.11474	4.68761	9.58315	0.449433	0.886135	0.424888	0.194273	0.0428058	0.000196971
MS.gene94205	MsLAC111	2.29653	1.87599	1.62423	2.22483	2.84165	1.79968	11.7367	0.726659	0.658341	1	0.749926	0.719873	0.00114863
MS.gene99610	MsLAC114	2.09191	1.92474	1.12374	1.1911	1.35222	0.417335	0.799706	0.901449	0.411	0.446107	0.607316	0.043743	0.207166
MS.gene65111	MsLAC116	1.86229	3.2123	1.35844	4.1587	5.90922	3.44115	4.58889	0.340599	0.776282	0.121071	0.0421967	0.292591	0.0990466
MS.gene46161	MsLAC122	2.97315	4.5713	1.86042	2.41887	2.299	0.246118	2.03092	0.450355	0.487101	0.861493	0.78033	0.00773217	0.531922
MS.gene96577	MsLAC133	5.36036	9.59497	6.71248	7.11586	9.90939	6.82541	14.6644	0.131346	0.621073	0.469627	0.194279	0.552651	0.0184264
MS.gene055124	MsLAC136	79.5893	69.3644	73.7041	30.6594	62.2763	48.1326	43.0005	0.706537	0.871048	0.0239507	0.639729	0.206573	0.117936
MS.gene055257	MsLAC138	2.5885	2.43892	2.73162	2.46811	1.0185	0.373579	2.88841	1	0.921508	1	0.140648	0.0175511	0.914722
MS.gene62870	MsLAC143	92.0683	68.8696	47.996	21.6546	24.1448	13.5546	19.358	0.340976	0.0726286	0.000289087	0.000420539	8.11927e-07	7.20647e-06
MS.gene44958	MsLAC144	43.939	56.4308	41.6185	22.8545	15.0174	8.85786	7.01862	0.538787	0.890749	0.148499	0.0151425	0.00110464	7.6318e-05
MS.gene011878	MsLAC147	25.0278	35.8657	33.0667	23.7615	12.5932	4.9095	6.7069	0.340489	0.504685	1	0.257305	0.000699255	0.00240365
MS.gene011879	MsLAC148	222.49	198.864	155.671	101.138	50.7106	28.0971	19.4946	0.770306	0.445994	0.103218	0.00325443	5.04427e-05	3.03152e-06
MS.gene87346	MsLAC152	49.2392	57.2244	40.7074	23.532	10.1326	7.66759	6.32715	0.702735	0.661743	0.0896115	0.000339971	1.52896e-05	3.33364e-06
MS.gene28549	MsLAC154	1.62774	0.5286	0.620595	0.124591	0.126088	0	0.147695	0.14627	0.250349	0.0459793	0.0325479	0.00696679	0.0429239
MS.gene28548	MsLAC155	43.5055	25.5737	31.4003	15.1145	5.2805	4.05513	4.7854	0.197435	0.474187	0.0360687	4.66014e-05	6.4752e-06	1.86411e-05

## Sheet: LAC冷
Table S6 data under different stresses
gene_id		CK	C1	C2	C3	C4	C1vsCK_pvalue	C2vsCK_pvalue	C3vsCK_pvalue	C4vsCK_pvalue
MS.gene27107	MsLAC1	0	0	0	0	0	NA	NA	NA	NA
MS.gene24091	MsLAC2	0	0	0	0	0	NA	NA	NA	NA
MS.gene040767	MsLAC3	0	0	0	0	0	NA	NA	NA	NA
MS.gene005761	MsLAC4	0.165126	0.146544	0.150305	0.145976	0.228149	1	1	1	1
MS.gene88938	MsLAC5	0.344849	2.35394	1.30912	0.989517	0.843494	0.0936587	0.337129	0.414244	0.633463
MS.gene68428	MsLAC6	0	0	0	0	0	NA	NA	NA	NA
MS.gene88984	MsLAC7	65.0165	51.8791	60.4707	68.2713	37.5495	0.593943	0.940091	0.799495	0.252072
MS.gene21407	MsLAC8	0	0	0	0.168137	0	NA	NA	NA	NA
MS.gene35833	MsLAC9	0	0.233771	0	0.168449	0.369068	0.579838	NA	NA	0.509658
MS.gene01142	MsLAC10	0	0	0	0	0	NA	NA	NA	NA
MS.gene059311	MsLAC11	0	0	0.466337	0.474998	0.290466	NA	0.2952	0.289791	0.507118
MS.gene002173	MsLAC12	0	0	0	0	0	NA	NA	NA	NA
MS.gene047086	MsLAC13	0	0	0	0	0	NA	NA	NA	NA
MS.gene034345	MsLAC14	0	0	0	0	0	NA	NA	NA	NA
MS.gene071950	MsLAC15	0	0	0	0	0	NA	NA	NA	NA
MS.gene84361	MsLAC16	0.840007	0.999154	1.31604	0	0.146816	1	0.533712	0.0497943	0.195231
MS.gene04575	MsLAC17	7.92066	5.11327	7.64226	8.15645	9.49489	0.349859	1	0.892485	0.781136
MS.gene70576	MsLAC18	0	0	0	0	0	NA	NA	NA	NA
MS.gene70575	MsLAC19	0	0	0	0	0	NA	NA	NA	NA
MS.gene70574	MsLAC20	0	0	0	0	0	NA	NA	NA	NA
MS.gene79849	MsLAC21	3.74642	2.81751	4.31454	9.40737	2.85256	0.659524	0.836223	0.0861361	0.717379
MS.gene48502	MsLAC22	0	0	0	0	0	NA	NA	NA	NA
MS.gene48504	MsLAC23	0	0	0	0	0	NA	NA	NA	NA
MS.gene52790	MsLAC24	0	0	0	0	0	NA	NA	NA	NA
MS.gene058407	MsLAC25	0.18444	0	0.143958	0	0	NA	1	NA	NA
MS.gene05606	MsLAC26	4.22351	4.72265	4.66351	3.80859	4.77933	0.886544	0.869948	0.930034	0.876687
MS.gene039999	MsLAC27	0	0.11054	0	0	0.122481	NA	NA	NA	NA
MS.gene25900	MsLAC28	0.846727	1.26417	0.493457	0.306945	0.382112	0.680315	0.763581	0.497822	0.513813
MS.gene25899	MsLAC29	0	0	0	0	0.151157	NA	NA	NA	NA
MS.gene25898	MsLAC30	0	0	0	0	0	NA	NA	NA	NA
MS.gene77483	MsLAC31	0	0.11476	0.154951	0	0.127157	NA	NA	NA	NA
MS.gene77484	MsLAC32	0.136076	0	0.201203	0.489266	0.160656	NA	1	0.668132	1
MS.gene012985	MsLAC33	0	0	0	0	0	NA	NA	NA	NA
MS.gene012984	MsLAC34	0	0	0.151538	0	0	NA	NA	NA	NA
MS.gene014367	MsLAC35	14.0334	12.2556	7.96561	9.98848	6.43395	0.745874	0.23229	0.504854	0.0841328
MS.gene04051	MsLAC36	8.77156	7.65048	7.38228	12.5575	10.3041	0.774306	0.845218	0.303361	0.787157
MS.gene007998	MsLAC37	1.62534	1.01561	2.14769	1.41472	1.83301	0.607225	0.696696	1	1
MS.gene022247	MsLAC38	0	0.127203	0	0.146234	1.59986	NA	NA	NA	0.111877
MS.gene022246	MsLAC39	0	0.269718	0.296427	0.428602	0.49776	0.500335	0.603996	0.250503	0.250668
MS.gene022245	MsLAC40	0.156044	0	0	0	0	NA	NA	NA	NA
MS.gene75721	MsLAC41	0	0	0	0	0	NA	NA	NA	NA
MS.gene75720	MsLAC42	0.133607	0	0.147688	0.480386	0.157741	NA	1	0.668136	1
MS.gene38718	MsLAC43	0	0	0	0	0	NA	NA	NA	NA
MS.gene38717	MsLAC44	0	0	0	0.126682	0	NA	NA	NA	NA
MS.gene69347	MsLAC45	0	8.33856	0	0	0	0.00190104	NA	NA	NA
MS.gene009433	MsLAC46	0.188581	0.252519	0.14719	0.428852	0.241577	1	1	0.740443	1
MS.gene04460	MsLAC47	9.1784	6.22721	8.51226	5.22365	9.8709	0.34533	0.963624	0.241741	0.903169
MS.gene031917	MsLAC48	0	0	0	0	0	NA	NA	NA	NA
MS.gene074403	MsLAC49	0.957154	2.12365	1.58151	2.4957	0.457103	0.450776	0.728209	0.265489	0.701041
MS.gene074404	MsLAC50	0.12803	0	0	0.31639	0	NA	NA	1	NA
MS.gene045406	MsLAC51	0	0.151074	0	0.165386	0	NA	NA	NA	NA
MS.gene045405	MsLAC52	0	0	0	0	0	NA	NA	NA	NA
MS.gene054639	MsLAC53	0	0	0	0	0	NA	NA	NA	NA
MS.gene054640	MsLAC54	0	0	0	0	0	NA	NA	NA	NA
MS.gene064814	MsLAC55	0	1.04055	0.149314	1.38185	0.159477	0.0963371	NA	0.0518326	NA
MS.gene006862	MsLAC56	0	0	0	0	0	NA	NA	NA	NA
MS.gene006860	MsLAC57	0	0	0	0	0	NA	NA	NA	NA
MS.gene006859	MsLAC58	0	0	0	0	0	NA	NA	NA	NA
MS.gene003390	MsLAC59	0.573536	0.3644	1.55025	1.02466	0.57666	0.736517	0.381481	0.431419	1
MS.gene41139	MsLAC60	0.284428	0.72333	0.421726	1.55284	0.695758	0.500456	1	0.0520601	0.747532
MS.gene61580	MsLAC61	2.10919	2.56669	2.81136	1.13522	1.03051	0.807122	0.652231	0.448418	0.399625
MS.gene73256	MsLAC62	0	0	0	0	0	NA	NA	NA	NA
MS.gene037429	MsLAC63	7.07593	8.66278	4.55027	7.84178	5.97615	0.697326	0.462175	0.771488	0.747796
MS.gene70354	MsLAC64	18.4734	19.8666	41.4638	23.0413	23.081	0.945911	0.0783029	0.514934	0.641034
MS.gene82393	MsLAC65	0	0	0	0	0	NA	NA	NA	NA
MS.gene82389	MsLAC66	0	0	0	0	0	NA	NA	NA	NA
MS.gene82388	MsLAC67	0	0	0	0	0	NA	NA	NA	NA
MS.gene052289	MsLAC68	22.8163	24.5586	22.5966	12.1349	12.5594	0.880224	0.983156	0.113938	0.131768
MS.gene92589	MsLAC69	0.816984	0.761626	2.51779	0.866685	1.27273	1	0.163026	1	0.726496
MS.gene89907	MsLAC70	0.695512	0.148908	0	0	0	0.336551	0.207456	0.132948	0.211747
MS.gene059697	MsLAC71	0	0	0	0	0	NA	NA	NA	NA
MS.gene030765	MsLAC72	0.997138	0.775572	1.3093	1.53984	0.973849	0.828157	0.741051	0.63889	1
MS.gene059690	MsLAC73	0.671662	0	0	0	0.349056	0.506537	0.502508	0.503524	1
MS.gene004011	MsLAC74	0.534827	0.352232	0	0.278363	0.266754	1	0.18494	0.730691	0.739076
MS.gene95576	MsLAC75	1.9937	2.32427	1.54544	0.438577	1.27051	1	0.88918	0.0975007	0.518304
MS.gene037658	MsLAC76	0	0	0	0.144448	0	NA	NA	NA	NA
MS.gene33479	MsLAC77	2.45794	3.60945	1.62967	1.93312	1.61774	0.511559	0.558311	0.792164	0.597986
MS.gene56463	MsLAC78	0	0	0	0	0	NA	NA	NA	NA
MS.gene56466	MsLAC79	0	0	0	0.133914	0.238233	NA	NA	NA	NA
MS.gene56467	MsLAC80	0	0	0	0	0	NA	NA	NA	NA
MS.gene28940	MsLAC81	5.51653	4.65063	4.77746	1.24047	2.44708	0.715374	0.839433	0.0116697	0.147292
MS.gene021147	MsLAC82	2.48002	2.02868	0.705058	2.90601	1.85351	0.820295	0.102476	0.822876	0.637259
MS.gene027389	MsLAC83	1.97577	1.47386	0.566525	2.27416	2.02537	0.746647	0.192254	0.883337	1
MS.gene048082	MsLAC84	1.39297	2.38126	3.26815	1.0854	1.19866	0.446802	0.218718	0.861239	1
MS.gene052753	MsLAC85	5.14966	5.54632	4.39566	2.66513	3.37748	0.952849	0.898245	0.322944	0.462648
MS.gene010528	MsLAC86	0.719762	0.658366	0.601219	0.598355	0.228149	1	1	1	0.333172
MS.gene010533	MsLAC87	0	0	0	0	0	NA	NA	NA	NA
MS.gene43755	MsLAC88	0.167489	1.02241	0.340299	0.845771	0.66749	0.102773	1	0.231856	0.419019
MS.gene35871	MsLAC89	1.71602	3.6275	1.9419	3.1878	2.90703	0.186395	0.892989	0.302012	0.48145
MS.gene56689	MsLAC90	0.156655	0.556081	0.116752	0.234832	0.611312	0.361169	1	1	0.271736
MS.gene51086	MsLAC91	0.518432	0.111124	0	0.160145	0.246255	0.548223	0.418954	0.736839	1
MS.gene041141	MsLAC92	1.17055	2.26021	1.33117	2.46665	1.79328	0.407952	1	0.247722	0.618765
MS.gene010526	MsLAC93	0	0	0	0	0	NA	NA	NA	NA
MS.gene02463	MsLAC94	0	0	0	0	0	NA	NA	NA	NA
MS.gene64676	MsLAC95	0	0	0	0	0	NA	NA	NA	NA
MS.gene44858	MsLAC96	2.51631	2.9027	0.741635	0.7843	0.466449	0.916697	0.152658	0.125584	0.0816366
MS.gene50248	MsLAC97	16.7795	15.212	18.6841	21.8886	25.4486	0.813337	0.802717	0.483514	0.406986
MS.gene76101	MsLAC98	1.02117	0.625859	0.636054	1.01153	1.50749	0.658135	0.788543	1	0.729073
MS.gene047683	MsLAC99	2.53909	5.14579	3.74771	2.75807	4.65304	0.231009	0.505808	0.836687	0.363717
MS.gene02442	MsLAC100	86.2801	101.827	53.2657	40.238	34.8343	0.634197	0.178057	0.0298113	0.0183164
MS.gene02440	MsLAC101	0.694071	0.597088	0.938206	0.535435	0.633716	1	0.801444	1	1
MS.gene009922	MsLAC102	5.18863	3.59606	1.51365	2.76865	0.716669	0.399099	0.0222328	0.242016	0.00239393
MS.gene009762	MsLAC103	2.42493	2.57701	2.53689	5.86887	2.77492	1	1	0.0886173	0.923604
MS.gene070066	MsLAC104	0.727312	1.84585	1.43248	0.706084	0.611116	0.256882	0.394632	1	1
MS.gene29699	MsLAC105	0	0.146286	0	0.419458	0.276147	NA	NA	0.298138	0.506757
MS.gene59385	MsLAC106	0	0.827204	0.776887	0.287658	0.122911	0.0647441	0.0702936	0.500335	NA
MS.gene59387	MsLAC107	1.31693	0.900702	1.08985	1.51318	1.83352	0.704856	1	0.863488	0.752926
MS.gene88734	MsLAC108	0.722107	1.61874	1.02778	0.636234	0.37533	0.351414	0.805472	1	0.774082
MS.gene041990	MsLAC109	14.5337	28.8711	15.515	18.465	14.8196	0.129564	0.872317	0.499236	1
MS.gene80645	MsLAC110	0.638732	0	0.307109	0.131019	0	0.209259	0.772988	0.484359	0.220208
MS.gene94205	MsLAC111	1.49961	3.62901	1.90989	1.93762	3.46321	0.319843	0.690079	0.810015	0.219977
MS.gene94790	MsLAC112	20.3276	14.2015	17.3122	7.28546	3.615	0.285804	0.705563	0.0305824	0.000312995
MS.gene94791	MsLAC113	0	0	0	0	0	NA	NA	NA	NA
MS.gene99610	MsLAC114	1.70804	2.37178	1.1487	0.459405	1.28831	0.711579	0.747445	0.125284	0.746386
MS.gene65188	MsLAC115	3.95816	1.84129	0.782215	0.789278	0.935889	0.153868	0.0183239	0.0179656	0.0222273
MS.gene65111	MsLAC116	4.26382	4.19451	3.64609	2.75756	2.96336	1	0.794987	0.49736	0.533022
MS.gene65109	MsLAC117	9.49322	8.60202	8.9087	5.53289	7.29814	0.768979	0.965483	0.269277	0.565831
MS.gene011006	MsLAC118	0.455314	0.940105	1.004	0.274916	0.869644	0.583383	0.591441	1	0.775171
MS.gene77227	MsLAC119	44.4885	27.7854	27.1559	26.8445	29.3832	0.17263	0.240131	0.201001	0.310871
MS.gene91701	MsLAC120	0.900519	2.15671	0.519717	1.08615	2.01593	0.259307	0.781937	0.826398	0.307142
MS.gene46170	MsLAC121	0.480424	0.497662	0	0.133914	0	1	0.304546	0.67169	0.306873
MS.gene46161	MsLAC122	2.042	3.42526	3.24604	1.09467	0.499536	0.370708	0.411679	0.451597	0.094004
MS.gene46028	MsLAC123	0	0.11054	0	0	0	NA	NA	NA	NA
MS.gene46027	MsLAC124	15.9637	14.4403	12.6316	5.84586	2.90499	0.801102	0.653126	0.077292	0.00433455
MS.gene051251	MsLAC125	0	0	0	0	0	NA	NA	NA	NA
MS.gene23169	MsLAC126	0.753856	0.612887	1.42833	0.406048	0.279095	1	0.504022	0.75713	0.506803
MS.gene84568	MsLAC127	10.7989	8.77565	4.91379	7.02373	0.887336	0.668547	0.121577	0.494589	0.000185101
MS.gene96844	MsLAC128	1.31753	1.19875	0.783968	0.877427	0.335516	1	0.577018	0.745543	0.216629
MS.gene96856	MsLAC129	0.127808	0.219161	0.141278	0	0	1	1	NA	NA
MS.gene64554	MsLAC130	2.28391	3.12432	0.366177	0.567763	1.01979	0.6537	0.0364767	0.144753	0.35376
MS.gene96583	MsLAC131	1.25603	0.853693	1.54255	0.133423	0.287801	0.699284	0.746698	0.0717296	0.185034
MS.gene96581	MsLAC132	5.54577	6.18103	5.09787	3.37017	2.40465	0.844855	1	0.420998	0.129141
MS.gene96577	MsLAC133	11.9806	13.0732	8.97679	8.87985	8.92491	0.88624	0.529243	0.520929	0.501183
MS.gene051249	MsLAC134	0.163594	0	0	0.202138	0	NA	NA	1	NA
MS.gene051248	MsLAC135	0	0	0	0	0	NA	NA	NA	NA
MS.gene055124	MsLAC136	28.6626	29.7305	23.7376	11.1056	5.77242	0.978991	0.678319	0.0470872	0.00128366
MS.gene055125	MsLAC137	0	0	0	0	0	NA	NA	NA	NA
MS.gene055257	MsLAC138	2.22585	2.54538	2.96724	1.73473	0.725868	0.918042	0.629971	0.813807	0.168045
MS.gene90316	MsLAC139	7.5714	5.61551	2.53223	3.26639	3.81219	0.441918	0.0296496	0.101982	0.191054
MS.gene66061	MsLAC140	2.88058	4.93302	1.47994	2.29104	0.890841	0.392672	0.352355	0.823114	0.106545
MS.gene66063	MsLAC141	23.5312	11.7229	10.1759	14.5621	10.9768	0.06762	0.0495991	0.253272	0.0851192
MS.gene012654	MsLAC142	0	0	0	0	0	NA	NA	NA	NA
MS.gene62870	MsLAC143	63.3305	53.2423	59.1219	37.0107	36.2078	0.540922	0.922376	0.133551	0.122327
MS.gene44958	MsLAC144	6.75142	8.68592	3.74237	4.96178	4.97835	0.636523	0.305812	0.617748	0.591087
MS.gene060530	MsLAC145	0.518254	0.381479	0	0	0.274216	1	0.296766	0.296675	1
MS.gene011504	MsLAC146	0	0.365467	0.321873	0.140048	0.412465	0.427274	0.501332	NA	0.306193
MS.gene011878	MsLAC147	191.403	278.77	180.472	241.92	85.9125	0.369721	0.977395	0.494235	0.0652762
MS.gene011879	MsLAC148	36.8074	33.1776	35.7674	29.4679	31.1357	0.772051	0.991978	0.688552	0.732515
MS.gene067288	MsLAC149	0.67406	0.459878	0.155233	0.132451	0.127389	0.791358	0.408678	0.404702	0.414611
MS.gene71912	MsLAC150	0	0	0	0	0	NA	NA	NA	NA
MS.gene87345	MsLAC151	5.75212	10.1446	5.51754	5.71619	1.83372	0.240479	1	0.948436	0.0512001
MS.gene87346	MsLAC152	6.30283	7.10305	10.5692	7.6436	7.11799	0.863968	0.370424	0.656505	0.893126
MS.gene068376	MsLAC153	0.134094	0.377254	0.769158	0.283213	0.363018	0.667207	0.355582	1	1
MS.gene28549	MsLAC154	2.15575	5.12219	1.4401	3.25228	1.54379	0.172723	0.660891	0.429238	0.682384
MS.gene28548	MsLAC155	4.52048	6.48478	4.60551	3.55856	3.65321	0.556642	1	0.757295	0.769576
MS.gene84742	MsLAC156	0	0.282491	0.444678	0.150762	0.490406	0.500335	0.432056	NA	0.286058
gene_id	gene_id	CK	C1	C2	C3	C4	C1vsCK_pvalue	C2vsCK_pvalue	C3vsCK_pvalue	C4vsCK_pvalue
MS.gene84361	MsLAC16	0.840007	0.999154	1.31604	0	0.146816	1	0.533712	0.0497943	0.195231
MS.gene69347	MsLAC45	0	8.33856	0	0	0	0.00190104	NA	NA	NA
MS.gene28940	MsLAC81	5.51653	4.65063	4.77746	1.24047	2.44708	0.715374	0.839433	0.0116697	0.147292
MS.gene02442	MsLAC100	86.2801	101.827	53.2657	40.238	34.8343	0.634197	0.178057	0.0298113	0.0183164
MS.gene009922	MsLAC102	5.18863	3.59606	1.51365	2.76865	0.716669	0.399099	0.0222328	0.242016	0.00239393
MS.gene94790	MsLAC112	20.3276	14.2015	17.3122	7.28546	3.615	0.285804	0.705563	0.0305824	0.000312995
MS.gene65188	MsLAC115	3.95816	1.84129	0.782215	0.789278	0.935889	0.153868	0.0183239	0.0179656	0.0222273
MS.gene46027	MsLAC124	15.9637	14.4403	12.6316	5.84586	2.90499	0.801102	0.653126	0.077292	0.00433455
MS.gene84568	MsLAC127	10.7989	8.77565	4.91379	7.02373	0.887336	0.668547	0.121577	0.494589	0.000185101
MS.gene64554	MsLAC130	2.28391	3.12432	0.366177	0.567763	1.01979	0.6537	0.0364767	0.144753	0.35376
MS.gene055124	MsLAC136	28.6626	29.7305	23.7376	11.1056	5.77242	0.978991	0.678319	0.0470872	0.00128366
MS.gene90316	MsLAC139	7.5714	5.61551	2.53223	3.26639	3.81219	0.441918	0.0296496	0.101982	0.191054
MS.gene66063	MsLAC141	23.5312	11.7229	10.1759	14.5621	10.9768	0.06762	0.0495991	0.253272	0.0851192
