# Supplementary material
Source: Research Square preprint supplement (doi:10.21203/rs.3.rs-9789181/v1)
Supplement: Supplementary file 4 [file a445e5edbedc48bb15fdc50b.xlsx]

## Sheet: Sheet1
Table S5 different tissue expression data
Gene ID	gene_id	ES	FL	LE	NO	PE	RO
MS.gene27107.t1	MsLAC1	0.0879152	0.252258	0	0	0.137322	0.178401
MS.gene24091.t1	MsLAC2	0.092986	0.111542	0	0	0	0.0778273
MS.gene040767.t1	MsLAC3	0.0936651	0.149919	0	0	0.279648	0
MS.gene005761.t1	MsLAC4	0	0	0	0.310567	0	0
MS.gene88938.t1	MsLAC5	6.23397	4.77571	0	4.04595	2.07706	4.77401
MS.gene68428.t1	MsLAC6	0	0	0	0	0	0
MS.gene88984.t1	MsLAC7	29.5129	15.0124	0.151746	9.1992	6.29808	27.0331
MS.gene21407.t1	MsLAC8	0	0	0	0	0	0
MS.gene35833.t1	MsLAC9	0.734195	0.112161	0.476414	0	0.138085	0.671822
MS.gene01142.t1	MsLAC11	0.265211	0.236974	0.158805	0.100353	0	0.414171
MS.gene059311.t1	MsLAC14	0	0.141498	0	0	0	0.181452
MS.gene002173.t1	MsLAC16	0	1.39613	0.562412	1.51474	0.974178	1.50237
MS.gene047086.t1	MsLAC17	18.435	1.06428	0.746277	0.806947	22.985	13.6127
MS.gene034345.t1	MsLAC19	0.264815	0.216609	0	0.895226	0.12968	1.17665
MS.gene071950.t1	MsLAC20	0	0.228293	0	0	0	0
MS.gene84361.t1	MsLAC21	0.928809	420.841	0.465565	0	3.91865	0.764969
MS.gene04575.t1	MsLAC24	2.29523	0.78933	0	0	1.48076	0.345181
MS.gene70576.t1	MsLAC25	0.0912823	0	0.146675	0.274615	0.240755	0.236899
MS.gene70575.t1	MsLAC26	5.83516	0.337873	0.303278	0.412692	5.63368	3.24342
MS.gene70574.t1	MsLAC27	0.17203	0	0	0	0.629808	0.0858005
MS.gene79849.t1	MsLAC28	0	0.107009	0	0	0	0
MS.gene48502.t1	MsLAC29	0	0	0	0	0	0.0852036
MS.gene48504.t1	MsLAC31	0.899445	117.845	0.313793	0.0985284	0.271149	0
MS.gene52790.t1	MsLAC32	0	33.5316	0	0	0.269556	0
MS.gene058407.t1	MsLAC35	45.508	7.36037	1.07064	1.83831	15.1298	10.9102
MS.gene05606.t1	MsLAC36	10.8476	0.605618	0.295333	0.594278	8.84625	6.51924
MS.gene039999.t1	MsLAC37	0.195087	0	0	0	1.30423	0
MS.gene25900.t1	MsLAC38	0.27389	0.46206	0	0.197196	0.131742	0.171151
MS.gene25899.t1	MsLAC39	0	0.105334	0	0.19411	0	0.168472
MS.gene25898.t1	MsLAC41	0	0.342787	0	0	0	0
MS.gene77483.t1	MsLAC42	0	18.7939	0	0	1.2649	0
MS.gene77484.t1	MsLAC45	3.67558	0.894195	0.159324	0.260984	3.17056	0.763822
MS.gene012985.t1	MsLAC46	0	0.242473	0	0.245659	0.12308	0.084615
MS.gene012984.t1	MsLAC47	9.56346	1.22348	0.596681	0.449136	15.2284	7.90923
MS.gene014367.t1	MsLAC48	0.55541	0	0	0	5.5416	0
MS.gene04051.t1	MsLAC49	0.617529	0.575104	0.298992	0.442787	0.125907	1.49475
MS.gene007998.t1	MsLAC50	0	0	0	0	0	1.36274
MS.gene022247.t1	MsLAC51	0	39.0442	0	0	0	0.0768368
MS.gene022246.t1	MsLAC52	0	3.87321	0	0	0	0
MS.gene022245.t1	MsLAC55	0.733969	0	0	0	0	0
MS.gene75721.t1	MsLAC56	0	0.258548	0	0	0	0
MS.gene75720.t1	MsLAC57	0	0.223084	0	0	0	0
MS.gene38718.t1	MsLAC58	0	2.71648	0	0	0	0
MS.gene38717.t1	MsLAC59	2.69972	1.30693	0	0.39846	1.46527	5.3046
MS.gene69347.t1	MsLAC60	2.45816	0.103005	0.145841	0.0921609	3.59895	2.53283
MS.gene009433.t1	MsLAC61	7.16791	1.69303	0	0.207074	1.35891	1.26567
MS.gene04460.t1	MsLAC63	25.7514	2.89448	1.05557	0.194232	238.133	14.2412
MS.gene031917.t1	MsLAC64	0.637142	10.2138	9.1569	12.997	0.875997	118.027
MS.gene074403.t1	MsLAC66	0	0.494213	0	0	0	0
MS.gene074404.t1	MsLAC68	5.75818	7.71933	1.38567	1.90392	6.22681	19.278
MS.gene045406.t1	MsLAC69	0	0	0.149659	0	0	0.390318
MS.gene045405.t1	MsLAC70	2.7274	0	0.45889	0	17.8025	2.13676
MS.gene054639.t1	MsLAC72	0	0	0.297243	0.193437	0.702428	1.55947
MS.gene054640.t1	MsLAC73	0	0	0	0.353598	0	1.26021
MS.gene064814.t1	MsLAC74	0.0858698	0	0	0	0	0.0718711
MS.gene006862.t1	MsLAC75	8.75624	1.59104	0	0.207074	2.5075	1.40033
MS.gene006860.t1	MsLAC76	0	0	0.143801	0	0	0.240871
MS.gene006859.t1	MsLAC77	7.14305	0.721576	1.50922	0.200382	62.6959	3.79053
MS.gene003390.t1	MsLAC79	0	95.5179	0	0	0	0.0902248
MS.gene41139.t1	MsLAC81	1.8455	2.49109	0	0.19923	2.94928	5.62233
MS.gene61580.t1	MsLAC82	0.081187	0	0	0	0.126813	0
MS.gene73256.t1	MsLAC83	3.10317	0.252637	0	0.226395	0.756247	0.270816
MS.gene037429.t1	MsLAC84	0	0.105702	1.1776	1.3589	0.130133	3.41255
MS.gene70354.t1	MsLAC85	0.374661	0	0	0	7.56371	0.0877994
MS.gene82393.t1	MsLAC86	0.370115	0	0.451606	0	0.846326	0.319915
MS.gene82389.t1	MsLAC88	6.29538	2.75151	0.153407	1.25384	15.1619	3.24494
MS.gene82388.t1	MsLAC89	0	0	0	0.96129	0	2.1426
MS.gene052289.t1	MsLAC90	2.64932	0.109625	2.545	0	6.36204	4.66244
MS.gene92589.t1	MsLAC91	0.0888933	0	0	0	1.4896	0.0862537
MS.gene89907.t1	MsLAC92	33.14	14.9751	0.152872	4.72293	14.5386	24.8026
MS.gene059697.t1	MsLAC96	6.17617	1.69525	0.147402	0.708562	11.1384	3.26578
MS.gene030765.t1	MsLAC97	0	2.90523	0	14.9865	2.48914	35.8768
MS.gene059690.t1	MsLAC98	1.9112	0	0.15478	0.198954	6.95578	0.94268
MS.gene004011.t1	MsLAC99	9.10083	4.11906	0	1.08019	4.46776	6.1673
MS.gene95576.t1	MsLAC100	90.1334	12.4187	6.57508	3.44986	57.9272	54.7607
MS.gene037658.t1	MsLAC101	0.362196	0	0	0	0	1.56257
MS.gene33479.t1	MsLAC102	2.16788	0.553967	0.155334	0.48471	1.57707	1.09128
MS.gene56463.t1	MsLAC103	0.0964984	3.77657	0	2.27974	0.387666	5.67963
MS.gene56466.t1	MsLAC104	0.365333	0	0.156453	0	0	0.493256
MS.gene56467.t1	MsLAC105	1.18339	0	0	0	3.48056	0.664466
MS.gene28940.t1	MsLAC107	0.79671	0	0	0	0.265359	1.15867
MS.gene021147.t1	MsLAC108	1.091	0.216698	0	0.399331	2.48769	0.569407
MS.gene027389.t1	MsLAC109	0	14.438	0.155056	11.0514	3.59466	34.4158
MS.gene048082.t1	MsLAC110	0.181951	0	0	0	0	0.314703
MS.gene052753.t1	MsLAC111	12.7309	3.05352	0.290133	0.852345	61.0264	4.17013
MS.gene010528.t1	MsLAC112	0	0.105702	0.586919	3.47378	0	16.7771
MS.gene010533.t1	MsLAC113	0	0	0	0	0	5.40498
MS.gene43755.t1	MsLAC114	16.1788	0.419361	0.567983	0.279131	47.5164	2.81458
MS.gene35871.t1	MsLAC115	12.5184	0.114278	0.161801	0	5.46773	0.44319
MS.gene56689.t1	MsLAC116	14.7383	2.36078	1.02142	0.244813	8.27396	2.49252
MS.gene51086.t1	MsLAC117	13.1538	0.943036	2.33432	0.570752	14.0251	3.00047
MS.gene041141.t1	MsLAC118	0.383289	0.114494	0	0	0.416627	0.523915
MS.gene010526.t1	MsLAC119	35.9888	3.80579	2.92264	0.378647	30.3429	9.21952
MS.gene02463.t1	MsLAC120	4.96596	0.144167	0	0	1.23506	0
MS.gene64676.t1	MsLAC121	10.3489	0	0.311656	0	164.606	1.51667
MS.gene44858.t1	MsLAC122	21.0947	0.101965	0.277434	0.148225	56.7006	4.70842
MS.gene50248.t1	MsLAC123	0	0	0	0	0	1.40171
MS.gene76101.t1	MsLAC124	0	0.108349	0.890418	6.69592	0	55.0678
MS.gene047683.t1	MsLAC125	0.27871	0	0	0	0	0.16499
MS.gene02442.t1	MsLAC126	2.05384	0.629495	1.22645	0.295024	0.772574	1.38624
MS.gene02440.t1	MsLAC127	0	0	0.450138	4.4322	0	32.2119
MS.gene009922.t1	MsLAC128	10.0307	0.230599	0.288736	0	24.2703	1.71646
MS.gene009762.t1	MsLAC129	12.6007	0	0	0	155.102	1.86298
MS.gene070066.t1	MsLAC130	27.7695	1.95678	0.466403	0	12.2754	0.955514
MS.gene29699.t1	MsLAC132	7.53935	0.719035	0.43124	0	3.27434	1.03837
MS.gene59385.t1	MsLAC133	20.6525	1.73636	1.7363	0.681731	13.1774	5.20647
MS.gene59387.t1	MsLAC134	0	0	0	0	0.165702	0
MS.gene88734.t1	MsLAC135	0.0940341	0	0	0	0	0
MS.gene041990.t1	MsLAC136	0	0.105702	6.04372	17.0303	0.130133	206.06
MS.gene80645.t1	MsLAC137	0	0	0	0	0	2.04505
MS.gene94205.t1	MsLAC138	11.3895	0.233349	0.428666	0	34.2627	1.82229
MS.gene94790.t1	MsLAC139	39.2657	2.96595	1.105	0	13.1294	1.46143
MS.gene94791.t1	MsLAC140	2.51666	0	0	0	0	0.0878523
MS.gene99610.t1	MsLAC141	19.1218	2.02665	1.30135	0	21.6915	5.32626
MS.gene65188.t1	MsLAC142	0	0	0	0	0	0
MS.gene65111.t1	MsLAC143	59.9503	15.1464	8.60274	20.5658	30.0646	74.4266
MS.gene65109.t1	MsLAC144	0	0	0	0.411098	0	18.0674
MS.gene011006.t1	MsLAC146	3.51694	0.23177	0.139421	1.21388	2.0513	3.36537
MS.gene77227.t1	MsLAC147	34.9783	0.118268	0.310818	2.07723	150.147	96.4567
MS.gene91701.t1	MsLAC148	0	0	0	0	0	93.7157
MS.gene46170.t1	MsLAC149	0.653144	0.255723	0	0.160375	1.93057	0.320169
MS.gene46161.t1	MsLAC150	1.38898	0.102483	0.576545	0.51575	0.378508	2.19601
MS.gene46028.t1	MsLAC151	4.1833	0	0	0.162746	18.5674	6.47212
MS.gene46027.t1	MsLAC152	0	0	0	0.205549	0	78.1905
MS.gene051251.t1	MsLAC153	2.51125	0.220645	0	0	3.25871	0.442141
MS.gene23169.t1	MsLAC154	5.09247	0	0.160502	0.162746	23.9412	9.85608
MS.gene84568.t1	MsLAC155	0	0	0	0	0	19.5192
MS.gene96844.t1	MsLAC156	0	0	0	0	0	22.192
MS.gene96856.t1
MS.gene64554.t1
MS.gene96583.t1
MS.gene96581.t1
MS.gene96577.t1
MS.gene051249.t1
MS.gene051248.t1
MS.gene055124.t1
MS.gene055125.t1
MS.gene055257.t1
MS.gene90316.t1
MS.gene66061.t1
MS.gene66063.t1
MS.gene012654.t1
MS.gene62870.t1
MS.gene44958.t1
MS.gene060530.t1
MS.gene011504.t1
MS.gene011878.t1
MS.gene011879.t1
MS.gene067288.t1
MS.gene71912.t1
MS.gene87345.t1
MS.gene87346.t1
MS.gene068376.t1
MS.gene28549.t1
MS.gene28548.t1
MS.gene84742.t1
