# Supplementary material
Source: Research Square preprint supplement (doi:10.21203/rs.3.rs-9789181/v1)
Supplement: Supplementary file 5 [file a9d6a285d858dbdeb2b71870.xlsx]

## Sheet: MsLAC蛋白理化性质(2)
Table S1 analysis of physicochemical properties
Gene ID		Number of Amino Acid	Molecular Weight	Theoretical pI	Instability Index	Aliphatic Index	Grand Average of Hydropathicity	Subcellular localization
MS.gene27107.t1	MsLAC1	542	60386	8.67	32.83	83.03	-0.279	vacu
MS.gene24091.t1	MsLAC2	542	60386	8.67	32.83	83.03	-0.279	extr
MS.gene040767.t1	MsLAC3	509	57422.6	5.02	28.03	83.81	-0.169	vacu
MS.gene005761.t1	MsLAC4	566	63037	5.48	35.62	84.35	-0.194	extr
MS.gene88938.t1	MsLAC5	542	60368	8.67	32.83	83.75	-0.276	vacu
MS.gene68428.t1	MsLAC6	565	62899.9	5.48	34.99	84.14	-0.183	vacu
MS.gene88984.t1	MsLAC7	542	60304.9	8.48	32.48	82.31	-0.281	vacu
MS.gene21407.t1	MsLAC8	540	60611.1	4.89	30.23	85.5	-0.178	vacu
MS.gene35833.t1	MsLAC9	539	60076.6	7.72	41.97	80.98	-0.281	chlo
MS.gene01142.t1	MsLAC10	579	65592.8	9.25	30.83	81.64	-0.236	vacu
MS.gene059311.t1	MsLAC11	539	60119.6	6.86	41.48	80.8	-0.281	chlo
MS.gene002173.t1	MsLAC12	564	63831.5	9.16	30.43	82.61	-0.256	chlo
MS.gene047086.t1	MsLAC13	579	65593.8	9.21	31.29	81.64	-0.236	vacu
MS.gene034345.t1	MsLAC14	539	60077.5	6.86	41.83	80.98	-0.281	chlo
MS.gene071950.t1	MsLAC15	579	65603.7	9.16	32.21	81.47	-0.252	plas
MS.gene84361.t1	MsLAC16	591	65858.1	6.16	29.06	82.12	-0.241	chlo
MS.gene04575.t1	MsLAC17	557	61136.7	9.29	25.79	93.75	0.027	vacu
MS.gene70576.t1	MsLAC18	565	63432.4	8.44	28	83.17	-0.281	pero
MS.gene70575.t1	MsLAC19	574	64353.2	6.68	31.5	85.44	-0.19	mito
MS.gene70574.t1	MsLAC20	599	67523.3	9.26	28.21	78.6	-0.352	vacu
MS.gene79849.t1	MsLAC21	549	61580.1	8.83	32.23	80.22	-0.34	cvto
MS.gene48502.t1	MsLAC22	542	61026.8	9.18	33.01	75.7	-0.298	cvto
MS.gene48504.t1	MsLAC23	536	60113.6	8.53	37.77	76.19	-0.278	extr
MS.gene52790.t1	MsLAC24	544	60368.3	9.43	29	84.54	-0.232	plas
MS.gene058407.t1	MsLAC25	591	65845.1	6.16	29.06	82.12	-0.236	chlo
MS.gene05606.t1	MsLAC26	557	61262.9	9.3	26.46	92.19	0.023	chlo
MS.gene039999.t1	MsLAC27	570	63427.3	9.21	38.63	82.42	-0.244	vacu
MS.gene25900.t1	MsLAC28	565	63432.4	8.44	28	83.17	-0.281	pero
MS.gene25899.t1	MsLAC29	574	64314.2	6.68	31.85	84.76	-0.194	mito
MS.gene25898.t1	MsLAC30	599	67496.1	9.17	29	78.76	-0.351	vacu
MS.gene77483.t1	MsLAC31	549	61580.1	8.83	32.23	80.22	-0.34	cyto
MS.gene77484.t1	MsLAC32	540	60710	8.73	34.15	78.83	-0.381	vacu
MS.gene012985.t1	MsLAC33	567	64103.5	9.26	36.32	76.65	-0.257	chlo
MS.gene012984.t1	MsLAC34	536	60060.6	8.54	36.52	75.84	-0.265	extr
MS.gene014367.t1	MsLAC35	544	60368.3	9.43	29	84.54	-0.232	chlo
MS.gene04051.t1	MsLAC36	557	61080.6	9.3	25.83	92.71	0.02	chlo
MS.gene007998.t1	MsLAC37	553	61572.4	9.16	37.11	84.41	-0.215	vacu
MS.gene022247.t1	MsLAC38	565	63432.4	8.44	28	83.17	-0.281	pero
MS.gene022246.t1	MsLAC39	574	64349.3	6.68	32.17	85.44	-0.191	mito
MS.gene022245.t1	MsLAC40	599	67493.2	9.26	28.21	78.76	-0.347	vacu
MS.gene75721.t1	MsLAC41	549	61580.1	8.83	32.23	80.22	-0.34	vacu
MS.gene75720.t1	MsLAC42	550	61650.2	8.83	33.4	79.89	-0.349	vacu
MS.gene38718.t1	MsLAC43	567	64103.5	9.3	35.96	76.65	-0.258	vacu
MS.gene38717.t1	MsLAC44	573	64570	8.87	39.32	78.25	-0.219	chlo
MS.gene69347.t1	MsLAC45	544	60368.3	9.43	29	84.54	-0.232	extr
MS.gene009433.t1	MsLAC46	578	64828.8	5.9	28.91	79.76	-0.253	chlo
MS.gene04460.t1	MsLAC47	557	61134.8	9.3	25.68	93.93	0.037	chlo
MS.gene031917.t1	MsLAC48	570	63427.3	9.21	38.63	82.42	-0.244	chlo
MS.gene074403.t1	MsLAC49	565	63432.4	8.44	28	83.17	-0.281	vacu
MS.gene074404.t1	MsLAC50	574	64281.2	6.68	31.9	85.94	-0.166	vacu
MS.gene045406.t1	MsLAC51	549	61580.1	8.83	32.23	80.22	-0.34	vacu
MS.gene045405.t1	MsLAC52	550	61650.2	8.83	33.4	79.89	-0.349	vacu
MS.gene054639.t1	MsLAC53	567	64076.5	9.3	36.3	76.65	-0.253	vacu
MS.gene054640.t1	MsLAC54	579	65272.7	8.8	39.65	77.44	-0.223	chlo
MS.gene064814.t1	MsLAC55	544	60340.2	9.43	29.15	84.19	-0.237	vacu
MS.gene006862.t1	MsLAC56	542	60875.4	9.06	34.24	78.03	-0.332	vacu
MS.gene006860.t1	MsLAC57	542	60875.4	9.06	34.24	78.03	-0.332	vacu
MS.gene006859.t1	MsLAC58	550	61666.2	8.62	35.29	81.31	-0.279	vacu
MS.gene003390.t1	MsLAC59	543	60992.2	9	34.35	80.94	-0.246	extr
MS.gene41139.t1	MsLAC60	587	65153.8	9.47	31.8	84.82	-0.107	chlo
MS.gene61580.t1	MsLAC61	538	59752	6.46	43.92	79.68	-0.257	extr
MS.gene73256.t1	MsLAC62	572	63546.3	6.62	29.77	80.61	-0.163	chlo
MS.gene037429.t1	MsLAC63	557	61255.8	9.35	29.46	89.91	-0.061	chlo
MS.gene70354.t1	MsLAC64	576	65112.7	7.37	41.67	76.75	-0.347	cyto
MS.gene82393.t1	MsLAC65	542	60848.3	9	33.97	78.03	-0.326	vacu
MS.gene82389.t1	MsLAC66	542	60848.3	9	33.97	78.03	-0.326	vacu
MS.gene82388.t1	MsLAC67	549	61561.1	8.79	35.9	80.58	-0.287	vacu
MS.gene052289.t1	MsLAC68	543	60982.2	9	34	81.82	-0.255	vacu
MS.gene92589.t1	MsLAC69	572	63532.2	6.62	29.51	80.44	-0.163	chlo
MS.gene89907.t1	MsLAC70	557	61211.7	9.32	29.03	89.91	-0.06	chlo
MS.gene059697.t1	MsLAC71	576	64921.4	7.69	40.08	76.93	-0.341	cyto
MS.gene030765.t1	MsLAC72	576	64911.4	7.69	40.51	76.93	-0.34	cyto
MS.gene059690.t1	MsLAC73	248	27952.4	8.48	40.93	67.14	-0.517	cyto
MS.gene004011.t1	MsLAC74	587	65193.9	9.47	32.22	84.82	-0.11	chlo
MS.gene95576.t1	MsLAC75	538	59813.2	6.63	43.67	79.14	-0.255	golg
MS.gene037658.t1	MsLAC76	572	63546.3	6.62	29.77	80.61	-0.163	chlo
MS.gene33479.t1	MsLAC77	556	61098.5	9.32	29.07	89.37	-0.067	chlo
MS.gene56463.t1	MsLAC78	542	60875.4	9.06	34.24	78.03	-0.332	vacu
MS.gene56466.t1	MsLAC79	542	60875.4	9.06	34.24	78.03	-0.332	vacu
MS.gene56467.t1	MsLAC80	550	61680.2	8.62	35.13	81.31	-0.279	vacu
MS.gene28940.t1	MsLAC81	543	60932.2	8.97	33.75	80.94	-0.239	extr
MS.gene021147.t1	MsLAC82	587	65304	9.47	31.06	85.49	-0.111	chlo
MS.gene027389.t1	MsLAC83	492	54475.9	6.48	45.46	78.43	-0.31	nucl
MS.gene048082.t1	MsLAC84	572	63588.3	6.62	29.51	81.1	-0.155	chlo
MS.gene052753.t1	MsLAC85	557	61270.7	9.28	28.91	90.09	-0.059	chlo
MS.gene010528.t1	MsLAC86	566	63006.6	9.22	29.18	82.84	-0.134	pero
MS.gene010533.t1	MsLAC87	561	62141.3	8.5	34.39	86.4	-0.072	extr
MS.gene43755.t1	MsLAC88	558	61891.7	9.42	24.57	89.25	-0.055	chlo
MS.gene35871.t1	MsLAC89	559	62049.3	9.47	30.48	81.99	-0.084	golg
MS.gene56689.t1	MsLAC90	696	76971.6	6.59	41.47	86.14	-0.05	chlo
MS.gene51086.t1	MsLAC91	567	62556.9	6.21	33.77	83.54	-0.159	chlo
MS.gene041141.t1	MsLAC92	538	60111	9.08	35.64	85.5	-0.287	vacu
MS.gene010526.t1	MsLAC93	566	63006.6	9.22	29.18	82.84	-0.134	pero
MS.gene02463.t1	MsLAC94	531	59130.1	9.34	26.56	83.73	-0.126	pero
MS.gene64676.t1	MsLAC95	561	62141.3	8.5	34.39	86.4	-0.072	extr
MS.gene44858.t1	MsLAC96	558	61857.6	9.38	25.38	88.89	-0.049	chlo
MS.gene50248.t1	MsLAC97	559	62063.3	9.42	30.07	82.15	-0.08	E.R
MS.gene76101.t1	MsLAC98	560	61693	6.36	33.85	83.38	-0.165	chlo
MS.gene047683.t1	MsLAC99	538	60121	9.09	37.17	86.41	-0.274	vacu
MS.gene02442.t1	MsLAC100	525	58199.7	9.07	27.98	80.02	-0.205	mito
MS.gene02440.t1	MsLAC101	561	62112.3	8.76	34.55	86.22	-0.073	extr
MS.gene009922.t1	MsLAC102	558	61856.5	9.45	25.41	88.55	-0.069	chlo
MS.gene009762.t1	MsLAC103	559	61993.1	9.3	29.37	82.16	-0.079	golg
MS.gene070066.t1	MsLAC104	554	61695.9	7.31	29.4	91.46	-0.018	chlo
MS.gene29699.t1	MsLAC105	567	62581	6.21	33.42	83.37	-0.168	chlo
MS.gene59385.t1	MsLAC106	568	63279.8	9.17	28.09	83.24	-0.135	pero
MS.gene59387.t1	MsLAC107	561	62090.2	8.76	33.7	86.22	-0.082	extr
MS.gene88734.t1	MsLAC108	558	62082.8	9.33	26.39	88.01	-0.06	chlo
MS.gene041990.t1	MsLAC109	559	61977.1	9.42	29.86	82.5	-0.074	extr
MS.gene80645.t1	MsLAC110	554	61663.9	7.31	29.87	92.53	-0.009	chlo
MS.gene94205.t1	MsLAC111	567	62569.9	6.21	34.34	83.54	-0.166	chlo
MS.gene94790.t1	MsLAC112	572	64049.7	8.02	33.52	85	-0.06	pero
MS.gene94791.t1	MsLAC113	573	63612.9	7.3	35.71	85.92	-0.03	chlo
MS.gene99610.t1	MsLAC114	593	66260	10.05	29.91	84.81	-0.177	chlo
MS.gene65188.t1	MsLAC115	529	58298.7	8.92	26.42	85.65	-0.108	cyto
MS.gene65111.t1	MsLAC116	580	64261.8	9.42	31.92	82.36	-0.15	chlo
MS.gene65109.t1	MsLAC117	580	64100.8	9.41	30.91	82.88	-0.121	vacu
MS.gene011006.t1	MsLAC118	528	59161.6	6.21	31.03	87.78	-0.228	chlo
MS.gene77227.t1	MsLAC119	580	64106.7	9.38	30.13	83.38	-0.109	nucl
MS.gene91701.t1	MsLAC120	529	58473.1	9.21	24.37	84.56	-0.131	cyto
MS.gene46170.t1	MsLAC121	542	60740.5	9.35	26.64	78.56	-0.253	chlo
MS.gene46161.t1	MsLAC122	593	66465.2	10.04	29.95	83.49	-0.202	chlo
MS.gene46028.t1	MsLAC123	570	63338.6	7.73	34.16	86.54	-0.011	chlo
MS.gene46027.t1	MsLAC124	558	62444	8.59	32.99	84.7	-0.063	pero
MS.gene051251.t1	MsLAC125	546	60976.4	6.12	31.02	84.52	-0.272	cyto
MS.gene23169.t1	MsLAC126	561	63228.3	6.6	31.8	85.58	-0.285	cyto
MS.gene84568.t1	MsLAC127	558	62425.9	8.28	33.93	84	-0.063	chlo
MS.gene96844.t1	MsLAC128	593	66360	10.03	29.57	84.49	-0.187	chlo
MS.gene96856.t1	MsLAC129	575	64744.3	9.34	27.25	82.17	-0.177	vacu
MS.gene64554.t1	MsLAC130	529	58427.9	9.01	26.87	85.29	-0.116	cyto
MS.gene96583.t1	MsLAC131	544	60127.9	9.32	31.75	80.48	-0.174	mito
MS.gene96581.t1	MsLAC132	580	64236.7	9.3	32.21	83.03	-0.129	chlo
MS.gene96577.t1	MsLAC133	580	64129.6	9.26	30.82	82.38	-0.119	vacu
MS.gene051249.t1	MsLAC134	450	50703.7	6.21	28.99	80.71	-0.377	chlo
MS.gene051248.t1	MsLAC135	507	56790.7	5.6	28.99	85.46	-0.271	chlo
MS.gene055124.t1	MsLAC136	572	64023.7	7.3	33.72	85	-0.053	chlo
MS.gene055125.t1	MsLAC137	570	63292.5	8.34	34.36	84.14	-0.034	chlo
MS.gene055257.t1	MsLAC138	586	65606	10.07	27.74	81.48	-0.224	chlo
MS.gene90316.t1	MsLAC139	529	58520	9.07	24.86	84.54	-0.128	cyto
MS.gene66061.t1	MsLAC140	544	60163.9	9.14	26.75	81.54	-0.181	mito
MS.gene66063.t1	MsLAC141	580	64106.7	9.34	31.55	83.03	-0.11	vacu
MS.gene012654.t1	MsLAC142	411	46134.3	9.99	43.08	78.22	-0.312	mito
MS.gene62870.t1	MsLAC143	590	66274.2	8.99	36.88	82.73	-0.275	plas
MS.gene44958.t1	MsLAC144	542	60194.7	9.09	31.91	90.3	-0.135	vacu
MS.gene060530.t1	MsLAC145	571	63914	8.61	36.69	83.77	-0.168	chlo
MS.gene011504.t1	MsLAC146	590	66306.2	8.99	36.75	82.24	-0.279	plas
MS.gene011878.t1	MsLAC147	540	60549.7	9.06	37.49	89.89	-0.208	vacu
MS.gene011879.t1	MsLAC148	542	60238.7	9.09	31.71	90.3	-0.139	vacu
MS.gene067288.t1	MsLAC149	548	61187.7	7.63	37.95	82.14	-0.221	cyto
MS.gene71912.t1	MsLAC150	590	66274.2	8.99	36.88	82.73	-0.275	plas
MS.gene87345.t1	MsLAC151	540	60609.8	9.06	38.13	89.7	-0.202	vacu
MS.gene87346.t1	MsLAC152	542	60194.7	9.16	31.41	90.11	-0.146	vacu
MS.gene068376.t1	MsLAC153	548	61138.6	7.63	37.81	82.14	-0.225	cyto
MS.gene28549.t1	MsLAC154	540	60609.8	9.06	38.13	89.7	-0.202	vacu
MS.gene28548.t1	MsLAC155	541	60109.6	9.1	30.61	90.09	-0.14	extr
MS.gene84742.t1	MsLAC156	548	61209.7	8.54	36.62	81.42	-0.24	cyto
