# Supplementary material
Source: Research Square preprint supplement (doi:10.21203/rs.3.rs-9789181/v1)
Supplement: Supplementary file 6 [file e88f23233f8ab3c517ea91e3.xlsx]

## Sheet: Sheet1
	MsLAC1	MsLAC2
	MsLAC1	MsLAC5
	MsLAC1	MsLAC7
	MsLAC1	MsLAC24
	MsLAC1	MsLAC35
	MsLAC1	MsLAC45
	MsLAC1	MsLAC55
	MsLAC2	MsLAC5
	MsLAC4	MsLAC6
	MsLAC4	MsLAC8
	MsLAC2	MsLAC7
	MsLAC2	MsLAC24
	MsLAC2	MsLAC35
	MsLAC2	MsLAC45
	MsLAC2	MsLAC55
	MsLAC6	MsLAC8
	MsLAC5	MsLAC7
	MsLAC5	MsLAC24
	MsLAC5	MsLAC35
	MsLAC5	MsLAC45
	MsLAC5	MsLAC55
	MsLAC7	MsLAC24
	MsLAC7	MsLAC35
	MsLAC7	MsLAC45
	MsLAC7	MsLAC55
	MsLAC10	MsLAC12
	MsLAC9	MsLAC11
	MsLAC10	MsLAC13
	MsLAC10	MsLAC15
	MsLAC9	MsLAC14
	MsLAC9	MsLAC61
	MsLAC9	MsLAC75
	MsLAC9	MsLAC83
	MsLAC12	MsLAC13
	MsLAC12	MsLAC15
	MsLAC11	MsLAC14
	MsLAC11	MsLAC61
	MsLAC11	MsLAC75
	MsLAC11	MsLAC83
	MsLAC13	MsLAC15
	MsLAC14	MsLAC61
	MsLAC14	MsLAC75
	MsLAC14	MsLAC83
	MsLAC17	MsLAC26
	MsLAC22	MsLAC33
	MsLAC24	MsLAC35
	MsLAC16	MsLAC25
	MsLAC18	MsLAC28
	MsLAC21	MsLAC31
	MsLAC17	MsLAC36
	MsLAC18	MsLAC38
	MsLAC24	MsLAC45
	MsLAC22	MsLAC43
	MsLAC21	MsLAC41
	MsLAC17	MsLAC47
	MsLAC24	MsLAC55
	MsLAC22	MsLAC53
	MsLAC16	MsLAC46
	MsLAC18	MsLAC49
	MsLAC21	MsLAC51
	MsLAC17	MsLAC88
	MsLAC17	MsLAC96
	MsLAC17	MsLAC102
	MsLAC17	MsLAC108
	MsLAC26	MsLAC36
	MsLAC27	MsLAC37
	MsLAC31	MsLAC41
	MsLAC35	MsLAC45
	MsLAC33	MsLAC43
	MsLAC28	MsLAC38
	MsLAC26	MsLAC47
	MsLAC27	MsLAC48
	MsLAC28	MsLAC49
	MsLAC31	MsLAC51
	MsLAC25	MsLAC46
	MsLAC35	MsLAC55
	MsLAC33	MsLAC53
	MsLAC27	MsLAC91
	MsLAC26	MsLAC88
	MsLAC27	MsLAC98
	MsLAC26	MsLAC96
	MsLAC27	MsLAC105
	MsLAC26	MsLAC102
	MsLAC27	MsLAC111
	MsLAC26	MsLAC108
	MsLAC36	MsLAC47
	MsLAC37	MsLAC48
	MsLAC38	MsLAC49
	MsLAC43	MsLAC53
	MsLAC41	MsLAC51
	MsLAC45	MsLAC55
	MsLAC37	MsLAC91
	MsLAC36	MsLAC88
	MsLAC37	MsLAC98
	MsLAC36	MsLAC96
	MsLAC37	MsLAC105
	MsLAC36	MsLAC102
	MsLAC37	MsLAC111
	MsLAC36	MsLAC108
	MsLAC48	MsLAC91
	MsLAC47	MsLAC88
	MsLAC48	MsLAC98
	MsLAC47	MsLAC96
	MsLAC48	MsLAC105
	MsLAC47	MsLAC102
	MsLAC48	MsLAC111
	MsLAC47	MsLAC108
	MsLAC59	MsLAC68
	MsLAC62	MsLAC69
	MsLAC63	MsLAC70
	MsLAC56	MsLAC65
	MsLAC58	MsLAC67
	MsLAC60	MsLAC74
	MsLAC61	MsLAC75
	MsLAC62	MsLAC76
	MsLAC63	MsLAC77
	MsLAC60	MsLAC82
	MsLAC61	MsLAC83
	MsLAC62	MsLAC84
	MsLAC63	MsLAC85
	MsLAC56	MsLAC78
	MsLAC58	MsLAC80
	MsLAC59	MsLAC81
	MsLAC69	MsLAC76
	MsLAC64	MsLAC71
	MsLAC70	MsLAC77
	MsLAC69	MsLAC84
	MsLAC70	MsLAC85
	MsLAC68	MsLAC81
	MsLAC65	MsLAC78
	MsLAC67	MsLAC80
	MsLAC75	MsLAC83
	MsLAC76	MsLAC84
	MsLAC74	MsLAC82
	MsLAC77	MsLAC85
	MsLAC82	MsLAC121
	MsLAC91	MsLAC98
	MsLAC88	MsLAC96
	MsLAC89	MsLAC97
	MsLAC88	MsLAC102
	MsLAC89	MsLAC103
	MsLAC90	MsLAC104
	MsLAC91	MsLAC105
	MsLAC90	MsLAC110
	MsLAC91	MsLAC111
	MsLAC88	MsLAC108
	MsLAC89	MsLAC109
	MsLAC96	MsLAC102
	MsLAC97	MsLAC103
	MsLAC98	MsLAC105
	MsLAC92	MsLAC99
	MsLAC93	MsLAC100
	MsLAC93	MsLAC106
	MsLAC96	MsLAC108
	MsLAC98	MsLAC111
	MsLAC97	MsLAC109
	MsLAC92	MsLAC147
	MsLAC92	MsLAC151
	MsLAC92	MsLAC154
	MsLAC102	MsLAC108
	MsLAC104	MsLAC110
	MsLAC105	MsLAC111
	MsLAC100	MsLAC106
	MsLAC103	MsLAC109
	MsLAC99	MsLAC147
	MsLAC99	MsLAC151
	MsLAC99	MsLAC154
	MsLAC118	MsLAC126
	MsLAC115	MsLAC120
	MsLAC112	MsLAC123
	MsLAC112	MsLAC127
	MsLAC114	MsLAC128
	MsLAC115	MsLAC130
	MsLAC112	MsLAC136
	MsLAC114	MsLAC138
	MsLAC115	MsLAC139
	MsLAC120	MsLAC130
	MsLAC121	MsLAC129
	MsLAC123	MsLAC127
	MsLAC120	MsLAC139
	MsLAC123	MsLAC136
	MsLAC127	MsLAC136
	MsLAC128	MsLAC138
	MsLAC130	MsLAC139
	MsLAC131	MsLAC140
	MsLAC145	MsLAC149
	MsLAC143	MsLAC146
	MsLAC145	MsLAC153
	MsLAC143	MsLAC150
	MsLAC145	MsLAC156
	MsLAC149	MsLAC153
	MsLAC146	MsLAC150
	MsLAC147	MsLAC151
	MsLAC149	MsLAC156
	MsLAC147	MsLAC154
	MsLAC153	MsLAC156
	MsLAC151	MsLAC154

## Sheet: Sheet2
Table S2 Segmental duplication events involved in MsLACs.
Duplication events	Gene name1	Gene name 2	Chr Location for gene1	Chr Location for gene2
Segmental duplication event1	MsLAC1	MsLAC2	chr1.1:187629-190387	chr1.2:118529-121275
Segmental duplication event2	MsLAC1	MsLAC5	chr1.1:187629-190387	chr1.3:101051-103805
Segmental duplication event3	MsLAC1	MsLAC7	chr1.1:187629-190387	chr1.3:63426757-634293373
Segmental duplication event4	MsLAC1	MsLAC24	chr1.1:187629-190387	chr3.1:64570354-64575658
Segmental duplication event5	MsLAC1	MsLAC35	chr1.1:187629-190387	chr3.2:69520133-69524342
Segmental duplication event6	MsLAC1	MsLAC45	chr1.1:187629-190387	chr3.3:66660416-66666200
Segmental duplication event7	MsLAC1	MsLAC55	chr1.1:187629-190387	chr3.4:75255880-75261576
Segmental duplication event8	MsLAC2	MsLAC5	chr1.2:118529-121275	chr1.3:101051-103805
Segmental duplication event9	MsLAC4	MsLAC6	chr1.2:67935718-67938349	chr1.3:33645981-33648279
Segmental duplication event10	MsLAC4	MsLAC8	chr1.2:67935718-67938349	chr1.4:416812-419568
Segmental duplication event11	MsLAC2	MsLAC7	chr1.2:118529-121275	chr1.3:63426757-634293373
Segmental duplication event12	MsLAC2	MsLAC24	chr1.2:118529-121275	chr3.1:64570354-64575658
Segmental duplication event13	MsLAC2	MsLAC35	chr1.2:118529-121275	chr3.2:69520133-69524342
Segmental duplication event14	MsLAC2	MsLAC45	chr1.2:118529-121275	chr3.3:66660416-66666200
Segmental duplication event15	MsLAC2	MsLAC55	chr1.2:118529-121275	chr3.4:75255880-75261576
Segmental duplication event16	MsLAC6	MsLAC8	chr1.3:33645981-33648279	chr1.4:416812-419568
Segmental duplication event17	MsLAC5	MsLAC7	chr1.3:101051-103805	chr1.3:63426757-634293373
Segmental duplication event18	MsLAC5	MsLAC24	chr1.3:101051-103805	chr3.1:64570354-64575658
Segmental duplication event19	MsLAC5	MsLAC35	chr1.3:101051-103805	chr3.2:69520133-69524342
Segmental duplication event20	MsLAC5	MsLAC45	chr1.3:101051-103805	chr3.3:66660416-66666200
Segmental duplication event21	MsLAC5	MsLAC55	chr1.3:101051-103805	chr3.4:75255880-75261576
Segmental duplication event22	MsLAC7	MsLAC24	chr1.3:63426757-634293373	chr3.1:64570354-64575658
Segmental duplication event23	MsLAC7	MsLAC35	chr1.3:63426757-634293373	chr3,2:69520133-69524342
Segmental duplication event24	MsLAC7	MsLAC45	chr1.3:63426757-634293373	chr3.4:66660416-66666200
Segmental duplication event25	MsLAC7	MsLAC55	chr1.3:63426757-634293373	chr3.4:75255880-75261576
Segmental duplication event26	MsLAC10	MsLAC12	chr1.4:71880794-71883223	chr2.1:13741749-13744519
Segmental duplication event27	MsLAC9	MsLAC11	chr:35572864-35576166	chr2.1:74283484-74287359
Segmental duplication event28	MsLAC10	MsLAC13	chr1.4:71880794-71883223	chr2.2:11189901-11192691
Segmental duplication event29	MsLAC10	MsLAC15	chr1.4:71880794-71883223	chr2.3:74208022-74211900
Segmental duplication event30	MsLAC9	MsLAC14	chr1.4:35572864-35576166	chr2.2:71800434-71805250
Segmental duplication event31	MsLAC9	MsLAC61	chr1.4:35572864-35576166	chr3.4:89496743-89501132
Segmental duplication event32	MsLAC9	MsLAC75	chr1.4:35572864-35576166	chr4.2:10534956-10537830
Segmental duplication event33	MsLAC9	MsLAC83	chr1.4:35572864-35576166	chr4.2:86317070-86320771
Segmental duplication event34	MsLAC12	MsLAC13	chr2.1:13741749-13744519	chr2.2:11189901-11192691
Segmental duplication event35	MsLAC12	MsLAC15	chr2.1:13741749-13744519	chr2.3:74208022-74211900
Segmental duplication event36	MsLAC11	MsLAC14	chr2.1:74283484-74287359	chr2.2:71800434-71805250
Segmental duplication event37	MsLAC11	MsLAC61	chr2.1:74283484-74287359	chr3.4:89496743-89501132
Segmental duplication event38	MsLAC11	MsLAC75	chr2.1:74283484-74287359	chr4.2:10534956-10537830
Segmental duplication event39	MsLAC11	MsLAC83	chr2.1:74283484-74287359	chr4.2:86317070-86320771
Segmental duplication event40	MsLAC13	MsLAC15	chr2.2:11189901-11192691	chr2.3:74208022-74211900
Segmental duplication event41	MsLAC14	MsLAC61	chr2.2:71800434-71805250	chr3.4:89496743-89501132
Segmental duplication event42	MsLAC14	MsLAC75	chr2.2:71800434-71805250	chr4.2:10534956-10537830
Segmental duplication event43	MsLAC14	MsLAC83	chr2.2:71800434-71805250	chr4.2:86317070-86320771
Segmental duplication event44	MsLAC17	MsLAC26	chr2.4:74679005-74682931	chr3.1:80675267-80678342
Segmental duplication event45	MsLAC22	MsLAC33	chr3.1:64525545-64531230	chr3.2:69496048-69501745
Segmental duplication event46	MsLAC24	MsLAC35	chr3.1:64570354-64575658	chr3.2:69520133-69524342
Segmental duplication event47	MsLAC16	MsLAC25	chr2.4:13095519-13098725	chr3.1:65944487-65946136
Segmental duplication event48	MsLAC18	MsLAC28	chr3.1:4118696-4124143	chr3.1:91052651-91060445
Segmental duplication event49	MsLAC21	MsLAC31	chr3.1:58715914-58722253	chr3.2:53692198-53695771
Segmental duplication event50	MsLAC17	MsLAC36	chr2.4:74679005-74682931	chr:
Segmental duplication event51	MsLAC18	MsLAC38	chr3.1:4118696-4124143	chr:
Segmental duplication event52	MsLAC24	MsLAC45	chr3.1:64570354-64575658	chr3.3:66660416-66666200
Segmental duplication event53	MsLAC22	MsLAC43	chr3.1:64525545-64531230	chr3.3:62485012-62489868
Segmental duplication event54	MsLAC21	MsLAC41	chr3.1:58715914-58722253	chr3.3:4301887-4306691
Segmental duplication event55	MsLAC17	MsLAC47	chr2.4:74679005-74682931	chr3.3:70107623-70109272
Segmental duplication event56	MsLAC24	MsLAC55	chr3.1:64570354-64575658	chr3.4:75255880-75261576
Segmental duplication event57	MsLAC22	MsLAC53	chr3.1:64525545-64531230	chr3.4:58194515-58198073
Segmental duplication event58	MsLAC16	MsLAC46	chr2.4:13095519-13098725	chr3.3:66670329-66675629
Segmental duplication event59	MsLAC18	MsLAC49	chr3.1:4118696-4124143	chr3.3:84163619-84166838
Segmental duplication event60	MsLAC21	MsLAC51	chr3.1:58715914-58722253	chr3.3:93858540-93864905
Segmental duplication event61	MsLAC17	MsLAC88	chr2.4:74679005-74682931	chr4.3:39424201-39427597
Segmental duplication event62	MsLAC17	MsLAC96	chr2.4:74679005-74682931	chr4.4:34589558-34593133
Segmental duplication event63	MsLAC17	MsLAC102	chr2.4:74679005-74682931	chr5.1:10399129-10405095
Segmental duplication event64	MsLAC17	MsLAC108	chr2.4:74679005-74682931	chr5.1:56417874-56421278
Segmental duplication event65	MsLAC26	MsLAC36	chr3.1:80675267-80678342	chr3.2:72147215-72148864
Segmental duplication event66	MsLAC27	MsLAC37	chr3.1:80712213-80716335	chr3.2:72150050-72151672
Segmental duplication event67	MsLAC31	MsLAC41	chr3.2:53692198-53695771	chr3.3:4301887-4306691
Segmental duplication event68	MsLAC35	MsLAC45	chr3.2:69520133-69524342	chr3.3:66660416-66666200
Segmental duplication event69	MsLAC33	MsLAC43	chr3.2:69496048-69501745	chr3.3:62485012-62489868
Segmental duplication event70	MsLAC28	MsLAC38	chr3.1:91052651-91060445	chr3.2:84626036-84629340
Segmental duplication event71	MsLAC26	MsLAC47	chr3.1:80675267-80678342	chr3.3:70107623-70109272
Segmental duplication event72	MsLAC27	MsLAC48	chr3.1:80712213-80716335	chr3.3:70110458-70112110
Segmental duplication event73	MsLAC28	MsLAC49	chr3.1:91052651-91060445	chr3.3:84163619-84166838
Segmental duplication event74	MsLAC31	MsLAC51	chr3.2:53692198-53695771	chr3.3:93858540-93864905
Segmental duplication event75	MsLAC25	MsLAC46	chr3.1:65944487-65946136	chr3.3:66670329-66675629
Segmental duplication event76	MsLAC35	MsLAC55	chr3.2:69520133-69524342	chr3.4:75255880-75261576
Segmental duplication event77	MsLAC33	MsLAC53	chr3.2:69496048-69501754	chr3.4:58194515-58198073
Segmental duplication event78	MsLAC27	MsLAC91	chr3.1:80712213-80716335	chr4.3:83300320-83304040
Segmental duplication event79	MsLAC26	MsLAC88	chr3.1:80675267-80678342	chr4.3:39424201-39427597
Segmental duplication event80	MsLAC27	MsLAC98	chr3.1:80712213-80716335	chr4.4:41744923-41748335
Segmental duplication event81	MsLAC26	MsLAC96	chr3.1:80675267-80678342	chr4.4:34589558-34593133
Segmental duplication event82	MsLAC27	MsLAC105	chr3.1:80712213-80716335	chr5.1:12009883-12011995
Segmental duplication event83	MsLAC26	MsLAC102	chr3.1:80675267-80678342	chr5.1:10399129-10405095
Segmental duplication event84	MsLAC27	MsLAC111	chr3.1:80712213-80716335	chr5.2:10228128-10231818
Segmental duplication event85	MsLAC26	MsLAC108	chr3.1:80675267-80678342	chr5.1:56417874-56421278
Segmental duplication event86	MsLAC36	MsLAC47	chr3.2:72147215-72148864	chr3.3:70107623-70109272
Segmental duplication event87	MsLAC37	MsLAC48	chr3.2:72150050-72151672	chr3.3:70110458-70112110
Segmental duplication event88	MsLAC38	MsLAC49	chr3.2:84626036-84629340	chr3.3:84163619-84166838
Segmental duplication event89	MsLAC43	MsLAC53	chr3.3:62485012-62489868	chr3.4:58194515-58198073
Segmental duplication event90	MsLAC41	MsLAC51	chr3.3:4301887-4306691	chr3.3:93858540-93864905
Segmental duplication event91	MsLAC45	MsLAC55	chr3.3:66660416-66666200	chr3.4:75255880-75261576
Segmental duplication event92	MsLAC37	MsLAC91	chr3.2:72150050-72151672	chr4.3:83300320-83304040
Segmental duplication event93	MsLAC36	MsLAC88	chr3.2:72147215-72148864	chr4.3:39424201-39427597
Segmental duplication event94	MsLAC37	MsLAC98	chr3.2:72150050-72151672	chr4.4:41744923-41748335
Segmental duplication event95	MsLAC36	MsLAC96	chr3.2:72147215-72148864	chr4.4:34589558-34593133
Segmental duplication event96	MsLAC37	MsLAC105	chr3.2:72150050-72151672	chr5.1:12009883-12011995
Segmental duplication event97	MsLAC36	MsLAC102	chr3.2:72147215-72148864	chr5.1:10399129-10405095
Segmental duplication event98	MsLAC37	MsLAC111	chr3.2:72150050-72151672	chr5.2:10228128-10231818
Segmental duplication event99	MsLAC36	MsLAC108	chr3.2:72147215-72148864	chr5.1:56417874-56421278
Segmental duplication event100	MsLAC48	MsLAC91	chr3.3:70110458-70112110	chr4.3:83300320-83304040
Segmental duplication event101	MsLAC47	MsLAC88	chr3.3:70107623-70109272	chr4.3:39424201-39427597
Segmental duplication event102	MsLAC48	MsLAC98	chr3.3:70110458-70112110	chr4.4:41744923-41748335
Segmental duplication event103	MsLAC47	MsLAC96	chr3.3:70107623-70109272	chr4.4:34589558-34593133
Segmental duplication event104	MsLAC48	MsLAC105	chr3.3:70110458-70112110	chr5.1:12009883-12011995
Segmental duplication event105	MsLAC47	MsLAC102	chr3.3:70107623-70109272	chr5.1:10399129-10405095
Segmental duplication event106	MsLAC48	MsLAC111	chr3.3:70110458-70112110	chr5.2:10228128-10231818
Segmental duplication event107	MsLAC47	MsLAC108	chr3.3:70107623-70109272	chr5.1:56417874-56421278
Segmental duplication event108	MsLAC59	MsLAC68	chr3.4:78467446-78469098	chr4.1:28564034-28566601
Segmental duplication event109	MsLAC62	MsLAC69	chr3.4:98450736-98458681	chr4.1:28618558-28620401
Segmental duplication event110	MsLAC63	MsLAC70	chr4.1:9957059-9959526	chr4.1:28332812-28336387
Segmental duplication event111	MsLAC56	MsLAC65	chr3.4:75272169-75283113	chr4.1:24437317-24438945
Segmental duplication event112	MsLAC58	MsLAC67	chr3.4:78464611-78466260	chr4.1:24466312-24468274
Segmental duplication event113	MsLAC60	MsLAC74	chr3.4:89477159-89480464	chr4.1:81155180-81159619
Segmental duplication event114	MsLAC61	MsLAC75	chr3.4:89496743-89501132	chr4.2:10534956-10537830
Segmental duplication event115	MsLAC62	MsLAC76	chr3.4:98450736-98458681	chr4.2:26239459-26241087
Segmental duplication event116	MsLAC63	MsLAC77	chr4.1:9957059-9959526	chr4.2:26301977-26303605
Segmental duplication event117	MsLAC60	MsLAC82	chr3.4:89477159-89480464	chr4.2:82940964-82946180
Segmental duplication event118	MsLAC61	MsLAC83	chr3.4:89496743-89501132	chr4.2:86317070-86320771
Segmental duplication event119	MsLAC62	MsLAC84	chr3.4:98450736-98458681	chr4.2:9788484-9791362
Segmental duplication event120	MsLAC63	MsLAC85	chr4.1:9957059-9959526	chr4.3:9814157-9817035
Segmental duplication event121	MsLAC56	MsLAC78	chr3.4:75272169-75283113	chr4.2:26309852-26311814
Segmental duplication event122	MsLAC58	MsLAC80	chr3.4:78464611-78466260	chr4.2:33593887-33596454
Segmental duplication event123	MsLAC59	MsLAC81	chr3.4:78467446-78469098	chr4.2:40610576-40615318
Segmental duplication event124	MsLAC69	MsLAC76	chr4.1:28618558-28620401	chr4.2:26239459-26241087
Segmental duplication event125	MsLAC64	MsLAC71	chr4.1:9971152-9973606	chr4.1:36163869-36167226
Segmental duplication event126	MsLAC70	MsLAC77	chr4.1:28332812-28336387	chr4.2:26301977-26303605
Segmental duplication event127	MsLAC69	MsLAC84	chr4.1:28618558-28620401	chr4.2:9788484-9791362
Segmental duplication event128	MsLAC70	MsLAC85	chr4.1:28332812-28336387	chr4.3:9814157-9817035
Segmental duplication event129	MsLAC68	MsLAC81	chr4.1:28564034-28566601	chr4.2:40610576-40615318
Segmental duplication event130	MsLAC65	MsLAC78	chr4.1:24437317-24438945	chr4.2:26309852-26311814
Segmental duplication event131	MsLAC67	MsLAC80	chr4.1:24466312-24468274	chr4.2:33593887-33596454
Segmental duplication event132	MsLAC75	MsLAC83	chr4.2:10534956-10537830	chr4.2:86317070-86320771
Segmental duplication event133	MsLAC76	MsLAC84	chr4.2:26239459-26241087	chr4.2:9788484-9791362
Segmental duplication event134	MsLAC74	MsLAC82	chr4.1:81155180-81159619	chr4.2:82940964-82946180
Segmental duplication event135	MsLAC77	MsLAC85	chr4.2:26301977-26303605	chr4.3:9814157-9817035
Segmental duplication event136	MsLAC82	MsLAC121	chr4.2:82940964-82946180	chr5.3:11907306-11909740
Segmental duplication event137	MsLAC91	MsLAC98	chr4.3:83300320-83304040	chr4.4:41744923-41748335
Segmental duplication event138	MsLAC88	MsLAC96	chr4.3:39424201-39427597	chr4.4:34589558-34593133
Segmental duplication event139	MsLAC89	MsLAC97	chr4.3:50154467-50168953	chr4.4:34846793-34850581
Segmental duplication event140	MsLAC88	MsLAC102	chr4.3:39424201-39427597	chr5.1:10399129-10405095
Segmental duplication event141	MsLAC89	MsLAC103	chr4.3:50154467-50168953	chr5.1:12009883-12011995
Segmental duplication event142	MsLAC90	MsLAC104	chr4.3:79435642-79440916	chr5.1:11997897-12001017
Segmental duplication event143	MsLAC91	MsLAC105	chr4.3:83300320-83304040	chr5.1:12009883-12011995
Segmental duplication event144	MsLAC90	MsLAC110	chr4.3:79435642-79440916	chr5.1:65687343-65691079
Segmental duplication event145	MsLAC91	MsLAC111	chr4.3:83300320-83304040	chr5.2:10228128-10231818
Segmental duplication event146	MsLAC88	MsLAC108	chr4.3:39424201-39427597	chr5.1:56417874-56421278
Segmental duplication event147	MsLAC89	MsLAC109	chr4.3:50154467-50168953	chr5.1:63923681-63928190
Segmental duplication event148	MsLAC96	MsLAC102	chr4.4:34589558-34593133	chr5.1:10399129-10405095
Segmental duplication event149	MsLAC97	MsLAC103	chr4.4:34846793-34850581	chr5.1:11988213-11990447
Segmental duplication event150	MsLAC98	MsLAC105	chr4.4:41744923-41748335	chr5.1:12009883-12011995
Segmental duplication event151	MsLAC92	MsLAC99	chr4.4:10076438-10077403	chr4.4:52655835-52659723
Segmental duplication event152	MsLAC93	MsLAC100	chr4.4:29849057-29850685	chr4.4:81885831-81891348
Segmental duplication event153	MsLAC93	MsLAC106	chr4.4:29849057-29850685	chr5.1:12019771-12022005
Segmental duplication event154	MsLAC96	MsLAC108	chr4.4:34589558-34593133	chr5.1:56417874-56421278
Segmental duplication event155	MsLAC98	MsLAC111	chr4.4:41744923-41748335	chr5.2:10228128-10231818
Segmental duplication event156	MsLAC97	MsLAC109	chr4.4:34846793-34850581	chr5.1:63923681-63928190
Segmental duplication event157	MsLAC92	MsLAC147	chr4.4:10076438-10077403	chr7.2:40356223-40358067
Segmental duplication event158	MsLAC92	MsLAC151	chr4.4:10076438-10077403	chr8.3:73952011-73954577
Segmental duplication event159	MsLAC92	MsLAC154	chr4.4:10076438-10077403	chr8.4:1764524-1767873
Segmental duplication event160	MsLAC102	MsLAC108	chr5.1:10399129-10405095	chr5.1:56417874-56421278
Segmental duplication event161	MsLAC104	MsLAC110	chr5.1:11997897-12001017	chr5.1:65687343-65691079
Segmental duplication event162	MsLAC105	MsLAC111	chr5.1:12009883-12011995	chr5.2:10228128-10231818
Segmental duplication event163	MsLAC100	MsLAC106	chr4.4:81885831-81891348	chr5.1:12019771-12022005
Segmental duplication event164	MsLAC103	MsLAC109	chr5.1:11988213-11990447	chr5.1:63923681-63928190
Segmental duplication event165	MsLAC99	MsLAC147	chr4.4:52655835-52659723	chr7.2:40356223-40358067
Segmental duplication event166	MsLAC99	MsLAC151	chr4.4:52655835-52659723	chr8.3:73952011-73954577
Segmental duplication event167	MsLAC99	MsLAC154	chr4.4:52655835-52659723	chr8.4:1764524-1767873
Segmental duplication event168	MsLAC118	MsLAC126	chr5.2:71377792-71381459	chr5.4:12547224-12550321
Segmental duplication event169	MsLAC115	MsLAC120	chr5.2:58843607-58847729	chr5.3:11895044-11897485
Segmental duplication event170	MsLAC112	MsLAC123	chr5.2:11844051-11866809	chr5.3:58064441-58067257
Segmental duplication event171	MsLAC112	MsLAC127	chr5.2:11844051-11866809	chr5.4:12557506-12559939
Segmental duplication event172	MsLAC114	MsLAC128	chr5.2:11901669-11903903	chr5.4:54470534-54474400
Segmental duplication event173	MsLAC115	MsLAC130	chr5.2:58843607-58847729	chr5.4:64483334-64486238
Segmental duplication event174	MsLAC112	MsLAC136	chr5.2:11844051-11866809	chr7.1:39200997-39203699
Segmental duplication event175	MsLAC114	MsLAC138	chr5.2:11901669-11903903	chr7.1:41199650-41202700
Segmental duplication event176	MsLAC115	MsLAC139	chr5.2:58843607-58847729	chr7.1:42780994-42782804
Segmental duplication event177	MsLAC120	MsLAC130	chr5.3:11895044-11897485	chr5.4:64483334-64486238
Segmental duplication event178	MsLAC121	MsLAC129	chr5.3:11907306-11909740	chr5.4:60963533-60966416
Segmental duplication event179	MsLAC123	MsLAC127	chr5.3:58064441-58067257	chr5.4:12557506-12559939
Segmental duplication event180	MsLAC120	MsLAC139	chr5.3:11895044-11897485	chr7.1:42780994-42782804
Segmental duplication event181	MsLAC123	MsLAC136	chr5.3:58064441-58067257	chr7.1:39200997-39203699
Segmental duplication event182	MsLAC127	MsLAC136	chr5.4:12557506-12559939	chr7.1:39200997-39203699
Segmental duplication event183	MsLAC128	MsLAC138	chr5.4:54470534-54474400	chr7.1:41199650-41202700
Segmental duplication event184	MsLAC130	MsLAC139	chr5.4:64483334-64486238	chr7.1:42780994-42782804
Segmental duplication event185	MsLAC131	MsLAC140	chr5.4:64518513-64522968	chr7.1:42789472-42792081
Segmental duplication event186	MsLAC145	MsLAC149	chr7.2:39312772-39316046	chr7.2:43219990-43223547
Segmental duplication event187	MsLAC143	MsLAC146	chr7.2:37292999-37295583	chr7.2:40200133-40203823
Segmental duplication event188	MsLAC145	MsLAC153	chr7.2:39312772-39316046	chr8.3:13419881-13426381
Segmental duplication event189	MsLAC143	MsLAC150	chr7.2:37292999-37295583	chr7.2:43247826-43250922
Segmental duplication event190	MsLAC145	MsLAC156	chr7.2:39312772-39316046	chr8.4:69553521-69556151
Segmental duplication event191	MsLAC149	MsLAC153	chr7.2:43219990-43223547	chr8.3:13419881-13426381
Segmental duplication event192	MsLAC146	MsLAC150	chr7.2:40200133-40203823	chr7.2:43247826-43250922
Segmental duplication event193	MsLAC147	MsLAC151	chr7.2:40356223-40358067	chr8.3:73952011-73954577
Segmental duplication event194	MsLAC149	MsLAC156	chr7.2:43219990-43223547	chr8.4:69553521-69556151
Segmental duplication event195	MsLAC147	MsLAC154	chr7.2:40356223-40358067	chr8.4:1764524-1767873
Segmental duplication event196	MsLAC153	MsLAC156	chr8.3:13419881-13426381	chr8.4:69553521-69556151
Segmental duplication event197	MsLAC151	MsLAC154	chr8.3:73952011-73954577	chr8.4:1764524-1767873
