# Supplementary material
Source: Research Square preprint supplement (doi:10.21203/rs.3.rs-9789181/v1)
Supplement: Supplementary file 7 [file fd0512516e7991080c4d535c.xlsx]

## Sheet: Sheet1
Table S3 Tandem duplication events involved in MsLACs.																		Chr for gene2	Left positon	Right position		Chr for gene3	Left positon	Right position		Chr for gene4	Left positon	Right position
Duplication events	Gene name1	Gene name 2	Gene name 3	Gene name 4	Gene name 5	Chr Location for gene1	Chr Location for gene2	Chr Location for gene3
Tandem duplication event1	MsLAC22	MsLAC23	MsLAC24			chr3.1:64525545-64531230	chr3.1:64559887-64565603	chr3.164570354-64575658
Tandem duplication event2	MsLAC26	MsLAC27				chr3.1:80675267-80678342	chr3.1:80712213-80716335
Tandem duplication event3	MsLAC28	MsLAC29	MsLAC30			chr3.2:69496048-69501745	chr3.2:69510241-69515994	chr3.2:69520133-69524342
Tandem duplication event4	MsLAC38	MsLAC39	MsLAC40			chr3.3:66644312-66649994	chr3.3:66660416-66666200	chr3.3:66670329-66675629
Tandem duplication event5	MsLAC41	MsLAC42				chr3.3:70107623-70109272	chr3.3:70110458-70102110
Tandem duplication event6	MsLAC43	MsLAC44				chr3.3:84163619-84166838	chr3.3:84171057-84175452
Tandem duplication event7	MsLAC49	MsLAC50				chr3.4:75255880-75261576	chr3.4:75272169-75283113
Tandem duplication event8	MsLAC51	MsLAC52				chr3.4:78464611-78466260	chr3.4:78467446-78469098
Tandem duplication event9	MsLAC53	MsLAC54				chr3.4:89477158-89480464	chr3.4:89496743-89501132
Tandem duplication event10	MsLAC56	MsLAC57	MsLAC58			chr4.1:24437317-24438945	chr4.1:24457575-24459203	chr4.1:24466312-24468274
Tandem duplication event11	MsLAC66	MsLAC67				chr4.2:26301977-26303605	chr4.2:26309852-26311814
Tandem duplication event12	MsLAC79	MsLAC80				chr4.4:29883729-29885357	chr4.4:29897280-29899246
Tandem duplication event13	MsLAC112	MsLAC113				chr7.1:36497723-36500911	chr7.1:36510212-36513814
Tandem duplication event14	MsLAC123	MsLAC124				chr7.2:43219990-43223547	chr7.2:43247826-43250922
Tandem duplication event15	MsLAC131	MsLAC132				chr7.3:46005454-46007707	chr7.3:52732467-52737296
Tandem duplication event16	MsLAC134	MsLAC135				chr7.3:66802315-66813008	chr7.3:66820475-66825190
Tandem duplication event17	MsLAC136	MsLAC137				chr7.4:38968813-38971889	chr7.4:38981564-38985269
Tandem duplication event18	MsLAC140	MsLAC141				chr7.4:44679278-44681531	chr7.4:44689643-44692183
Tandem duplication event19	MsLAC147	MsLAC148				chr8.2:26570699-26574167	chr8.2:26582795-26585761
Tandem duplication event20	MsLAC151	MsLAC152				chr8.3:25041320-25044724	chr8.3:25052571-25055525
Tandem duplication event21	MsLAC154	MsLAC155				chr8.4:27571857-27575256	chr8.4:27586553-27589497
